# Supplementary material
Source: HighWire-hosted journal article supplement (https://erj.ersjournals.com/content/59/2/2002964)
Supplement: inline-supplementary-material-1 [file inline-supplementary-material-1.pdf]

## **Supplementary material**

### **Supplementary methods**

**Supplementary Table S1.** Risk of bias assessment using QUIPS tool for the 428 eligible articles that participated in the meta-analyses.

**Supplementary Table S2.** Results of the 263 meta-analyses for predictors of clinical outcomes in patients with COVID-19.

**Supplementary Table S3.** Results of the sensitivity analysis excluding the studies that reported hazard ratios.

**Supplementary Table S4.** Results of the sensitivity analysis excluding the studies with less than 100 COVID-19 participants.

**Supplementary Table S5.** Results of the sensitivity analysis excluding the studies including only COVID-19 patients with a specific comorbid disorder.

### **Supplementary references**

## **Supplementary methods**

### *Eligibility criteria*

We excluded studies that examined the diagnostic factors distinguishing COVID-19 pneumonia and community-acquired pneumonia; the prognostic factors for infections by other coronaviruses; and the predictors of a positive result in testing for SARS-COV-2 in patients suspected for COVID-19. Moreover, we excluded studies that performed propensity score matching, because this approach is appropriate for causal inference rather than prediction. We excluded case-series including less than 20 COVID-19 patients, and studies published in languages other than English.

### *Data extraction*

If the handling of a prognostic factor (i.e., dichotomous, categorical, or continuous) was not reported, we did not extract this association. For dichotomized continuous prognostic factors, we extracted the cut-off value. Also, when a measure of association was not reported, for binary factors, we extracted the number of individuals with the factor present in both patients with and without the outcome. For studies conducted in the same geographic region, we compared hospitals and recruitment periods to ensure that fully independent populations will be included in each meta-analysis. When multiple studies with potentially overlapping samples examined the same association, we kept the study that had the largest sample size for the corresponding meta-analysis.

### *Risk of bias assessment*

We also assessed whether the eligible studies applied a multivariable analysis in which they adjusted the associations of specific prognostic factors for other prognostic factors. For studies examining multiple prognostic factors and/or outcomes, we assessed the pertinent question with the highest risk of bias grade for the ascertainment

of the prognostic factor and outcome. The eligible studies were assessed on the basis of the prognostic factors and the outcomes that participated in a meta-analysis.

**Supplementary Table S1.** Risk of bias assessment using QUIPS tool for the 428 eligible articles that participated in the meta-analyses.

| First Author, Year                   | Country            | Study participation | Study attrition | Prognostic factor measurement | Outcome measurement | Adjustment for other prognostic factors | Statistical analysis and reporting |
|--------------------------------------|--------------------|---------------------|-----------------|-------------------------------|---------------------|-----------------------------------------|------------------------------------|
| Abrishami et al, 2020 <sup>1</sup>   | Iran               | High risk           | Low risk        | Moderate risk                 | Low risk            | High risk                               | High risk                          |
| Abrishami et al, 2020 <sup>2</sup>   | Iran               | High risk           | Low risk        | High risk                     | Low risk            | High risk                               | High risk                          |
| Adegunsoye et al, 2020 <sup>3</sup>  | USA                | Moderate risk       | Low risk        | Low risk                      | Low risk            | Moderate risk                           | High risk                          |
| Aggarwal et al, 2020 <sup>4</sup>    | India              | High risk           | Low risk        | High risk                     | Low risk            | High risk                               | High risk                          |
| Alberici et al, 2020 <sup>5</sup>    | Italy              | Moderate risk       | Low risk        | High risk                     | Low risk            | High risk                               | High risk                          |
| Alkundi et al, 2020 <sup>6</sup>     | UK                 | High risk           | Low risk        | Moderate risk                 | Low risk            | High risk                               | High risk                          |
| Allocca et al, 2020 <sup>7</sup>     | Italy              | High risk           | Low risk        | High risk                     | High risk           | High risk                               | High risk                          |
| Aloisio et al, 2020 <sup>8</sup>     | Italy              | High risk           | Low risk        | High risk                     | Low risk            | High risk                               | High risk                          |
| Aloisio et al, 2020 <sup>9</sup>     | Italy              | High risk           | Low risk        | Low risk                      | Low risk            | High risk                               | High risk                          |
| Al-Salameh et al, 2020 <sup>10</sup> | France             | Low risk            | Low risk        | Moderate risk                 | Low risk            | High risk                               | High risk                          |
| Al-Samkari et al, 2020 <sup>11</sup> | USA                | High risk           | Low risk        | High risk                     | Low risk            | High risk                               | High risk                          |
| Amit et al, 2020 <sup>12</sup>       | Israel             | High risk           | Low risk        | High risk                     | Low risk            | High risk                               | High risk                          |
| Antinori et al, 2020 <sup>13</sup>   | Italy              | High risk           | Low risk        | High risk                     | Low risk            | High risk                               | High risk                          |
| Antony et al, 2020 <sup>14</sup>     | USA                | High risk           | Low risk        | High risk                     | Low risk            | High risk                               | High risk                          |
| Arapovic et al, 2020 <sup>15</sup>   | Bosnia-Herzegovina | High risk           | Low risk        | Low risk                      | Low risk            | High risk                               | High risk                          |
| Argenziano et al, 2020 <sup>16</sup> | USA                | Moderate risk       | Low risk        | High risk                     | Low risk            | High risk                               | High risk                          |
| Arlet et al, 2020 <sup>17</sup>      | France             | High risk           | Low risk        | Low risk                      | Low risk            | High risk                               | High risk                          |
| Artifoni et al, 2020 <sup>18</sup>   | France             | High risk           | Low risk        | High risk                     | Low risk            | High risk                               | High risk                          |
| Assaad et al, 2020 <sup>19</sup>     | France             | Moderate risk       | Low risk        | Low risk                      | Low risk            | High risk                               | Moderate risk                      |
| Auld et al, 2020 <sup>20</sup>       | USA                | High risk           | Low risk        | Moderate risk                 | Low risk            | High risk                               | High risk                          |
| Ayanian et al, 2020 <sup>21</sup>    | USA                | High risk           | Low risk        | High risk                     | Low risk            | High risk                               | High risk                          |
| Ayerbe et al, 2020 <sup>22</sup>     | Spain              | High risk           | Low risk        | Moderate risk                 | Low risk            | High risk                               | High risk                          |
| Azar et al, 2020 <sup>23</sup>       | USA                | Low risk            | Low risk        | High risk                     | Low risk            | High risk                               | High risk                          |
| Baqui et al, 2020 <sup>24</sup>      | Brazil             | High risk           | Low risk        | High risk                     | Low risk            | High risk                               | High risk                          |
| Barbero et al, 2020 <sup>25</sup>    | Spain              | Moderate risk       | Low risk        | High risk                     | Low risk            | High risk                               | High risk                          |
| Barman et al, 2020 <sup>26</sup>     | Turkey             | High risk           | Low risk        | Low risk                      | Low risk            | High risk                               | Moderate risk                      |
| Barrasa et al, 2020 <sup>27</sup>    | Spain              | Low risk            | Low risk        | Low risk                      | Low risk            | High risk                               | High risk                          |
| Bavaro et al, 2020 <sup>28</sup>     | Italy              | High risk           | Low risk        | Moderate risk                 | Low risk            | High risk                               | High risk                          |
| Bazzan et al, 2020 <sup>29</sup>     | Italy              | High risk           | Low risk        | Low risk                      | Low risk            | High risk                               | High risk                          |
| Bean et al, 2020 <sup>30</sup>       | UK                 | Low risk            | Low risk        | Low risk                      | Low risk            | Moderate risk                           | High risk                          |
| Bellelli et al, 2020 <sup>31</sup>   | Italy              | High risk           | Low risk        | Moderate risk                 | Low risk            | High risk                               | High risk                          |
| Benoy et al, 2020 <sup>32</sup>      | Netherlands        | High risk           | Low risk        | High risk                     | Low risk            | High risk                               | High risk                          |
| Benussi et al, 2020 <sup>33</sup>    | Italy              | High risk           | Low risk        | Low risk                      | Low risk            | High risk                               | High risk                          |
| Bhargava et al, 2020 <sup>34</sup>   | USA                | High risk           | Low risk        | High risk                     | Low risk            | High risk                               | High risk                          |

| First Author, Year                        | Country     | Study participation | Study attrition | Prognostic factor measurement | Outcome measurement | Adjustment for other prognostic factors | Statistical analysis and reporting |
|-------------------------------------------|-------------|---------------------|-----------------|-------------------------------|---------------------|-----------------------------------------|------------------------------------|
| Bhatla et al, 2020 <sup>35</sup>          | USA         | Low risk            | Low risk        | High risk                     | Low risk            | High risk                               | High risk                          |
| Biagi et al, 2020 <sup>36</sup>           | Italy       | Low risk            | Low risk        | Low risk                      | Low risk            | High risk                               | High risk                          |
| Bianchetti et al, 2020 <sup>37</sup>      | Italy       | Moderate risk       | Low risk        | Moderate risk                 | Low risk            | Moderate risk                           | High risk                          |
| Bolondi et al, 2020 <sup>38</sup>         | Italy       | High risk           | Low risk        | Low risk                      | Low risk            | High risk                               | High risk                          |
| Bonetti et al, 2020 <sup>39</sup>         | Italy       | High risk           | Low risk        | Moderate risk                 | Low risk            | High risk                               | High risk                          |
| Borghesi et al, 2020 <sup>40</sup>        | Italy       | High risk           | Low risk        | High risk                     | Low risk            | High risk                               | High risk                          |
| Borobia et al, 2020 <sup>41</sup>         | Spain       | High risk           | Low risk        | High risk                     | Low risk            | High risk                               | High risk                          |
| Boscolo et al, 2020 <sup>42</sup>         | Italy       | High risk           | Low risk        | High risk                     | Low risk            | High risk                               | High risk                          |
| Bossini et al, 2020 <sup>43</sup>         | Italy       | Moderate risk       | Low risk        | High risk                     | Low risk            | High risk                               | High risk                          |
| Bravi et al, 2020 <sup>44</sup>           | Italy       | Low risk            | Low risk        | Moderate risk                 | Low risk            | High risk                               | High risk                          |
| Brill et al, 2020 <sup>45</sup>           | UK          | High risk           | Low risk        | High risk                     | Low risk            | High risk                               | High risk                          |
| Brouns et al, 2020 <sup>46</sup>          | Netherlands | High risk           | Low risk        | Moderate risk                 | Low risk            | High risk                               | High risk                          |
| Bruno et al, 2020 <sup>47</sup>           | Italy       | Low risk            | Low risk        | Low risk                      | Low risk            | High risk                               | High risk                          |
| Buckner et al, 2020 <sup>48</sup>         | USA         | Low risk            | Low risk        | High risk                     | Low risk            | High risk                               | High risk                          |
| Buscarini et al, 2020 <sup>49</sup>       | Italy       | Moderate risk       | Low risk        | High risk                     | Low risk            | High risk                               | High risk                          |
| Busetto et al, 2020 <sup>50</sup>         | Italy       | Low risk            | Low risk        | High risk                     | Low risk            | Moderate risk                           | High risk                          |
| Cabezudo-García et al, 2020 <sup>51</sup> | Spain       | High risk           | Low risk        | Moderate risk                 | Low risk            | High risk                               | High risk                          |
| Cai et al, 2020 <sup>52</sup>             | China       | High risk           | Low risk        | High risk                     | Low risk            | High risk                               | High risk                          |
| Cao et al, 2020 <sup>53</sup>             | China       | Low risk            | Low risk        | Low risk                      | Low risk            | High risk                               | High risk                          |
| Cariou et al, 2020 <sup>54</sup>          | France      | High risk           | Low risk        | High risk                     | Low risk            | High risk                               | High risk                          |
| Carlino et al, 2020 <sup>55</sup>         | Italy       | High risk           | Low risk        | High risk                     | Low risk            | High risk                               | High risk                          |
| Carrasco et al, 2020 <sup>56</sup>        | Spain       | High risk           | Low risk        | Moderate risk                 | Low risk            | High risk                               | High risk                          |
| Caussy et al, 2020 <sup>57</sup>          | France      | High risk           | Low risk        | High risk                     | Low risk            | High risk                               | High risk                          |
| Ceano-Vivas et al, 2020 <sup>58</sup>     | Spain       | Moderate risk       | Low risk        | High risk                     | Low risk            | High risk                               | High risk                          |
| Cecconi et al, 2020 <sup>59</sup>         | Italy       | Low risk            | Low risk        | High risk                     | Low risk            | High risk                               | Moderate risk                      |
| Cen et al, 2020 <sup>60</sup>             | China       | High risk           | Low risk        | High risk                     | Low risk            | High risk                               | High risk                          |
| Chamorro-Pareja et al, 2020 <sup>61</sup> | USA         | High risk           | Low risk        | Low risk                      | Low risk            | High risk                               | High risk                          |
| Chan et al, 2020 <sup>62</sup>            | Singapore   | High risk           | Low risk        | Low risk                      | Low risk            | High risk                               | High risk                          |
| Chao et al, 2020 <sup>63</sup>            | USA         | High risk           | Low risk        | High risk                     | Low risk            | High risk                               | High risk                          |
| Chaudhry et al, 2020 <sup>64</sup>        | USA         | High risk           | Low risk        | High risk                     | Low risk            | High risk                               | High risk                          |
| Chen et al, 2020 <sup>65</sup>            | China       | High risk           | Low risk        | High risk                     | Low risk            | High risk                               | High risk                          |
| Chen et al, 2020 <sup>66</sup>            | China       | High risk           | Low risk        | High risk                     | Low risk            | High risk                               | High risk                          |
| Chen et al, 2020 <sup>67</sup>            | China       | High risk           | Low risk        | High risk                     | Low risk            | High risk                               | High risk                          |
| Chen et al, 2020 <sup>68</sup>            | China       | High risk           | Low risk        | High risk                     | Low risk            | High risk                               | High risk                          |
| Chen et al, 2020 <sup>69</sup>            | China       | High risk           | Low risk        | High risk                     | Low risk            | High risk                               | High risk                          |
| Chen et al, 2020 <sup>70</sup>            | China       | High risk           | Low risk        | High risk                     | Low risk            | High risk                               | Moderate risk                      |
| Chen et al, 2021 <sup>71</sup>            | China       | High risk           | Low risk        | Moderate risk                 | Moderate risk       | High risk                               | High risk                          |

| First Author, Year                           | Country | Study participation | Study attrition | Prognostic factor measurement | Outcome measurement | Adjustment for other prognostic factors | Statistical analysis and reporting |
|----------------------------------------------|---------|---------------------|-----------------|-------------------------------|---------------------|-----------------------------------------|------------------------------------|
| Chen et al, 2020 <sup>72</sup>               | China   | High risk           | Low risk        | Moderate risk                 | Low risk            | High risk                               | High risk                          |
| Chen et al, 2020 <sup>73</sup>               | China   | High risk           | Low risk        | Moderate risk                 | Low risk            | Moderate risk                           | High risk                          |
| Cheng et al, 2020 <sup>74</sup>              | China   | Low risk            | Low risk        | Low risk                      | Low risk            | High risk                               | Moderate risk                      |
| Chhibra et al, 2020 <sup>75</sup>            | USA     | Low risk            | Low risk        | Moderate risk                 | Low risk            | Moderate risk                           | Moderate risk                      |
| Cholankeril et al, 2020 <sup>76</sup>        | USA     | High risk           | Low risk        | High risk                     | Low risk            | High risk                               | High risk                          |
| Chougar et al, 2020 <sup>77</sup>            | France  | High risk           | Low risk        | High risk                     | Low risk            | High risk                               | High risk                          |
| Chung et al, 2020 <sup>78</sup>              | Korea   | High risk           | Low risk        | Moderate risk                 | High risk           | High risk                               | High risk                          |
| Ciceri et al, 2020 <sup>79</sup>             | Italy   | High risk           | Low risk        | High risk                     | Low risk            | High risk                               | High risk                          |
| Colombi et al, 2020 <sup>80</sup>            | Italy   | High risk           | Low risk        | High risk                     | Low risk            | High risk                               | High risk                          |
| Conversano et al, 2020 <sup>81</sup>         | Italy   | Low risk            | Moderate risk   | Low risk                      | Low risk            | High risk                               | High risk                          |
| Covino et al, 2020 <sup>82</sup>             | Italy   | Moderate risk       | Low risk        | High risk                     | Low risk            | High risk                               | High risk                          |
| Criel et al, 2020 <sup>83</sup>              | Belgium | High risk           | Low risk        | Moderate risk                 | Low risk            | High risk                               | High risk                          |
| d'Alessandro et al, 2020 <sup>84</sup>       | Italy   | High risk           | Low risk        | Low risk                      | Low risk            | High risk                               | High risk                          |
| Davies et al, 2020 <sup>85</sup>             | UK      | High risk           | Low risk        | Low risk                      | Low risk            | High risk                               | High risk                          |
| De Smet et al, 2020 <sup>86</sup>            | Belgium | High risk           | Low risk        | Moderate risk                 | Low risk            | High risk                               | High risk                          |
| Deiana et al, 2020 <sup>87</sup>             | Italy   | High risk           | Low risk        | Low risk                      | Low risk            | High risk                               | High risk                          |
| Del Amo et al, 2020 <sup>88</sup>            | Spain   | Low risk            | Low risk        | Low risk                      | Low risk            | High risk                               | High risk                          |
| Della-Torre et al, 2020 <sup>89</sup>        | Italy   | High risk           | Low risk        | High risk                     | Low risk            | High risk                               | High risk                          |
| Demelo-Rodríguez et al, 2020 <sup>90</sup>   | Spain   | High risk           | Low risk        | Moderate risk                 | Low risk            | High risk                               | High risk                          |
| Deng et al, 2020 <sup>91</sup>               | China   | High risk           | Low risk        | Moderate risk                 | Low risk            | High risk                               | High risk                          |
| Deng et al, 2020 <sup>92</sup>               | China   | High risk           | Low risk        | Moderate risk                 | Low risk            | High risk                               | High risk                          |
| Deng et al, 2020 <sup>93</sup>               | China   | High risk           | Low risk        | High risk                     | Low risk            | High risk                               | High risk                          |
| Denova-Gutiérrez et al, 2020 <sup>94</sup>   | Mexico  | Moderate risk       | Low risk        | High risk                     | Low risk            | High risk                               | High risk                          |
| Desborough et al, 2020 <sup>95</sup>         | UK      | High risk           | Low risk        | Moderate risk                 | High risk           | High risk                               | High risk                          |
| Di Bella et al, 2020 <sup>96</sup>           | Italy   | High risk           | Low risk        | High risk                     | Low risk            | High risk                               | High risk                          |
| Ding et al, 2020 <sup>97</sup>               | China   | High risk           | Low risk        | High risk                     | Low risk            | High risk                               | High risk                          |
| Docherty et al, 2020 <sup>98</sup>           | UK      | Low risk            | Low risk        | High risk                     | Low risk            | High risk                               | Moderate risk                      |
| Dreher et al, 2020 <sup>99</sup>             | Germany | High risk           | Low risk        | High risk                     | Low risk            | High risk                               | High risk                          |
| D'Silva et al, 2020 <sup>100</sup>           | USA     | High risk           | Low risk        | High risk                     | Low risk            | High risk                               | High risk                          |
| Du et al, 2020 <sup>101</sup>                | China   | High risk           | Low risk        | High risk                     | Low risk            | High risk                               | High risk                          |
| Du et al, 2020 <sup>102</sup>                | China   | Moderate risk       | Low risk        | High risk                     | Low risk            | High risk                               | High risk                          |
| Duanmu et al, 2020 <sup>103</sup>            | USA     | High risk           | Low risk        | High risk                     | Low risk            | High risk                               | High risk                          |
| Dudoignon et al, 2020 <sup>104</sup>         | France  | High risk           | Low risk        | Moderate risk                 | Low risk            | High risk                               | High risk                          |
| Dufour et al, 2020 <sup>105</sup>            | Belgium | High risk           | Low risk        | High risk                     | Low risk            | High risk                               | High risk                          |
| Ebinger et al, 2020 <sup>106</sup>           | USA     | Low risk            | Low risk        | High risk                     | Low risk            | High risk                               | High risk                          |
| Escalera-Antezana et al, 2020 <sup>107</sup> | Bolivia | Low risk            | Low risk        | Moderate risk                 | Low risk            | High risk                               | High risk                          |
| Fang et al, 2020 <sup>108</sup>              | UK      | High risk           | Low risk        | Moderate risk                 | Low risk            | High risk                               | High risk                          |

| First Author, Year                        | Country     | Study participation | Study attrition | Prognostic factor measurement | Outcome measurement | Adjustment for other prognostic factors | Statistical analysis and reporting |
|-------------------------------------------|-------------|---------------------|-----------------|-------------------------------|---------------------|-----------------------------------------|------------------------------------|
| Fauvel et al, 2020 <sup>109</sup>         | France      | High risk           | Low risk        | High risk                     | High risk           | High risk                               | High risk                          |
| Felice et al, 2020 <sup>110</sup>         | Italy       | Moderate risk       | Low risk        | Low risk                      | High risk           | High risk                               | High risk                          |
| Feng et al, 2020 <sup>111</sup>           | China       | High risk           | Low risk        | Low risk                      | Low risk            | High risk                               | High risk                          |
| Ferguson et al, 2020 <sup>112</sup>       | USA         | Low risk            | Low risk        | Moderate risk                 | Low risk            | High risk                               | High risk                          |
| Ferm et al, 2020 <sup>113</sup>           | USA         | High risk           | Low risk        | High risk                     | Low risk            | High risk                               | High risk                          |
| Fernández-Cruz et al, 2020 <sup>114</sup> | Spain       | High risk           | Low risk        | High risk                     | Low risk            | High risk                               | High risk                          |
| Ferrante et al, 2020 <sup>115</sup>       | Italy       | High risk           | Low risk        | High risk                     | Low risk            | High risk                               | Moderate risk                      |
| Fisher et al, 2020 <sup>116</sup>         | USA         | High risk           | Low risk        | Moderate risk                 | Low risk            | High risk                               | High risk                          |
| Fogarty et al, 2020 <sup>117</sup>        | Ireland     | Low risk            | Low risk        | Moderate risk                 | Low risk            | High risk                               | High risk                          |
| Fominskiy et al, 2021 <sup>118</sup>      | Italy       | Low risk            | Low risk        | Moderate risk                 | Low risk            | High risk                               | High risk                          |
| Fosbøl et al, 2020 <sup>119</sup>         | Denmark     | Low risk            | Low risk        | Low risk                      | Low risk            | Low risk                                | Moderate risk                      |
| Foster et al, 2020 <sup>120</sup>         | USA         | Moderate risk       | Low risk        | High risk                     | Low risk            | High risk                               | High risk                          |
| Fox et al, 2020 <sup>121</sup>            | UK          | High risk           | Low risk        | High risk                     | Low risk            | High risk                               | High risk                          |
| Francone et al, 2020 <sup>122</sup>       | Italy       | High risk           | Low risk        | Moderate risk                 | Low risk            | High risk                               | High risk                          |
| Göttinger et al, 2020 <sup>123</sup>      | Europe      | High risk           | Low risk        | High risk                     | Low risk            | High risk                               | High risk                          |
| Gallo et al, 2020 <sup>124</sup>          | Italy       | Moderate risk       | Low risk        | High risk                     | Low risk            | High risk                               | High risk                          |
| Gao et al, 2020 <sup>125</sup>            | China       | High risk           | Low risk        | Moderate risk                 | Low risk            | High risk                               | Moderate risk                      |
| Gao et al, 2020 <sup>126</sup>            | China       | Low risk            | Low risk        | High risk                     | Low risk            | High risk                               | High risk                          |
| Gao et al, 2020 <sup>127</sup>            | China       | High risk           | Low risk        | High risk                     | Low risk            | High risk                               | High risk                          |
| Garcia-Pachon et al, 2020 <sup>128</sup>  | Spain       | Low risk            | Low risk        | Moderate risk                 | Low risk            | High risk                               | High risk                          |
| Gavin et al, 2020 <sup>129</sup>          | USA         | Low risk            | Low risk        | High risk                     | Low risk            | High risk                               | High risk                          |
| Gayam et al, 2021 <sup>130</sup>          | USA         | High risk           | Low risk        | High risk                     | Low risk            | High risk                               | High risk                          |
| Gazzaruso et al, 2020 <sup>131</sup>      | Italy       | High risk           | Low risk        | Low risk                      | Low risk            | High risk                               | High risk                          |
| Gervaise et al, 2020 <sup>132</sup>       | France      | High risk           | Low risk        | Low risk                      | Low risk            | High risk                               | High risk                          |
| Gervasoni et al, 2020 <sup>133</sup>      | Italy       | Moderate risk       | Low risk        | Low risk                      | High risk           | High risk                               | High risk                          |
| Giacomelli et al, 2020 <sup>134</sup>     | Italy       | Low risk            | Low risk        | High risk                     | Low risk            | High risk                               | High risk                          |
| Gidari et al, 2020 <sup>135</sup>         | Italy       | Moderate risk       | Low risk        | Moderate risk                 | Low risk            | High risk                               | High risk                          |
| Giusti et al, 2020 <sup>136</sup>         | Italy       | High risk           | Low risk        | Low risk                      | Low risk            | High risk                               | High risk                          |
| Goicoechea et al, 2020 <sup>137</sup>     | Spain       | Moderate risk       | Low risk        | High risk                     | Low risk            | High risk                               | High risk                          |
| Gold et al, 2020 <sup>138</sup>           | USA         | High risk           | Low risk        | Low risk                      | Low risk            | High risk                               | High risk                          |
| Golpe et al, 2020 <sup>139</sup>          | Spain       | High risk           | Low risk        | High risk                     | Low risk            | Moderate risk                           | Moderate risk                      |
| Golpe et al, 2020 <sup>140</sup>          | Spain       | Moderate risk       | Low risk        | Moderate risk                 | Low risk            | Moderate risk                           | Moderate risk                      |
| Goshua et al, 2020 <sup>141</sup>         | USA         | High risk           | Low risk        | High risk                     | Low risk            | High risk                               | High risk                          |
| Goyal et al, 2020 <sup>142</sup>          | USA         | Low risk            | Low risk        | High risk                     | Low risk            | High risk                               | High risk                          |
| Goyal et al, 2020 <sup>143</sup>          | USA         | High risk           | Low risk        | High risk                     | Low risk            | Moderate risk                           | Moderate risk                      |
| Grandmaison et al, 2020 <sup>144</sup>    | Switzerland | High risk           | Low risk        | Moderate risk                 | Moderate risk       | High risk                               | High risk                          |
| Grasseli et al, 2020 <sup>145</sup>       | Italy       | High risk           | Low risk        | High risk                     | Low risk            | High risk                               | High risk                          |
| Gregoriano et al, 2020 <sup>146</sup>     | Switzerland | Low risk            | Low risk        | High risk                     | Low risk            | High risk                               | Moderate risk                      |

| First Author, Year                             | Country     | Study participation | Study attrition | Prognostic factor measurement | Outcome measurement | Adjustment for other prognostic factors | Statistical analysis and reporting |
|------------------------------------------------|-------------|---------------------|-----------------|-------------------------------|---------------------|-----------------------------------------|------------------------------------|
| Guan et al, 2020 <sup>147</sup>                | China       | High risk           | Low risk        | Low risk                      | Low risk            | High risk                               | High risk                          |
| Gupta et al, 2020 <sup>148</sup>               | USA         | Low risk            | Low risk        | High risk                     | Low risk            | Moderate risk                           | Moderate risk                      |
| Hajifathalian et al, 2020 <sup>149</sup>       | USA         | Low risk            | Low risk        | High risk                     | Low risk            | High risk                               | High risk                          |
| Hajifathalian et al, 2020 <sup>150</sup>       | USA         | High risk           | Low risk        | High risk                     | Low risk            | High risk                               | Moderate risk                      |
| Halasz et al, 2020 <sup>151</sup>              | Italy       | Moderate risk       | Low risk        | High risk                     | Low risk            | High risk                               | High risk                          |
| Halvatsiotis et al, 2020 <sup>152</sup>        | Greece      | High risk           | Low risk        | High risk                     | Low risk            | High risk                               | High risk                          |
| Harmouch et al, 2020 <sup>153</sup>            | USA         | High risk           | Low risk        | High risk                     | Low risk            | High risk                               | High risk                          |
| Hattori et al, 2021 <sup>154</sup>             | Japan       | High risk           | Low risk        | Low risk                      | High risk           | High risk                               | High risk                          |
| Hengeveld et al, 2020 <sup>155</sup>           | Netherlands | Moderate risk       | Low risk        | High risk                     | Low risk            | High risk                               | High risk                          |
| Herold et al, 2020 <sup>156</sup>              | Germany     | High risk           | Low risk        | High risk                     | Low risk            | High risk                               | High risk                          |
| Hewitt et al, 2020 <sup>157</sup>              | UK, Italy   | High risk           | Low risk        | High risk                     | Low risk            | Moderate risk                           | Moderate risk                      |
| Hippensteel et al, 2020 <sup>158</sup>         | USA         | High risk           | Low risk        | High risk                     | High risk           | High risk                               | High risk                          |
| Hirsch et al, 2020 <sup>159</sup>              | USA         | High risk           | Low risk        | Moderate risk                 | Low risk            | Moderate risk                           | High risk                          |
| Holt et al, 2020 <sup>160</sup>                | Denmark     | Low risk            | Low risk        | Low risk                      | Low risk            | High risk                               | High risk                          |
| Hong et al, 2020 <sup>161</sup>                | Korea       | Moderate risk       | Low risk        | High risk                     | Low risk            | High risk                               | High risk                          |
| Horby et al, 2020 <sup>162</sup>               | UK          | Moderate risk       | Low risk        | High risk                     | Low risk            | High risk                               | High risk                          |
| Hottz et al, 2020 <sup>163</sup>               | Brazil      | High risk           | Low risk        | High risk                     | Low risk            | High risk                               | High risk                          |
| Hsu et al, 2020 <sup>164</sup>                 | USA         | Moderate risk       | Low risk        | High risk                     | Low risk            | High risk                               | High risk                          |
| Hu et al, 2020 <sup>165</sup>                  | China       | High risk           | Low risk        | Moderate risk                 | Low risk            | High risk                               | High risk                          |
| Huang et al, 2020 <sup>166</sup>               | China       | Low risk            | Low risk        | High risk                     | Low risk            | High risk                               | High risk                          |
| Huang et al, 2020 <sup>167</sup>               | China       | High risk           | Low risk        | High risk                     | Low risk            | High risk                               | High risk                          |
| Huang et al, 2020 <sup>168</sup>               | China       | High risk           | Low risk        | High risk                     | Low risk            | High risk                               | High risk                          |
| Huang et al, 2020 <sup>169</sup>               | China       | High risk           | Low risk        | High risk                     | Low risk            | High risk                               | High risk                          |
| Hur et al, 2020 <sup>170</sup>                 | USA         | High risk           | Low risk        | High risk                     | Low risk            | High risk                               | High risk                          |
| Husain-Syed et al, 2020 <sup>171</sup>         | Germany     | High risk           | Low risk        | Moderate risk                 | Low risk            | High risk                               | High risk                          |
| Hwang et al, 2020 <sup>172</sup>               | Korea       | High risk           | Low risk        | Moderate risk                 | Low risk            | High risk                               | High risk                          |
| Iaccarino et al, 2020 <sup>173</sup>           | Italy       | High risk           | Low risk        | High risk                     | Low risk            | High risk                               | High risk                          |
| Imam et al, 2020 <sup>174</sup>                | USA         | High risk           | Low risk        | High risk                     | High risk           | High risk                               | High risk                          |
| Imam et al, 2020 <sup>175</sup>                | USA         | High risk           | Low risk        | High risk                     | Low risk            | High risk                               | High risk                          |
| Inciardi et al, 2020 <sup>176</sup>            | Italy       | High risk           | Low risk        | High risk                     | Low risk            | High risk                               | High risk                          |
| Israelsen et al, 2020 <sup>177</sup>           | Denmark     | Low risk            | Low risk        | High risk                     | Low risk            | High risk                               | High risk                          |
| Izquierdo-Domínguez et al, 2020 <sup>178</sup> | Spain       | High risk           | Low risk        | High risk                     | Low risk            | High risk                               | High risk                          |
| Jalili et al, 2021 <sup>179</sup>              | Iran        | Low risk            | Low risk        | High risk                     | Low risk            | High risk                               | High risk                          |
| Jang et al, 2020 <sup>180</sup>                | Korea       | High risk           | Low risk        | High risk                     | Low risk            | High risk                               | High risk                          |
| Javanian et al, 2020 <sup>181</sup>            | Iran        | High risk           | Low risk        | High risk                     | Low risk            | High risk                               | High risk                          |
| Jiang et al, 2020 <sup>182</sup>               | China       | High risk           | Low risk        | High risk                     | Low risk            | High risk                               | High risk                          |
| Jordan et al, 2020 <sup>183</sup>              | USA         | High risk           | Low risk        | Moderate risk                 | Low risk            | High risk                               | High risk                          |
| Jung et al, 2020 <sup>184</sup>                | Korea       | Low risk            | Low risk        | Low risk                      | Low risk            | Moderate risk                           | High risk                          |

| First Author, Year                      | Country     | Study participation | Study attrition | Prognostic factor measurement | Outcome measurement | Adjustment for other prognostic factors | Statistical analysis and reporting |
|-----------------------------------------|-------------|---------------------|-----------------|-------------------------------|---------------------|-----------------------------------------|------------------------------------|
| Kalan et al, 2020 <sup>185</sup>        | Iran        | High risk           | Low risk        | High risk                     | Low risk            | High risk                               | High risk                          |
| Kalligeros et al, 2020 <sup>186</sup>   | USA         | Low risk            | Low risk        | High risk                     | Low risk            | High risk                               | High risk                          |
| Karmen-Tuohy et al, 2020 <sup>187</sup> | USA         | High risk           | Low risk        | Moderate risk                 | Low risk            | High risk                               | High risk                          |
| Kayem et al, 2020 <sup>188</sup>        | France      | High risk           | Low risk        | High risk                     | High risk           | High risk                               | High risk                          |
| Kebisek et al, 2020 <sup>189</sup>      | USA         | Low risk            | Low risk        | High risk                     | Low risk            | High risk                               | High risk                          |
| Khalil et al, 2020 <sup>190</sup>       | UK          | High risk           | Low risk        | High risk                     | Low risk            | High risk                               | High risk                          |
| Khamis et al, 2020 <sup>191</sup>       | Oman        | Moderate risk       | Low risk        | High risk                     | Low risk            | High risk                               | High risk                          |
| Khamis et al, 2020 <sup>192</sup>       | Oman        | Low risk            | Low risk        | Low risk                      | Low risk            | High risk                               | High risk                          |
| Killerby et al, 2020 <sup>193</sup>     | USA         | High risk           | Low risk        | High risk                     | Low risk            | High risk                               | High risk                          |
| Kim et al, 2020 <sup>194</sup>          | Korea       | Low risk            | Low risk        | Moderate risk                 | Low risk            | Moderate risk                           | High risk                          |
| Kim et al, 2020 <sup>195</sup>          | USA         | High risk           | Low risk        | High risk                     | Low risk            | Low risk                                | Moderate risk                      |
| King et al, 2020 <sup>196</sup>         | USA         | High risk           | Low risk        | High risk                     | Low risk            | High risk                               | High risk                          |
| Klang et al, 2020 <sup>197</sup>        | USA         | High risk           | Low risk        | High risk                     | Low risk            | Moderate risk                           | High risk                          |
| Klok et al, 2020 <sup>198</sup>         | Netherlands | High risk           | Low risk        | Low risk                      | Low risk            | High risk                               | High risk                          |
| Knights et al, 2020 <sup>199</sup>      | UK          | High risk           | Low risk        | High risk                     | Low risk            | High risk                               | High risk                          |
| Knorr et al, 2020 <sup>200</sup>        | USA         | High risk           | Low risk        | Moderate risk                 | Low risk            | High risk                               | High risk                          |
| Koleilat et al, 2021 <sup>201</sup>     | USA         | High risk           | Low risk        | Moderate risk                 | High risk           | High risk                               | High risk                          |
| Korkmaz et al, 2020 <sup>202</sup>      | Turkey      | High risk           | Low risk        | High risk                     | Low risk            | High risk                               | High risk                          |
| Kormann et al, 2020 <sup>203</sup>      | France      | High risk           | Low risk        | High risk                     | Low risk            | High risk                               | High risk                          |
| Kragholm et al, 2020 <sup>204</sup>     | Denmark     | Low risk            | Low risk        | Low risk                      | Low risk            | Low risk                                | Low risk                           |
| Krishnan et al, 2020 <sup>205</sup>     | USA         | High risk           | Low risk        | Moderate risk                 | Low risk            | High risk                               | High risk                          |
| Kuno et al, 2020 <sup>206</sup>         | USA         | High risk           | Low risk        | Moderate risk                 | Low risk            | High risk                               | High risk                          |
| Lagadinou et al, 2020 <sup>207</sup>    | Greece      | High risk           | Low risk        | Moderate risk                 | Low risk            | High risk                               | High risk                          |
| Lagi et al, 2020 <sup>208</sup>         | Italy       | Moderate risk       | Low risk        | High risk                     | Low risk            | High risk                               | High risk                          |
| Larsen et al, 2020 <sup>209</sup>       | France      | High risk           | Low risk        | High risk                     | Low risk            | High risk                               | High risk                          |
| Larson et al, 2020 <sup>210</sup>       | USA         | Moderate risk       | Low risk        | High risk                     | Low risk            | High risk                               | High risk                          |
| Lee et al, 2020 <sup>211</sup>          | UK          | Moderate risk       | Low risk        | Moderate risk                 | Low risk            | High risk                               | High risk                          |
| Lee et al, 2020 <sup>212</sup>          | Korea       | Moderate risk       | Low risk        | High risk                     | Low risk            | High risk                               | High risk                          |
| Lee et al, 2020 <sup>213</sup>          | Korea       | High risk           | Low risk        | High risk                     | Low risk            | High risk                               | High risk                          |
| Lee et al, 2020 <sup>214</sup>          | USA         | High risk           | Low risk        | High risk                     | Low risk            | High risk                               | High risk                          |
| Li et al, 2020 <sup>215</sup>           | China       | High risk           | Low risk        | Moderate risk                 | Low risk            | High risk                               | High risk                          |
| Li et al, 2020 <sup>216</sup>           | China       | Low risk            | Low risk        | Moderate risk                 | Low risk            | High risk                               | Moderate risk                      |
| Li et al, 2020 <sup>217</sup>           | China       | High risk           | Low risk        | High risk                     | Low risk            | Moderate risk                           | High risk                          |
| Li et al, 2020 <sup>218</sup>           | China       | Low risk            | Low risk        | High risk                     | Low risk            | High risk                               | High risk                          |
| Li et al, 2020 <sup>219</sup>           | China       | High risk           | Low risk        | Low risk                      | Low risk            | High risk                               | High risk                          |
| Li et al, 2020 <sup>220</sup>           | China       | High risk           | Low risk        | High risk                     | Low risk            | High risk                               | High risk                          |
| Li et al, 2020 <sup>221</sup>           | China       | High risk           | Low risk        | Moderate risk                 | Low risk            | High risk                               | High risk                          |
| Liabeuf et al, 2020 <sup>222</sup>      | France      | High risk           | Low risk        | High risk                     | Low risk            | High risk                               | High risk                          |
| Lim et al, 2020 <sup>223</sup>          | Korea       | High risk           | Low risk        | Moderate risk                 | Low risk            | High risk                               | High risk                          |

| First Author, Year                           | Country     | Study participation | Study attrition | Prognostic factor measurement | Outcome measurement | Adjustment for other prognostic factors | Statistical analysis and reporting |
|----------------------------------------------|-------------|---------------------|-----------------|-------------------------------|---------------------|-----------------------------------------|------------------------------------|
| Lin et al, 2021 <sup>224</sup>               | China       | High risk           | Low risk        | High risk                     | Low risk            | High risk                               | Moderate risk                      |
| Liu et al, 2020 <sup>225</sup>               | China       | High risk           | Low risk        | High risk                     | Low risk            | High risk                               | High risk                          |
| Liu et al, 2020 <sup>226</sup>               | China       | High risk           | Low risk        | High risk                     | Low risk            | High risk                               | High risk                          |
| Liu et al, 2020 <sup>227</sup>               | China       | High risk           | Low risk        | Moderate risk                 | Low risk            | High risk                               | High risk                          |
| Liu et al, 2020 <sup>228</sup>               | China       | High risk           | Low risk        | High risk                     | Low risk            | High risk                               | High risk                          |
| Liu et al, 2020 <sup>229</sup>               | China       | High risk           | Low risk        | High risk                     | Low risk            | High risk                               | High risk                          |
| Liu et al, 2020 <sup>230</sup>               | Hong Kong   | High risk           | Low risk        | High risk                     | Low risk            | High risk                               | High risk                          |
| Liu et al, 2020 <sup>231</sup>               | China       | High risk           | Low risk        | Moderate risk                 | Low risk            | High risk                               | High risk                          |
| Liu et al, 2020 <sup>232</sup>               | China       | High risk           | Low risk        | High risk                     | Low risk            | High risk                               | High risk                          |
| Lodigiani et al, 2020 <sup>233</sup>         | Italy       | Moderate risk       | Low risk        | High risk                     | Low risk            | High risk                               | High risk                          |
| Loonstra et al, 2020 <sup>234</sup>          | Netherlands | High risk           | Low risk        | High risk                     | Low risk            | High risk                               | High risk                          |
| Lopez-Otero et al, 2021 <sup>235</sup>       | Spain       | Low risk            | Low risk        | Low risk                      | Low risk            | Moderate risk                           | High risk                          |
| Lorente-Ros et al, 2020 <sup>236</sup>       | Spain       | Moderate risk       | Low risk        | Moderate risk                 | Low risk            | High risk                               | Moderate risk                      |
| Louapre et al, 2020 <sup>237</sup>           | France      | High risk           | Low risk        | High risk                     | Low risk            | High risk                               | High risk                          |
| Luan et al, 2020 <sup>238</sup>              | China       | High risk           | Low risk        | High risk                     | Low risk            | High risk                               | High risk                          |
| Lubetzky et al, 2020 <sup>239</sup>          | USA         | High risk           | Low risk        | High risk                     | Low risk            | High risk                               | High risk                          |
| Lumbreras-Marquez et al, 2020 <sup>240</sup> | Mexico      | Low risk            | Low risk        | High risk                     | Low risk            | High risk                               | High risk                          |
| Luo et al, 2020 <sup>241</sup>               | China       | High risk           | Low risk        | High risk                     | Low risk            | High risk                               | High risk                          |
| Luo et al, 2020 <sup>242</sup>               | USA         | High risk           | Low risk        | Moderate risk                 | Low risk            | High risk                               | High risk                          |
| Luo et al, 2020 <sup>243</sup>               | China       | High risk           | Low risk        | High risk                     | Low risk            | High risk                               | High risk                          |
| Lynch et al, 2020 <sup>244</sup>             | USA         | High risk           | Low risk        | High risk                     | Low risk            | High risk                               | High risk                          |
| Ma et al, 2020 <sup>245</sup>                | China       | High risk           | Low risk        | High risk                     | Low risk            | High risk                               | High risk                          |
| Maatman et al, 2020 <sup>246</sup>           | USA         | High risk           | Low risk        | High risk                     | High risk           | High risk                               | High risk                          |
| Macara et al, 2020 <sup>247</sup>            | Italy       | High risk           | Low risk        | High risk                     | Low risk            | High risk                               | High risk                          |
| Mahdavinia et al, 2020 <sup>248</sup>        | USA         | High risk           | Low risk        | Moderate risk                 | Low risk            | High risk                               | High risk                          |
| Malberti et al, 2020 <sup>249</sup>          | Italy       | High risk           | Low risk        | Low risk                      | Low risk            | Moderate risk                           | High risk                          |
| Mani et al, 2020 <sup>250</sup>              | USA         | High risk           | Low risk        | High risk                     | Low risk            | High risk                               | High risk                          |
| Mannheim et al, 2020 <sup>251</sup>          | USA         | High risk           | Low risk        | High risk                     | Low risk            | High risk                               | High risk                          |
| Maquet et al, 2020 <sup>252</sup>            | France      | Low risk            | Low risk        | Low risk                      | Low risk            | Moderate risk                           | High risk                          |
| Martín-Moro et al, 2020 <sup>253</sup>       | Spain       | Moderate risk       | Low risk        | High risk                     | Low risk            | High risk                               | High risk                          |
| Martín-Sánchez et al, 2020 <sup>254</sup>    | Spain       | Low risk            | Low risk        | Low risk                      | Low risk            | High risk                               | High risk                          |
| Marta-Enguita et al, 2020 <sup>255</sup>     | Spain       | High risk           | Low risk        | High risk                     | Low risk            | High risk                               | High risk                          |
| Marzolini et al, 2020 <sup>256</sup>         | Switzerland | High risk           | Low risk        | Low risk                      | Low risk            | High risk                               | High risk                          |
| Masetti et al, 2020 <sup>257</sup>           | Italy       | High risk           | Low risk        | Moderate risk                 | Low risk            | High risk                               | High risk                          |
| McCullough et al, 2020 <sup>258</sup>        | USA         | High risk           | Low risk        | High risk                     | Low risk            | High risk                               | High risk                          |
| Medetalibeyoğlu et al, 2020 <sup>259</sup>   | Turkey      | High risk           | Low risk        | Low risk                      | Low risk            | High risk                               | High risk                          |
| Mendoza et al, 2020 <sup>260</sup>           | Spain       | High risk           | Low risk        | High risk                     | Low risk            | High risk                               | High risk                          |

| First Author, Year                        | Country     | Study participation | Study attrition | Prognostic factor measurement | Outcome measurement | Adjustment for other prognostic factors | Statistical analysis and reporting |
|-------------------------------------------|-------------|---------------------|-----------------|-------------------------------|---------------------|-----------------------------------------|------------------------------------|
| Merzon et al, 2020 <sup>261</sup>         | Israel      | High risk           | Low risk        | High risk                     | Low risk            | Moderate risk                           | High risk                          |
| Mestre-Gómez et al, 2021 <sup>262</sup>   | Spain       | High risk           | Low risk        | Moderate risk                 | Low risk            | High risk                               | High risk                          |
| Meszaros et al, 2020 <sup>263</sup>       | France      | High risk           | Low risk        | Low risk                      | Low risk            | High risk                               | High risk                          |
| Middeldorp et al, 2020 <sup>264</sup>     | Netherlands | Moderate risk       | Low risk        | Moderate risk                 | Low risk            | High risk                               | High risk                          |
| Mikami et al, 2021 <sup>265</sup>         | USA         | Moderate risk       | Low risk        | High risk                     | Low risk            | High risk                               | High risk                          |
| Mishra et al, 2020 <sup>266</sup>         | India       | High risk           | Low risk        | Low risk                      | Low risk            | High risk                               | Moderate risk                      |
| Miyashita et al, 2020 <sup>267</sup>      | USA         | Moderate risk       | Low risk        | Moderate risk                 | Low risk            | High risk                               | High risk                          |
| Miyashita et al, 2020 <sup>268</sup>      | USA         | High risk           | Low risk        | Moderate risk                 | Low risk            | High risk                               | High risk                          |
| Moghaddam et al, 2020 <sup>269</sup>      | Germany     | High risk           | Low risk        | Moderate risk                 | Low risk            | High risk                               | High risk                          |
| Montagnani et al, 2020 <sup>270</sup>     | Italy       | High risk           | Low risk        | Moderate risk                 | Low risk            | High risk                               | High risk                          |
| Montastruc et al, 2020 <sup>271</sup>     | France      | High risk           | Low risk        | Moderate risk                 | Low risk            | High risk                               | High risk                          |
| Montopoli et al, 2020 <sup>272</sup>      | Italy       | High risk           | Low risk        | Low risk                      | Low risk            | High risk                               | High risk                          |
| Moreno-Perez et al, 2020 <sup>273</sup>   | Spain       | High risk           | Low risk        | High risk                     | Low risk            | High risk                               | High risk                          |
| Moriconi et al, 2020 <sup>274</sup>       | Italy       | Low risk            | Low risk        | High risk                     | Low risk            | High risk                               | High risk                          |
| Morrison et al, 2020 <sup>275</sup>       | USA         | High risk           | Low risk        | High risk                     | Low risk            | High risk                               | High risk                          |
| Myers et al, 2020 <sup>276</sup>          | USA         | High risk           | Low risk        | High risk                     | Low risk            | High risk                               | High risk                          |
| Myrstad et al, 2020 <sup>277</sup>        | Norway      | High risk           | Low risk        | High risk                     | Low risk            | High risk                               | High risk                          |
| Nahum et al, 2020 <sup>278</sup>          | France      | Low risk            | Low risk        | Moderate risk                 | Low risk            | High risk                               | High risk                          |
| Nathwani et al, 2020 <sup>279</sup>       | UK          | High risk           | Low risk        | Moderate risk                 | Low risk            | High risk                               | High risk                          |
| Nie et al, 2020 <sup>280</sup>            | China       | High risk           | Low risk        | High risk                     | Low risk            | High risk                               | High risk                          |
| Nie et al, 2020 <sup>281</sup>            | China       | High risk           | Low risk        | Moderate risk                 | Low risk            | High risk                               | High risk                          |
| Nikpourghdam et al, 2020 <sup>282</sup>   | Iran        | High risk           | Low risk        | Moderate risk                 | Low risk            | High risk                               | High risk                          |
| Nobel et al, 2020 <sup>283</sup>          | USA         | High risk           | Low risk        | High risk                     | Low risk            | High risk                               | High risk                          |
| Nowak et al, 2020 <sup>284</sup>          | Poland      | Low risk            | Low risk        | High risk                     | Low risk            | High risk                               | High risk                          |
| Nuno et al, 2020 <sup>285</sup>           | Spain       | High risk           | Low risk        | High risk                     | Low risk            | High risk                               | High risk                          |
| Okoh et al, 2020 <sup>286</sup>           | USA         | High risk           | Low risk        | High risk                     | Low risk            | High risk                               | High risk                          |
| Ortiz-Brizuela et al, 2020 <sup>287</sup> | Mexico      | Low risk            | Low risk        | High risk                     | Low risk            | High risk                               | High risk                          |
| Oussalah et al, 2020 <sup>288</sup>       | France      | High risk           | Low risk        | Moderate risk                 | Low risk            | High risk                               | High risk                          |
| Paderno et al, 2020 <sup>289</sup>        | Italy       | High risk           | Low risk        | High risk                     | Low risk            | High risk                               | High risk                          |
| Palaiodimos et al, 2020 <sup>290</sup>    | USA         | High risk           | Low risk        | High risk                     | Low risk            | High risk                               | High risk                          |
| Panagiotou et al, 2020 <sup>291</sup>     | UK          | High risk           | Low risk        | High risk                     | Low risk            | High risk                               | High risk                          |
| Panepinto et al, 2020 <sup>292</sup>      | USA         | High risk           | Low risk        | Moderate risk                 | Low risk            | High risk                               | High risk                          |
| Parrotta et al, 2020 <sup>293</sup>       | USA         | High risk           | Low risk        | Moderate risk                 | Low risk            | High risk                               | High risk                          |
| Patel et al, 2020 <sup>294</sup>          | UK          | High risk           | Low risk        | High risk                     | Low risk            | High risk                               | High risk                          |
| Patell et al, 2020 <sup>295</sup>         | USA         | High risk           | Low risk        | Moderate risk                 | Low risk            | High risk                               | High risk                          |
| Pelayo et al, 2020 <sup>296</sup>         | USA         | High risk           | Low risk        | Moderate risk                 | Low risk            | Moderate risk                           | High risk                          |
| Pellaud et al, 2020 <sup>297</sup>        | Switzerland | Low risk            | Low risk        | High risk                     | Low risk            | High risk                               | High risk                          |
| Peng et al, 2020 <sup>298</sup>           | China       | High risk           | Low risk        | Low risk                      | Low risk            | High risk                               | High risk                          |

| First Author, Year                          | Country | Study participation | Study attrition | Prognostic factor measurement | Outcome measurement | Adjustment for other prognostic factors | Statistical analysis and reporting |
|---------------------------------------------|---------|---------------------|-----------------|-------------------------------|---------------------|-----------------------------------------|------------------------------------|
| Pereira et al, 2020 <sup>299</sup>          | USA     | Moderate risk       | Low risk        | Moderate risk                 | Low risk            | High risk                               | High risk                          |
| Pérez-Sáez et al, 2020 <sup>300</sup>       | Spain   | High risk           | Low risk        | High risk                     | Low risk            | High risk                               | High risk                          |
| Petersen et al, 2020 <sup>301</sup>         | Germany | High risk           | Low risk        | Low risk                      | Low risk            | High risk                               | High risk                          |
| Petrilli et al, 2020 <sup>302</sup>         | USA     | Moderate risk       | Low risk        | Moderate risk                 | Low risk            | High risk                               | High risk                          |
| Pettit et al, 2020 <sup>303</sup>           | USA     | High risk           | Low risk        | High risk                     | High risk           | Moderate risk                           | High risk                          |
| Piano et al, 2020 <sup>304</sup>            | Italy   | High risk           | Low risk        | High risk                     | Low risk            | High risk                               | High risk                          |
| Pinto et al, 2020 <sup>305</sup>            | Italy   | Low risk            | Low risk        | Low risk                      | Low risk            | Moderate risk                           | High risk                          |
| Poblador-Plou et al, 2020 <sup>306</sup>    | Spain   | Low risk            | Low risk        | High risk                     | Low risk            | Moderate risk                           | High risk                          |
| Ponziani et al, 2020 <sup>307</sup>         | Italy   | Low risk            | Low risk        | High risk                     | Low risk            | High risk                               | High risk                          |
| Poyiadji et al, 2020 <sup>308</sup>         | USA     | High risk           | Low risk        | Moderate risk                 | Low risk            | High risk                               | High risk                          |
| Qian et al, 2020 <sup>309</sup>             | China   | Low risk            | Low risk        | Low risk                      | Low risk            | High risk                               | High risk                          |
| Qin et al, 2020 <sup>310</sup>              | China   | Moderate risk       | Low risk        | Moderate risk                 | Low risk            | High risk                               | High risk                          |
| Qin et al, 2020 <sup>311</sup>              | China   | High risk           | Low risk        | High risk                     | Low risk            | Moderate risk                           | Moderate risk                      |
| Quartuccio et al, 2020 <sup>312</sup>       | Italy   | High risk           | Low risk        | Moderate risk                 | Low risk            | High risk                               | High risk                          |
| Ramachandran et al, 2020 <sup>313</sup>     | USA     | High risk           | High risk       | High risk                     | Low risk            | High risk                               | High risk                          |
| Raoufi et al, 2020 <sup>314</sup>           | Iran    | High risk           | Low risk        | High risk                     | Low risk            | High risk                               | High risk                          |
| Rastad et al, 2020 <sup>315</sup>           | Iran    | High risk           | Low risk        | High risk                     | Low risk            | High risk                               | High risk                          |
| Rath et al, 2020 <sup>316</sup>             | Germany | Low risk            | Low risk        | High risk                     | Low risk            | High risk                               | High risk                          |
| Redd et al, 2020 <sup>317</sup>             | USA     | Low risk            | Low risk        | High risk                     | Low risk            | High risk                               | High risk                          |
| Ren et al, 2020 <sup>318</sup>              | China   | High risk           | Low risk        | Moderate risk                 | Low risk            | High risk                               | High risk                          |
| Richardson et al, 2020 <sup>319</sup>       | USA     | Low risk            | Low risk        | Moderate risk                 | Low risk            | High risk                               | High risk                          |
| Rivera-Izquierdo et al, 2020 <sup>320</sup> | Spain   | High risk           | Low risk        | High risk                     | Low risk            | High risk                               | High risk                          |
| Rivera-Izquierdo et al, 2020 <sup>321</sup> | Spain   | High risk           | Low risk        | High risk                     | Low risk            | High risk                               | Moderate risk                      |
| Robilotti et al, 2020 <sup>322</sup>        | USA     | Moderate risk       | Low risk        | High risk                     | Low risk            | High risk                               | High risk                          |
| Rogado et al, 2020 <sup>323</sup>           | Spain   | Moderate risk       | Low risk        | High risk                     | Low risk            | High risk                               | High risk                          |
| Roman et al, 2020 <sup>324</sup>            | Spain   | High risk           | Low risk        | High risk                     | Low risk            | High risk                               | Moderate risk                      |
| Rosenberg et al, 2020 <sup>325</sup>        | USA     | Moderate risk       | Low risk        | High risk                     | Low risk            | High risk                               | High risk                          |
| Rossi et al, 2020 <sup>326</sup>            | Italy   | Moderate risk       | Low risk        | Moderate risk                 | Low risk            | High risk                               | High risk                          |
| Rottoli et al, 2020 <sup>327</sup>          | Italy   | High risk           | Low risk        | High risk                     | Low risk            | Moderate risk                           | High risk                          |
| Rubin et al, 2020 <sup>328</sup>            | France  | Moderate risk       | Low risk        | Low risk                      | Low risk            | High risk                               | High risk                          |
| Russo et al, 2020 <sup>329</sup>            | Italy   | High risk           | Low risk        | High risk                     | Low risk            | High risk                               | High risk                          |
| Sabri et al, 2020 <sup>330</sup>            | Iran    | High risk           | Low risk        | High risk                     | Low risk            | High risk                               | High risk                          |
| Salacup et al, 2020 <sup>331</sup>          | USA     | High risk           | Low risk        | High risk                     | Low risk            | Moderate risk                           | High risk                          |
| Saluja et al, 2020 <sup>332</sup>           | India   | High risk           | Low risk        | High risk                     | Low risk            | High risk                               | High risk                          |
| Sanchez-Pina et al, 2020 <sup>333</sup>     | Spain   | Moderate risk       | Low risk        | High risk                     | Low risk            | High risk                               | High risk                          |
| Santoliquido et al, 2020 <sup>334</sup>     | Italy   | High risk           | Low risk        | Moderate risk                 | Low risk            | High risk                               | High risk                          |
| Sardu et al, 2020 <sup>335</sup>            | Italy   | High risk           | Low risk        | Moderate risk                 | Low risk            | High risk                               | High risk                          |

| First Author, Year                       | Country    | Study participation | Study attrition | Prognostic factor measurement | Outcome measurement | Adjustment for other prognostic factors | Statistical analysis and reporting |
|------------------------------------------|------------|---------------------|-----------------|-------------------------------|---------------------|-----------------------------------------|------------------------------------|
| Sardu et al, 2020 <sup>336</sup>         | Italy      | High risk           | Low risk        | Low risk                      | High risk           | High risk                               | High risk                          |
| Satici et al, 2020 <sup>337</sup>        | Turkey     | Low risk            | Low risk        | High risk                     | Low risk            | High risk                               | High risk                          |
| Secco et al, 2020 <sup>338</sup>         | Italy      | High risk           | Low risk        | Moderate risk                 | Low risk            | High risk                               | High risk                          |
| Selcuk et al, 2020 <sup>339</sup>        | Turkey     | High risk           | Low risk        | Moderate risk                 | Low risk            | High risk                               | High risk                          |
| Semenova et al, 2020 <sup>340</sup>      | Kazakhstan | Low risk            | Low risk        | Low risk                      | Low risk            | High risk                               | High risk                          |
| Shah et al, 2020 <sup>341</sup>          | UK         | High risk           | Low risk        | High risk                     | Low risk            | High risk                               | High risk                          |
| Shah et al, 2020 <sup>342</sup>          | USA        | High risk           | Low risk        | High risk                     | Low risk            | Moderate risk                           | High risk                          |
| Shahriarirad et al, 2020 <sup>343</sup>  | Iran       | Low risk            | Low risk        | High risk                     | Low risk            | High risk                               | High risk                          |
| Shang et al, 2020 <sup>344</sup>         | China      | High risk           | Low risk        | Low risk                      | Low risk            | High risk                               | High risk                          |
| Shekhar et al, 2020 <sup>345</sup>       | USA        | Low risk            | Low risk        | High risk                     | Low risk            | High risk                               | High risk                          |
| Shen et al, 2020 <sup>346</sup>          | China      | High risk           | Low risk        | High risk                     | Low risk            | High risk                               | High risk                          |
| Shi et al, 2020 <sup>347</sup>           | China      | High risk           | Low risk        | Moderate risk                 | Low risk            | High risk                               | High risk                          |
| Simmonet et al, 2020 <sup>348</sup>      | France     | Low risk            | Low risk        | Moderate risk                 | Low risk            | Moderate risk                           | High risk                          |
| Singer et al, 2020 <sup>349</sup>        | USA        | Low risk            | Low risk        | High risk                     | Low risk            | High risk                               | High risk                          |
| Smadja et al, 2020 <sup>350</sup>        | France     | High risk           | Low risk        | High risk                     | Low risk            | High risk                               | High risk                          |
| Smith et al, 2020 <sup>351</sup>         | USA        | High risk           | Low risk        | Moderate risk                 | Low risk            | High risk                               | High risk                          |
| Soares et al, 2020 <sup>352</sup>        | Brazil     | High risk           | Low risk        | High risk                     | Low risk            | Moderate risk                           | High risk                          |
| Sohaib Asghar et al, 2020 <sup>353</sup> | Pakistan   | Low risk            | Low risk        | High risk                     | Low risk            | High risk                               | High risk                          |
| Solaimanzadeh et al, 2020 <sup>354</sup> | USA        | High risk           | Low risk        | Low risk                      | Low risk            | High risk                               | High risk                          |
| Somers et al, 2020 <sup>355</sup>        | Michigan   | High risk           | Low risk        | High risk                     | Low risk            | High risk                               | Moderate risk                      |
| Sousa et al, 2020 <sup>356</sup>         | Brazil     | Low risk            | Low risk        | Moderate risk                 | Low risk            | Moderate risk                           | High risk                          |
| Stevens et al, 2021 <sup>357</sup>       | USA        | High risk           | Low risk        | High risk                     | Low risk            | High risk                               | High risk                          |
| Stoneham et al, 2020 <sup>358</sup>      | UK         | High risk           | Low risk        | Moderate risk                 | High risk           | High risk                               | High risk                          |
| Stroppa et al, 2020 <sup>359</sup>       | Italy      | Moderate risk       | Low risk        | High risk                     | Low risk            | High risk                               | High risk                          |
| Suleyman et al, 2020 <sup>360</sup>      | USA        | Low risk            | Low risk        | High risk                     | Low risk            | High risk                               | High risk                          |
| Sun et al, 2020 <sup>361</sup>           | China      | High risk           | Low risk        | High risk                     | Low risk            | High risk                               | High risk                          |
| Sun et al, 2020 <sup>362</sup>           | China      | High risk           | Low risk        | High risk                     | Low risk            | High risk                               | High risk                          |
| Sun et al, 2020 <sup>363</sup>           | China      | High risk           | Low risk        | High risk                     | Low risk            | High risk                               | High risk                          |
| Tambe et al, 2020 <sup>364</sup>         | India      | Low risk            | Low risk        | Moderate risk                 | Low risk            | High risk                               | High risk                          |
| Tan et al, 2020 <sup>365</sup>           | China      | High risk           | Low risk        | Low risk                      | Low risk            | High risk                               | High risk                          |
| Tan et al, 2020 <sup>366</sup>           | UK         | High risk           | Low risk        | Moderate risk                 | Low risk            | Moderate risk                           | Moderate risk                      |
| Tanriverdi et al, 2020 <sup>367</sup>    | Turkey     | High risk           | Low risk        | High risk                     | Low risk            | High risk                               | High risk                          |
| Tatum et al, 2020 <sup>368</sup>         | USA        | High risk           | Low risk        | High risk                     | Low risk            | High risk                               | High risk                          |
| Tenforde et al, 2020 <sup>369</sup>      | USA        | High risk           | Low risk        | High risk                     | Low risk            | High risk                               | High risk                          |
| Tharakan et al, 2020 <sup>370</sup>      | USA        | High risk           | Low risk        | Low risk                      | Low risk            | High risk                               | High risk                          |
| Tomlins et al, 2020 <sup>371</sup>       | UK         | Low risk            | Low risk        | High risk                     | Low risk            | High risk                               | High risk                          |
| Toussie et al, 2020 <sup>372</sup>       | USA        | Moderate risk       | Low risk        | High risk                     | Low risk            | High risk                               | High risk                          |
| Trimaille et al, 2020 <sup>373</sup>     | France     | Moderate risk       | Low risk        | High risk                     | High risk           | High risk                               | High risk                          |
| Trujillo et al, 2020 <sup>374</sup>      | Spain      | Moderate risk       | Low risk        | High risk                     | Low risk            | High risk                               | High risk                          |

| First Author, Year                    | Country   | Study participation | Study attrition | Prognostic factor measurement | Outcome measurement | Adjustment for other prognostic factors | Statistical analysis and reporting |
|---------------------------------------|-----------|---------------------|-----------------|-------------------------------|---------------------|-----------------------------------------|------------------------------------|
| Urta et al, 2020 <sup>375</sup>       | Spain     | High risk           | Low risk        | Moderate risk                 | Low risk            | High risk                               | High risk                          |
| Valeri et al, 2020 <sup>376</sup>     | USA       | Moderate risk       | Low risk        | High risk                     | Low risk            | High risk                               | High risk                          |
| van Gerwen et al, 2020 <sup>377</sup> | USA       | High risk           | Low risk        | High risk                     | Low risk            | Moderate risk                           | High risk                          |
| Villard et al, 2020 <sup>378</sup>    | France    | High risk           | Low risk        | High risk                     | High risk           | High risk                               | High risk                          |
| Vivanti et al, 2020 <sup>379</sup>    | France    | Low risk            | Low risk        | High risk                     | Low risk            | High risk                               | High risk                          |
| Wan et al, 2020 <sup>380</sup>        | China     | High risk           | Low risk        | High risk                     | Low risk            | High risk                               | High risk                          |
| Wang et al, 2020 <sup>381</sup>       | China     | Low risk            | Low risk        | High risk                     | Low risk            | High risk                               | High risk                          |
| Wang et al, 2020 <sup>382</sup>       | China     | Low risk            | Low risk        | High risk                     | Low risk            | High risk                               | High risk                          |
| Wang et al, 2020 <sup>383</sup>       | China     | Low risk            | Low risk        | High risk                     | Low risk            | High risk                               | High risk                          |
| Wang et al, 2020 <sup>384</sup>       | China     | High risk           | Low risk        | High risk                     | Low risk            | High risk                               | High risk                          |
| Wang et al, 2020 <sup>385</sup>       | China     | High risk           | Low risk        | High risk                     | Low risk            | High risk                               | High risk                          |
| Wang et al, 2020 <sup>386</sup>       | China     | High risk           | Low risk        | High risk                     | Low risk            | High risk                               | High risk                          |
| Wang et al, 2020 <sup>387</sup>       | China     | High risk           | Low risk        | High risk                     | Low risk            | High risk                               | High risk                          |
| Wang et al, 2020 <sup>388</sup>       | China     | High risk           | Low risk        | High risk                     | Low risk            | High risk                               | High risk                          |
| Wang et al, 2020 <sup>389</sup>       | China     | High risk           | Low risk        | Moderate risk                 | Low risk            | High risk                               | High risk                          |
| Wang et al, 2020 <sup>390</sup>       | USA       | High risk           | Low risk        | Moderate risk                 | Low risk            | High risk                               | High risk                          |
| Whyte et al, 2020 <sup>391</sup>      | UK        | High risk           | Low risk        | Moderate risk                 | Low risk            | High risk                               | High risk                          |
| Wu et al, 2020 <sup>392</sup>         | China     | High risk           | Low risk        | High risk                     | Low risk            | High risk                               | Moderate risk                      |
| Wu et al, 2020 <sup>393</sup>         | China     | High risk           | Low risk        | Low risk                      | Low risk            | High risk                               | High risk                          |
| Xu et al, 2020 <sup>394</sup>         | China     | High risk           | Low risk        | High risk                     | Low risk            | High risk                               | High risk                          |
| Xu et al, 2020 <sup>395</sup>         | China     | High risk           | Low risk        | High risk                     | Low risk            | High risk                               | High risk                          |
| Xu et al, 2020 <sup>396</sup>         | China     | High risk           | Low risk        | Low risk                      | Low risk            | High risk                               | High risk                          |
| Yan et al, 2020 <sup>397</sup>        | USA       | High risk           | Low risk        | High risk                     | Low risk            | High risk                               | High risk                          |
| Yan et al, 2020 <sup>398</sup>        | China     | High risk           | Low risk        | Moderate risk                 | Low risk            | High risk                               | High risk                          |
| Yang et al, 2020 <sup>399</sup>       | China     | High risk           | Low risk        | High risk                     | Low risk            | High risk                               | High risk                          |
| Yang et al, 2020 <sup>400</sup>       | China     | High risk           | Low risk        | Low risk                      | Low risk            | High risk                               | High risk                          |
| Yang et al, 2020 <sup>401</sup>       | China     | High risk           | Low risk        | High risk                     | Low risk            | High risk                               | High risk                          |
| Yang et al, 2020 <sup>402</sup>       | USA       | High risk           | Low risk        | Low risk                      | Low risk            | High risk                               | High risk                          |
| Yao et al, 2020 <sup>403</sup>        | China     | Low risk            | Low risk        | High risk                     | Low risk            | High risk                               | High risk                          |
| Yao et al, 2020 <sup>404</sup>        | China     | High risk           | Low risk        | Low risk                      | Low risk            | High risk                               | High risk                          |
| Yarza et al, 2020 <sup>405</sup>      | Spain     | High risk           | Low risk        | High risk                     | High risk           | High risk                               | High risk                          |
| Ye et al, 2020 <sup>406</sup>         | China     | Moderate risk       | Low risk        | Moderate risk                 | Low risk            | High risk                               | High risk                          |
| Ye et al, 2020 <sup>407</sup>         | China     | High risk           | Low risk        | High risk                     | Low risk            | High risk                               | High risk                          |
| Yip et al, 2020 <sup>408</sup>        | Hong Kong | High risk           | Low risk        | Moderate risk                 | Low risk            | High risk                               | High risk                          |
| Yu et al, 2020 <sup>409</sup>         | China     | High risk           | Low risk        | High risk                     | Low risk            | High risk                               | High risk                          |
| Yu et al, 2020 <sup>410</sup>         | China     | High risk           | Low risk        | High risk                     | Low risk            | High risk                               | High risk                          |
| Yuan et al, 2020 <sup>411</sup>       | China     | High risk           | Low risk        | High risk                     | Low risk            | High risk                               | High risk                          |
| Zeng et al, 2020 <sup>412</sup>       | China     | High risk           | Low risk        | High risk                     | Low risk            | High risk                               | High risk                          |
| Zeng et al, 2020 <sup>413</sup>       | China     | High risk           | Low risk        | Moderate risk                 | Low risk            | High risk                               | Moderate risk                      |

| First Author, Year               | Country | Study participation | Study attrition | Prognostic factor measurement | Outcome measurement | Adjustment for other prognostic factors | Statistical analysis and reporting |
|----------------------------------|---------|---------------------|-----------------|-------------------------------|---------------------|-----------------------------------------|------------------------------------|
| Zhang et al, 2020 <sup>414</sup> | China   | High risk           | Low risk        | Moderate risk                 | Low risk            | Moderate risk                           | Moderate risk                      |
| Zhang et al, 2020 <sup>415</sup> | China   | Low risk            | Low risk        | High risk                     | Low risk            | High risk                               | High risk                          |
| Zhang et al, 2020 <sup>416</sup> | China   | High risk           | Low risk        | Moderate risk                 | High risk           | High risk                               | High risk                          |
| Zhang et al, 2020 <sup>417</sup> | China   | High risk           | Low risk        | High risk                     | Low risk            | High risk                               | High risk                          |
| Zhang et al, 2020 <sup>418</sup> | China   | High risk           | Low risk        | High risk                     | Low risk            | High risk                               | High risk                          |
| Zhang et al, 2020 <sup>419</sup> | China   | High risk           | Low risk        | High risk                     | Low risk            | High risk                               | High risk                          |
| Zhang et al, 2020 <sup>420</sup> | China   | High risk           | Low risk        | High risk                     | Low risk            | High risk                               | High risk                          |
| Zhao et al, 2020 <sup>421</sup>  | China   | High risk           | Low risk        | Low risk                      | Low risk            | High risk                               | High risk                          |
| Zheng et al, 2020 <sup>422</sup> | China   | High risk           | Low risk        | High risk                     | Low risk            | High risk                               | High risk                          |
| Zheng et al, 2020 <sup>423</sup> | China   | High risk           | Low risk        | High risk                     | Low risk            | Moderate risk                           | Moderate risk                      |
| Zhou et al, 2020 <sup>424</sup>  | China   | High risk           | Low risk        | High risk                     | Low risk            | High risk                               | High risk                          |
| Zhou et al, 2020 <sup>425</sup>  | China   | High risk           | Low risk        | High risk                     | Low risk            | High risk                               | High risk                          |
| Zhou et al, 2020 <sup>426</sup>  | China   | High risk           | Low risk        | Low risk                      | Low risk            | Moderate risk                           | High risk                          |
| Zhu et al, 2020 <sup>427</sup>   | China   | High risk           | Low risk        | Moderate risk                 | Low risk            | High risk                               | High risk                          |
| Zou et al, 2020 <sup>428</sup>   | China   | High risk           | Low risk        | High risk                     | Low risk            | High risk                               | High risk                          |

**Note:** For studies examining multiple prognostic factors and/or outcomes, we assessed the pertinent question with the highest risk of bias grade for the ascertainment of the prognostic factor and outcome.

**Supplementary Table S2.** Results of the 263 meta-analyses for predictors of clinical outcomes in patients with COVID-19.

| Category of predictor                               | Predictor                   | Level of comparison                             | N events/N participants | N studies | RE summary OR (95% CI) | P-value                | I <sup>2</sup> | 95% PI        | Egger's test P-value |
|-----------------------------------------------------|-----------------------------|-------------------------------------------------|-------------------------|-----------|------------------------|------------------------|----------------|---------------|----------------------|
| <i>Acute Kidney Injury</i>                          |                             |                                                 |                         |           |                        |                        |                |               |                      |
| Comorbidities                                       | Cancer                      | Yes vs. No                                      | 4123/10,960             | 6         | 1.55 (1.07 - 2.25)     | $1.98 \times 10^{-2}$  | 37             | 0.63 - 3.83   | 0.082†               |
| Comorbidities                                       | Chronic kidney disease      | Yes vs. No                                      | 2173/4992               | 5         | 2.46 (1.75 - 3.46)     | $2.54 \times 10^{-7}$  | 28             | 1.04 - 5.81   | 0.053†               |
| Comorbidities                                       | COPD                        | Yes vs. No                                      | 2213/5842               | 5         | 1.34 (0.83 - 2.18)     | $2.31 \times 10^{-1}$  | 23             | 0.40 - 4.47   | 0.236                |
| Comorbidities                                       | Coronary heart disease      | Yes vs. No                                      | 2213/5842               | 5         | 1.69 (1.43 - 1.99)     | $4.90 \times 10^{-10}$ | 0              | 1.29 - 2.20   | 0.201                |
| Comorbidities                                       | Diabetes mellitus           | Yes vs. No                                      | 4938/20,881             | 12        | 1.95 (1.57 - 2.43)     | $1.43 \times 10^{-9}$  | 73             | 1.04 - 3.69   | 0.396                |
| Comorbidities                                       | Heart failure               | Yes vs. No                                      | 4062/9228               | 5         | 2.26 (1.50 - 3.41)     | $9.95 \times 10^{-5}$  | 52             | 0.71 - 7.15   | 0.727                |
| Comorbidities                                       | Hypertension                | Yes vs. No                                      | 2842/13,088*            | 9         | 2.26 (1.69 - 3.03)     | $4.87 \times 10^{-8}$  | 73             | 0.99 - 5.16   | 0.343                |
| Demographics                                        | Sex                         | Female vs. Male                                 | 4203/9418               | 8         | 0.73 (0.61 - 0.87)     | $4.82 \times 10^{-4}$  | 40             | 0.49 - 1.07   | 0.247                |
| Medications                                         | ACEi/ARBs                   | Yes vs. No                                      | 4548/12,944*            | 10        | 1.29 (1.08 - 1.53)     | $4.06 \times 10^{-3}$  | 38             | 0.87 - 1.92   | 0.260                |
| <i>Acute Respiratory Distress Syndrome</i>          |                             |                                                 |                         |           |                        |                        |                |               |                      |
| Comorbidities                                       | Diabetes mellitus           | Yes vs. No                                      | 957/8366                | 9         | 2.33 (1.77 - 3.06)     | $1.87 \times 10^{-9}$  | 26             | 1.30 - 4.16   | 0.849                |
| Comorbidities                                       | Hypertension                | Yes vs. No                                      | 494/5980*               | 9         | 2.13 (1.50 - 3.03)     | $2.23 \times 10^{-5}$  | 66             | 0.81 - 5.64   | 0.113                |
| Demographics                                        | Sex                         | Female vs. Male                                 | 366/1186                | 7         | 0.78 (0.48 - 1.25)     | $3.00 \times 10^{-1}$  | 61             | 0.19 - 3.14   | 0.076                |
| Environmental factors                               | Smoking                     | Yes vs. No                                      | 189/481                 | 5         | 0.73 (0.39 - 1.38)     | $3.38 \times 10^{-1}$  | 0              | 0.26 - 2.05   | 0.641                |
| Medications                                         | ACEi/ARBs                   | Yes vs. No                                      | 252/2015*               | 8         | 0.80 (0.62 - 1.03)     | $7.90 \times 10^{-2}$  | 0              | 0.58 - 1.09   | 0.546                |
| <i>Composite Outcome 1 (ICU admission or Death)</i> |                             |                                                 |                         |           |                        |                        |                |               |                      |
| Comorbidities                                       | Any comorbidity             | Yes vs. No                                      | 400/1077                | 7         | 1.50 (1.11 - 2.03)     | $8.00 \times 10^{-3}$  | 0              | 1.01 - 2.22   | 0.337                |
| Comorbidities                                       | BMI                         | >30 kg/m <sup>2</sup> vs. <30 kg/m <sup>2</sup> | 562/1595                | 6         | 1.20 (0.96 - 1.50)     | $1.01 \times 10^{-1}$  | 0              | 0.88 - 1.64   | 0.781                |
| Comorbidities                                       | Cancer                      | Yes vs. No                                      | 1098/4129               | 13        | 1.49 (1.02 - 2.19)     | $4.10 \times 10^{-2}$  | 53             | 0.49 - 4.56   | 0.835                |
| Comorbidities                                       | Cardiovascular disease      | Yes vs. No                                      | 739/3129                | 8         | 1.74 (1.06 - 2.86)     | $2.90 \times 10^{-2}$  | 78             | 0.38 - 7.95   | 0.146                |
| Comorbidities                                       | Chronic kidney disease      | Yes vs. No                                      | 1166/4436               | 13        | 1.78 (1.29 - 2.46)     | $4.26 \times 10^{-4}$  | 39             | 0.77 - 4.11   | 0.961                |
| Comorbidities                                       | COPD                        | Yes vs. No                                      | 732/3234                | 8         | 2.04 (1.30 - 3.19)     | $1.98 \times 10^{-3}$  | 51             | 0.62 - 6.71   | 0.672                |
| Comorbidities                                       | Coronary heart disease      | Yes vs. No                                      | 420/1276                | 5         | 2.38 (1.37 - 4.13)     | $2.16 \times 10^{-3}$  | 68             | 0.38 - 14.95  | 0.386                |
| Comorbidities                                       | Diabetes mellitus           | Yes vs. No                                      | 1327/4910               | 15        | 1.85 (1.42 - 2.42)     | $5.51 \times 10^{-6}$  | 59             | 0.80 - 4.30   | 0.691                |
| Comorbidities                                       | Heart failure               | Yes vs. No                                      | 340/866                 | 5         | 0.83 (0.50 - 1.39)     | $4.86 \times 10^{-1}$  | 1              | 0.35 - 1.96   | 0.895                |
| Comorbidities                                       | Hypertension                | Yes vs. No                                      | 1073/4313               | 13        | 1.68 (1.13 - 2.48)     | $9.72 \times 10^{-3}$  | 81             | 0.42 - 6.75   | 0.254                |
| Comorbidities                                       | Solid organ transplantation | Yes vs. No                                      | 478/1284                | 5         | 1.09 (0.53 - 2.24)     | $8.19 \times 10^{-1}$  | 0              | 0.34 - 3.52   | 0.889                |
| Demographics                                        | Age                         | per 1 year increase                             | 578/1663                | 5         | 1.015 (1.003 - 1.028)  | $1.70 \times 10^{-2}$  | 58             | 0.977 - 1.055 | 0.788                |
| Demographics                                        | Sex                         | Female vs. Male                                 | 1493/5593               | 18        | 0.70 (0.60 - 0.82)     | $1.12 \times 10^{-5}$  | 23             | 0.48 - 1.02   | 0.935                |
| Environmental factors                               | Smoking                     | Yes vs. No                                      | 359/961                 | 8         | 1.20 (0.82 - 1.74)     | $3.49 \times 10^{-1}$  | 0              | 0.75 - 1.90   | 0.692                |
| Medications                                         | ACEi                        | Yes vs. No                                      | 586/2867                | 5         | 1.44 (0.86 - 2.39)     | $1.63 \times 10^{-1}$  | 70             | 0.27 - 7.67   | 0.384                |
| Medications                                         | ACEi/ARBs                   | Yes vs. No                                      | 1591/7694               | 6         | 1.67 (0.92 - 3.01)     | $8.93 \times 10^{-2}$  | 94             | 0.22 - 12.87  | 0.540                |
| Medications                                         | ARBs                        | Yes vs. No                                      | 586/2867                | 5         | 1.23 (0.69 - 2.20)     | $4.86 \times 10^{-1}$  | 77             | 0.18 - 8.53   | 0.241                |

| Category of predictor                                                       | Predictor                   | Level of comparison                             | N events/N participants | N studies | RE summary OR (95% CI) | P-value                | I <sup>2</sup> | 95% PI        | Egger's test P-value |
|-----------------------------------------------------------------------------|-----------------------------|-------------------------------------------------|-------------------------|-----------|------------------------|------------------------|----------------|---------------|----------------------|
| Symptoms/signs                                                              | Cough                       | Yes vs. No                                      | 449/1330                | 7         | 0.89 (0.63 - 1.26)     | $5.11 \times 10^{-1}$  | 40             | 0.38 - 2.08   | 0.555                |
| Symptoms/signs                                                              | Dyspnea                     | Yes vs. No                                      | 475/1380                | 7         | 2.15 (1.67 - 2.77)     | $2.15 \times 10^{-9}$  | 1              | 1.52 - 3.04   | 0.449                |
| Symptoms/signs                                                              | Fever                       | Yes vs. No                                      | 790/2381                | 9         | 1.18 (0.82 - 1.71)     | $3.71 \times 10^{-1}$  | 51             | 0.45 - 3.11   | 0.731                |
| <i>Composite Outcome 2 (ICU admission, Mechanical Ventilation or Death)</i> |                             |                                                 |                         |           |                        |                        |                |               |                      |
| Comorbidities                                                               | Any comorbidity             | Yes vs. No                                      | 1084/4633*              | 7         | 2.90 (1.72 - 4.90)     | $7.03 \times 10^{-5}$  | 67             | 0.63 - 13.31  | 0.048†               |
| Comorbidities                                                               | Diabetes mellitus           | Yes vs. No                                      | 1422/5658               | 9         | 2.09 (1.18 - 3.71)     | $1.14 \times 10^{-2}$  | 88             | 0.30 - 14.41  | 0.310                |
| Comorbidities                                                               | Hypertension                | Yes vs. No                                      | 1373/5673               | 9         | 2.51 (1.58 - 3.98)     | $9.94 \times 10^{-5}$  | 82             | 0.57 - 11.08  | 0.161                |
| Demographics                                                                | Sex                         | Female vs. Male                                 | 1384/5679               | 7         | 0.91 (0.69 - 1.20)     | $4.97 \times 10^{-1}$  | 50             | 0.45 - 1.85   | 0.168                |
| <i>Deep Venous Thrombosis</i>                                               |                             |                                                 |                         |           |                        |                        |                |               |                      |
| Comorbidities                                                               | Cancer                      | Yes vs. No                                      | 193/1038                | 7         | 1.16 (0.59 - 2.28)     | $6.76 \times 10^{-1}$  | 5              | 0.40 - 3.30   | 0.188                |
| Comorbidities                                                               | Diabetes mellitus           | Yes vs. No                                      | 202/532                 | 6         | 1.08 (0.64 - 1.83)     | $7.61 \times 10^{-1}$  | 0              | 0.52 - 2.28   | 0.656                |
| Comorbidities                                                               | Hypertension                | Yes vs. No                                      | 202/532                 | 6         | 0.98 (0.64 - 1.50)     | $9.38 \times 10^{-1}$  | 0              | 0.54 - 1.79   | 0.347                |
| Demographics                                                                | Sex                         | Female vs. Male                                 | 225/688                 | 7         | 0.86 (0.59 - 1.26)     | $4.31 \times 10^{-1}$  | 0              | 0.52 - 1.41   | 0.517                |
| <i>Hospitalization</i>                                                      |                             |                                                 |                         |           |                        |                        |                |               |                      |
| Comorbidities                                                               | Any comorbidity             | Yes vs. No                                      | 8851/17,459             | 22        | 4.13 (3.33 - 5.12)     | $2.46 \times 10^{-38}$ | 75             | 1.93 - 8.86   | 0.311                |
| Comorbidities                                                               | Asthma                      | Yes vs. No                                      | 10,189/19,312*          | 19        | 1.15 (0.96 - 1.37)     | $1.37 \times 10^{-1}$  | 52             | 0.66 - 2.00   | 0.689                |
| Comorbidities                                                               | BMI                         | >30 kg/m <sup>2</sup> vs. <30 kg/m <sup>2</sup> | 10,382/17,298           | 12        | 1.49 (1.20 - 1.84)     | $2.58 \times 10^{-4}$  | 82             | 0.75 - 2.96   | 0.485                |
| Comorbidities                                                               | Cancer                      | Yes vs. No                                      | 14,320/28,846*          | 21        | 2.42 (1.78 - 3.28)     | $1.63 \times 10^{-8}$  | 83             | 0.75 - 7.82   | 0.832                |
| Comorbidities                                                               | Cardiovascular disease      | Yes vs. No                                      | 6571/23,556**           | 19        | 3.40 (2.64 - 4.38)     | $2.39 \times 10^{-21}$ | 80             | 1.42 - 8.11   | 0.462                |
| Comorbidities                                                               | Cerebrovascular disease     | Yes vs. No                                      | 4464/7353               | 5         | 7.92 (3.18 - 19.70)    | $8.54 \times 10^{-6}$  | 74             | 0.40 - 156.32 | 0.550                |
| Comorbidities                                                               | Chronic kidney disease      | Yes vs. No                                      | 14,066/35,627           | 19        | 5.17 (3.81 - 7.03)     | $6.48 \times 10^{-26}$ | 80             | 1.68 - 15.94  | 0.675                |
| Comorbidities                                                               | Chronic lung disease        | Yes vs. No                                      | 2958/15,984*            | 18        | 1.98 (1.46 - 2.69)     | $1.29 \times 10^{-5}$  | 55             | 0.80 - 4.90   | 0.607                |
| Comorbidities                                                               | COPD                        | Yes vs. No                                      | 9018/17,335*            | 14        | 3.38 (2.31 - 4.94)     | $3.25 \times 10^{-10}$ | 70             | 0.96 - 11.95  | 0.344                |
| Comorbidities                                                               | Coronary heart disease      | Yes vs. No                                      | 10,082/18,493           | 13        | 3.47 (2.44 - 4.94)     | $4.86 \times 10^{-12}$ | 83             | 1.02 - 11.82  | 0.190                |
| Comorbidities                                                               | Diabetes mellitus           | Yes vs. No                                      | 14,927/39,014**         | 33        | 3.71 (3.17 - 4.34)     | $2.80 \times 10^{-60}$ | 72             | 1.94 - 7.09   | 0.774                |
| Comorbidities                                                               | Dyslipidemia                | Yes vs. No                                      | 2973/6886               | 6         | 2.43 (1.58 - 3.75)     | $5.84 \times 10^{-5}$  | 60             | 0.75 - 7.93   | 0.574                |
| Comorbidities                                                               | Heart failure               | Yes vs. No                                      | 9859/18,444*            | 14        | 6.74 (4.17 - 10.88)    | $6.34 \times 10^{-15}$ | 81             | 1.27 - 35.83  | 0.554                |
| Comorbidities                                                               | History of VTE              | Yes vs. No                                      | 4151/6931               | 5         | 2.35 (1.75 - 3.14)     | $1.25 \times 10^{-8}$  | 1              | 1.43 - 3.83   | 0.243                |
| Comorbidities                                                               | HIV infection               | Yes vs. No                                      | 6258/11,362             | 6         | 1.31 (0.98 - 1.75)     | $6.77 \times 10^{-2}$  | 0              | 0.87 - 1.97   | 0.781                |
| Comorbidities                                                               | Hypertension                | Yes vs. No                                      | 13,532/27,541**         | 30        | 3.70 (3.10 - 4.41)     | $4.17 \times 10^{-48}$ | 84             | 1.67 - 8.18   | 0.519                |
| Comorbidities                                                               | Immunocompromised state     | Yes vs. No                                      | 2308/4753               | 6         | 1.70 (0.95 - 3.04)     | $7.17 \times 10^{-2}$  | 45             | 0.37 - 7.81   | 0.201                |
| Comorbidities                                                               | Obesity                     | Yes vs. No                                      | 5938/19,788             | 10        | 2.10 (1.67 - 2.65)     | $3.16 \times 10^{-10}$ | 51             | 1.14 - 3.86   | 0.180                |
| Comorbidities                                                               | Obstructive sleep apnea     | Yes vs. No                                      | 2475/3819               | 5         | 2.11 (1.54 - 2.89)     | $3.14 \times 10^{-6}$  | 0              | 1.27 - 3.51   | 0.248                |
| Comorbidities                                                               | Rheumatological disease     | Yes vs. No                                      | 1569/2500               | 5         | 1.52 (0.97 - 2.39)     | $6.88 \times 10^{-2}$  | 0              | 0.73 - 3.17   | 0.019†               |
| Comorbidities                                                               | Solid organ transplantation | Yes vs. No                                      | 1644/2599               | 5         | 2.90 (0.98 - 8.58)     | $5.41 \times 10^{-2}$  | 38             | 0.15 - 56.74  | 0.531                |
| Demographics                                                                | Age                         | >60 vs. <60                                     | 6226/20,704             | 10        | 4.12 (3.02 - 5.61)     | $2.66 \times 10^{-19}$ | 90             | 1.57 - 10.81  | 0.656                |
| Demographics                                                                | Age                         | >65 vs. <65                                     | 6306/11,907             | 11        | 4.83 (3.03 - 7.70)     | $3.53 \times 10^{-11}$ | 94             | 0.84 - 27.87  | 0.329                |
| Demographics                                                                | Age                         | Per 1 year increase                             | 372/1360                | 5         | 1.057 (1.036 - 1.077)  | $2.77 \times 10^{-8}$  | 62             | 0.993 - 1.124 | 0.810                |

| Category of predictor | Predictor                        | Level of comparison       | N events/N participants | N studies | RE summary OR (95% CI) | P-value                | I <sup>2</sup> | 95% PI           | Egger's test P-value |
|-----------------------|----------------------------------|---------------------------|-------------------------|-----------|------------------------|------------------------|----------------|------------------|----------------------|
| Demographics          | Nursing home                     | Yes vs. No                | 2261/5607               | 5         | 6.25 (0.75 - 52.47)    | $9.11 \times 10^{-2}$  | 94             | 0.002 - 17536.89 | 0.231                |
| Demographics          | Sex                              | Female vs. Male           | 16,662/42,229***        | 44        | 0.61 (0.54 - 0.69)     | $6.68 \times 10^{-16}$ | 79             | 0.33 - 1.12      | 0.497                |
| Environmental factors | Smoking                          | Yes vs. No                | 10,954/29,237*          | 20        | 1.54 (1.23 - 1.94)     | $2.12 \times 10^{-4}$  | 78             | 0.68 - 3.51      | 0.354                |
| Imaging markers       | Bilateral involvement            | Yes vs. No                | 1249/1697               | 7         | 5.93 (3.01 - 11.70)    | $2.74 \times 10^{-7}$  | 57             | 0.97 - 36.44     | 0.872                |
| Imaging markers       | Ground-glass opacity             | Yes vs. No                | 144/234                 | 5         | 0.44 (0.19 - 1.01)     | $5.33 \times 10^{-2}$  | 0              | 0.11 - 1.70      | 0.468                |
| Medications           | ACEi                             | Yes vs. No                | 1286/3300               | 5         | 1.84 (1.25 - 2.71)     | $2.00 \times 10^{-3}$  | 48             | 0.60 - 5.60      | 0.570                |
| Medications           | ACEi/ARBs                        | Yes vs. No                | 5491/11,784             | 10        | 1.90 (1.50 - 2.41)     | $1.20 \times 10^{-7}$  | 75             | 0.93 - 3.90      | 0.286                |
| Medications           | Any immunosuppressive medication | Yes vs. No                | 1133/1847               | 5         | 2.23 (1.22 - 4.08)     | $9.08 \times 10^{-3}$  | 0              | 0.84 - 5.95      | 0.796                |
| Medications           | ARBs                             | Yes vs. No                | 1286/3300               | 5         | 1.49 (0.83 - 2.70)     | $1.83 \times 10^{-1}$  | 84             | 0.18 - 12.21     | 0.092                |
| Symptoms/signs        | Ageusia                          | Yes vs. No                | 2145/3729               | 10        | 0.40 (0.24 - 0.65)     | $2.25 \times 10^{-4}$  | 79             | 0.08 - 1.96      | 0.804                |
| Symptoms/signs        | Anorexia                         | Yes vs. No                | 1156/1686               | 5         | 1.68 (0.98 - 2.86)     | $5.69 \times 10^{-2}$  | 38             | 0.40 - 7.05      | 0.744                |
| Symptoms/signs        | Anosmia                          | Yes vs. No                | 2190/3818               | 11        | 0.35 (0.22 - 0.56)     | $9.58 \times 10^{-6}$  | 75             | 0.08 - 1.52      | 0.863                |
| Symptoms/signs        | Chest pain                       | Yes vs. No                | 286/845                 | 5         | 1.17 (0.83 - 1.64)     | $3.65 \times 10^{-1}$  | 0              | 0.67 - 2.03      | 0.554                |
| Symptoms/signs        | Cough                            | Yes vs. No                | 4847/17,617             | 20        | 1.26 (0.94 - 1.69)     | $1.16 \times 10^{-1}$  | 83             | 0.41 - 3.92      | 0.393                |
| Symptoms/signs        | Diarrhea                         | Yes vs. No                | 3933/16,149             | 17        | 1.33 (0.98 - 1.79)     | $6.57 \times 10^{-2}$  | 77             | 0.47 - 3.75      | 0.232                |
| Symptoms/signs        | Dyspnea                          | Yes vs. No                | 4840/17,566             | 19        | 3.47 (2.74 - 4.38)     | $1.69 \times 10^{-25}$ | 73             | 1.59 - 7.55      | 0.596                |
| Symptoms/signs        | Fatigue                          | Yes vs. No                | 1345/3157               | 9         | 1.37 (0.72 - 2.61)     | $3.41 \times 10^{-1}$  | 87             | 0.17 - 11.22     | 0.562                |
| Symptoms/signs        | Fever                            | Yes vs. No                | 4867/18,220             | 21        | 2.10 (1.53 - 2.88)     | $4.05 \times 10^{-6}$  | 86             | 0.58 - 7.55      | 0.087†               |
| Symptoms/signs        | GI symptoms                      | Yes vs. No                | 627/1882                | 8         | 1.77 (0.92 - 3.38)     | $8.51 \times 10^{-2}$  | 73             | 0.26 - 12.00     | 0.339                |
| Symptoms/signs        | Headache                         | Yes vs. No                | 2425/13,973             | 14        | 0.55 (0.37 - 0.80)     | $1.85 \times 10^{-3}$  | 80             | 0.15 - 1.95      | 0.013                |
| Symptoms/signs        | Myalgia                          | Yes vs. No                | 1042/2178               | 11        | 0.82 (0.49 - 1.35)     | $4.26 \times 10^{-1}$  | 77             | 0.17 - 3.99      | 0.396                |
| Symptoms/signs        | Nasal congestion                 | Yes vs. No                | 815/1673                | 7         | 0.48 (0.37 - 0.61)     | $6.58 \times 10^{-9}$  | 0              | 0.34 - 0.66      | 0.596                |
| Symptoms/signs        | Nausea                           | Yes vs. No                | 1524/2496               | 6         | 1.37 (0.99 - 1.90)     | $5.76 \times 10^{-2}$  | 37             | 0.62 - 3.06      | 0.280                |
| Symptoms/signs        | Pharyngalgia                     | Yes vs. No                | 2659/13,672             | 12        | 0.48 (0.32 - 0.71)     | $2.71 \times 10^{-4}$  | 74             | 0.14 - 1.60      | 0.272                |
| Symptoms/signs        | Rhinorrhea                       | Yes vs. No                | 2078/12,281             | 9         | 0.61 (0.37 - 0.99)     | $4.68 \times 10^{-2}$  | 54             | 0.19 - 2.00      | 0.013                |
| Symptoms/signs        | Vomiting                         | Yes vs. No                | 1443/2499               | 8         | 1.58 (1.15 - 2.19)     | $5.21 \times 10^{-3}$  | 9              | 0.93 - 2.71      | 0.025†               |
| <i>ICU admission</i>  |                                  |                           |                         |           |                        |                        |                |                  |                      |
| Biomarkers            | Creatinine                       | 133 μmol/L vs. 133 μmol/L | 280/886                 | 5         | 1.22 (0.34 - 4.34)     | $7.64 \times 10^{-1}$  | 74             | 0.02 - 93.63     | 0.707                |
| Biomarkers            | LDH                              | >250 U/L vs. <250 U/L     | 249/1048                | 6         | 8.64 (3.17 - 23.55)    | $2.46 \times 10^{-5}$  | 66             | 0.43 - 173.03    | 0.262                |
| Biomarkers            | Lymphocytes                      | <1.000 /μL vs. >1.000 /μL | 314/1241                | 8         | 4.41 (2.12 - 9.17)     | $6.89 \times 10^{-5}$  | 73             | 0.47 - 41.51     | 0.005†               |
| Biomarkers            | Procalcitonin                    | >0.5 ng/ml vs. <0.5 ng/ml | 405/1237                | 6         | 3.15 (1.68 - 5.92)     | $3.59 \times 10^{-4}$  | 64             | 0.50 - 19.81     | 0.700                |
| Biomarkers            | WBC                              | <4.000 /μL vs. >4.000 /μL | 195/429                 | 6         | 0.73 (0.36 - 1.48)     | $3.79 \times 10^{-1}$  | 0              | 0.27 - 1.98      | 0.366                |
| Comorbidities         | Any comorbidity                  | Yes vs. No                | 1703/6867               | 16        | 2.07 (1.45 - 2.96)     | $6.41 \times 10^{-5}$  | 74             | 0.56 - 7.64      | 0.429                |
| Comorbidities         | Asthma                           | Yes vs. No                | 708/2567                | 10        | 1.08 (0.80 - 1.47)     | $6.05 \times 10^{-1}$  | 4              | 0.71 - 1.65      | 0.947                |

| Category of predictor | Predictor                                        | Level of comparison                                | N events/N participants | N studies | RE summary OR (95% CI) | P-value                | I <sup>2</sup> | 95% PI        | Egger's test P-value |
|-----------------------|--------------------------------------------------|----------------------------------------------------|-------------------------|-----------|------------------------|------------------------|----------------|---------------|----------------------|
| Comorbidities         | Autoimmune diseases/<br>Rheumatological diseases | Yes vs. No                                         | 1214/4538               | 5         | 1.47 (0.74 - 2.93)     | $2.75 \times 10^{-1}$  | 53             | 0.19 - 11.67  | 0.719                |
| Comorbidities         | BMI                                              | >30 kg/m <sup>2</sup> vs.<br><30 kg/m <sup>2</sup> | 1289/4707               | 11        | 1.93 (1.42 - 2.63)     | $3.04 \times 10^{-5}$  | 67             | 0.74 - 5.06   | 0.090†               |
| Comorbidities         | Cancer                                           | Yes vs. No                                         | 2714/11,770             | 31        | 1.06 (0.80 - 1.42)     | $6.70 \times 10^{-1}$  | 50             | 0.37 - 3.05   | 0.025                |
| Comorbidities         | Cardiovascular disease                           | Yes vs. No                                         | 1504/5712               | 22        | 1.61 (1.23 - 2.11)     | $5.04 \times 10^{-4}$  | 41             | 0.77 - 3.36   | 0.571                |
| Comorbidities         | Cerebrovascular disease                          | Yes vs. No                                         | 952/4836                | 10        | 1.01 (0.62 - 1.64)     | $9.78 \times 10^{-1}$  | 58             | 0.27 - 3.79   | 0.185                |
| Comorbidities         | Chronic kidney disease                           | Yes vs. No                                         | 1718/7738               | 19        | 1.56 (1.20 - 2.04)     | $9.22 \times 10^{-4}$  | 32             | 0.82 - 3.00   | 0.506                |
| Comorbidities         | Chronic liver disease                            | Yes vs. No                                         | 302/1633                | 11        | 1.87 (1.09 - 3.22)     | $2.34 \times 10^{-2}$  | 0              | 1.00 - 3.50   | 0.189                |
| Comorbidities         | Chronic lung disease                             | Yes vs. No                                         | 1312/5209               | 14        | 1.48 (1.18 - 1.86)     | $7.92 \times 10^{-4}$  | 10             | 1.00 - 2.20   | 0.482                |
| Comorbidities         | Cirrhosis                                        | Yes vs. No                                         | 496/1648                | 5         | 1.15 (0.59 - 2.22)     | $6.82 \times 10^{-1}$  | 0              | 0.39 - 3.34   | 0.551                |
| Comorbidities         | COPD                                             | Yes vs. No                                         | 1131/5463               | 17        | 1.41 (1.01 - 1.97)     | $4.48 \times 10^{-2}$  | 32             | 0.60 - 3.31   | 0.311                |
| Comorbidities         | Coronary heart disease                           | Yes vs. No                                         | 1151/5779               | 14        | 1.42 (0.98 - 2.04)     | $6.37 \times 10^{-2}$  | 59             | 0.46 - 4.33   | 0.611                |
| Comorbidities         | Diabetes mellitus                                | Yes vs. No                                         | 2916/14,508             | 41        | 1.56 (1.32 - 1.85)     | $2.56 \times 10^{-7}$  | 47             | 0.82 - 2.98   | 0.372                |
| Comorbidities         | Dyslipidemia                                     | Yes vs. No                                         | 490/2386                | 8         | 0.87 (0.55 - 1.36)     | $5.37 \times 10^{-1}$  | 53             | 0.26 - 2.88   | 0.380                |
| Comorbidities         | Heart failure                                    | Yes vs. No                                         | 1076/4900               | 10        | 1.27 (0.88 - 1.85)     | $2.03 \times 10^{-1}$  | 53             | 0.46 - 3.55   | 0.322                |
| Comorbidities         | HIV infection                                    | Yes vs. No                                         | 378/1684                | 5         | 1.27 (0.64 - 2.52)     | $4.88 \times 10^{-1}$  | 0              | 0.42 - 3.86   | 0.455                |
| Comorbidities         | Hypertension                                     | Yes vs. No                                         | 2895/14,803             | 41        | 1.73 (1.41 - 2.12)     | $1.58 \times 10^{-7}$  | 71             | 0.65 - 4.63   | 0.040†               |
| Comorbidities         | Obesity                                          | Yes vs. No                                         | 935/5348                | 11        | 1.61 (0.90 - 2.87)     | $1.08 \times 10^{-1}$  | 76             | 0.27 - 9.73   | 0.011                |
| Comorbidities         | Obstructive sleep apnea                          | Yes vs. No                                         | 511/2236                | 5         | 1.62 (1.16 - 2.26)     | $4.63 \times 10^{-3}$  | 0              | 0.94 - 2.79   | 0.562                |
| Comorbidities         | Solid organ transplantation                      | Yes vs. No                                         | 516/1670                | 5         | 1.14 (0.63 - 2.05)     | $6.69 \times 10^{-1}$  | 0              | 0.44 - 2.95   | 0.971                |
| Demographics          | Age                                              | >60 vs. <60                                        | 470/3099                | 9         | 1.95 (1.25 - 3.06)     | $3.43 \times 10^{-3}$  | 69             | 0.50 - 7.55   | 0.120                |
| Demographics          | Age                                              | >65 vs. <65                                        | 1870/9500               | 13        | 1.33 (0.91 - 1.94)     | $1.43 \times 10^{-1}$  | 88             | 0.34 - 5.12   | 0.897                |
| Demographics          | Age                                              | Per 1 year<br>increase                             | 780/2769*               | 6         | 1.005 (0.99 - 1.02)    | $5.00 \times 10^{-1}$  | 80             | 0.957 - 1.055 | 0.117                |
| Demographics          | Sex                                              | Female vs. Male                                    | 3209/18,789*            | 49        | 0.53 (0.46 - 0.59)     | $1.43 \times 10^{-24}$ | 31             | 0.34 - 0.82   | 0.497                |
| Environmental factors | Smoking                                          | Yes vs. No                                         | 1624/7286*              | 18        | 1.19 (1.03 - 1.39)     | $2.30 \times 10^{-2}$  | 3              | 0.97 - 1.48   | 0.320                |
| Imaging markers       | Bilateral involvement                            | Yes vs. No                                         | 426/1362                | 9         | 2.73 (1.51 - 4.94)     | $9.13 \times 10^{-4}$  | 52             | 0.60 - 12.41  | 0.590                |
| Medications           | ACEi                                             | Yes vs. No                                         | 1199/5402               | 8         | 1.01 (0.81 - 1.27)     | $9.05 \times 10^{-1}$  | 21             | 0.64 - 1.60   | 0.534                |
| Medications           | ACEi/ARBs                                        | Yes vs. No                                         | 1819/9880               | 12        | 1.20 (0.83 - 1.74)     | $3.28 \times 10^{-1}$  | 85             | 0.35 - 4.13   | 0.296                |
| Medications           | ARBs                                             | Yes vs. No                                         | 1138/5014               | 7         | 1.08 (0.82 - 1.42)     | $5.80 \times 10^{-1}$  | 36             | 0.57 - 2.05   | 0.320                |
| Medications           | Statins                                          | Yes vs. No                                         | 353/1072                | 5         | 1.17 (0.88 - 1.55)     | $2.77 \times 10^{-1}$  | 0              | 0.74 - 1.84   | 0.160                |
| Symptoms/signs        | Chest pain                                       | Yes vs. No                                         | 278/1556                | 6         | 1.14 (0.64 - 2.05)     | $6.51 \times 10^{-1}$  | 35             | 0.28 - 4.65   | 0.620                |
| Symptoms/signs        | Cough                                            | Yes vs. No                                         | 840/2902                | 23        | 0.95 (0.78 - 1.15)     | $5.95 \times 10^{-1}$  | 0              | 0.77 - 1.16   | 0.568                |
| Symptoms/signs        | Diarrhea                                         | Yes vs. No                                         | 727/2549                | 17        | 0.97 (0.78 - 1.21)     | $7.85 \times 10^{-1}$  | 0              | 0.76 - 1.23   | 0.657                |
| Symptoms/signs        | Dyspnea                                          | Yes vs. No                                         | 989/3287                | 24        | 4.31 (2.77 - 6.71)     | $9.31 \times 10^{-11}$ | 77             | 0.67 - 27.79  | 0.006†               |
| Symptoms/signs        | Expectoration                                    | Yes vs. No                                         | 446/1680                | 10        | 0.76 (0.53 - 1.09)     | $1.34 \times 10^{-1}$  | 9              | 0.43 - 1.35   | 0.821                |
| Symptoms/signs        | Fatigue                                          | Yes vs. No                                         | 222/993                 | 8         | 1.07 (0.65 - 1.76)     | $7.92 \times 10^{-1}$  | 49             | 0.27 - 4.16   | 0.890                |
| Symptoms/signs        | Fever                                            | Yes vs. No                                         | 1051/4102               | 26        | 1.09 (0.89 - 1.34)     | $4.06 \times 10^{-1}$  | 4              | 0.80 - 1.49   | 0.262                |
| Symptoms/signs        | GI symptoms                                      | Yes vs. No                                         | 313/2402                | 8         | 1.11 (0.73 - 1.68)     | $6.32 \times 10^{-1}$  | 40             | 0.40 - 3.07   | 0.903                |

| Category of predictor                  | Predictor                   | Level of comparison                             | N events/N participants | N studies | RE summary OR (95% CI) | P-value                | I <sup>2</sup> | 95% PI       | Egger's test P-value |
|----------------------------------------|-----------------------------|-------------------------------------------------|-------------------------|-----------|------------------------|------------------------|----------------|--------------|----------------------|
| Symptoms/signs                         | Headache                    | Yes vs. No                                      | 829/2867                | 19        | 0.62 (0.47 - 0.82)     | $7.09 \times 10^{-4}$  | 0              | 0.46 - 0.84  | 0.730                |
| Symptoms/signs                         | Myalgia                     | Yes vs. No                                      | 493/1773                | 11        | 0.93 (0.63 - 1.37)     | $7.03 \times 10^{-1}$  | 39             | 0.35 - 2.46  | 0.267                |
| Symptoms/signs                         | Nausea/Vomiting             | Yes vs. No                                      | 371/1581                | 7         | 0.62 (0.30 - 1.27)     | $1.91 \times 10^{-1}$  | 41             | 0.11 - 3.59  | 0.288                |
| Symptoms/signs                         | Pharyngalgia                | Yes vs. No                                      | 456/1929                | 11        | 1.26 (0.82 - 1.95)     | $2.92 \times 10^{-1}$  | 27             | 0.48 - 3.30  | 0.306                |
| <i>Invasive Mechanical Ventilation</i> |                             |                                                 |                         |           |                        |                        |                |              |                      |
| Comorbidities                          | Any comorbidity             | Yes vs. No                                      | 1838/9474               | 7         | 1.17 (0.81 - 1.68)     | $3.99 \times 10^{-1}$  | 73             | 0.43 - 3.19  | 0.054                |
| Comorbidities                          | Asthma                      | Yes vs. No                                      | 1077/5131               | 9         | 1.04 (0.84 - 1.30)     | $6.96 \times 10^{-1}$  | 0              | 0.80 - 1.36  | 0.380                |
| Comorbidities                          | BMI                         | >30 kg/m <sup>2</sup> vs. <30 kg/m <sup>2</sup> | 1220/5058               | 10        | 1.54 (1.23 - 1.93)     | $1.66 \times 10^{-4}$  | 45             | 0.87 - 2.74  | 0.661                |
| Comorbidities                          | Cancer                      | Yes vs. No                                      | 1210/10,362             | 12        | 1.57 (1.25 - 1.98)     | $1.02 \times 10^{-4}$  | 0              | 1.21 - 2.04  | 0.043                |
| Comorbidities                          | Cardiovascular disease      | Yes vs. No                                      | 1424/8466               | 8         | 1.16 (0.64 - 2.10)     | $6.17 \times 10^{-1}$  | 87             | 0.17 - 7.77  | 0.039                |
| Comorbidities                          | Cerebrovascular disease     | Yes vs. No                                      | 866/5729                | 7         | 1.39 (0.79 - 2.47)     | $2.54 \times 10^{-1}$  | 64             | 0.26 - 7.39  | 0.462                |
| Comorbidities                          | Chronic kidney disease      | Yes vs. No                                      | 2148/11,766             | 10        | 1.36 (0.91 - 2.04)     | $1.38 \times 10^{-1}$  | 80             | 0.37 - 4.98  | 0.258                |
| Comorbidities                          | Chronic lung disease        | Yes vs. No                                      | 1586/8382               | 9         | 1.17 (0.68 - 2.00)     | $5.72 \times 10^{-1}$  | 83             | 0.20 - 6.66  | 0.003                |
| Comorbidities                          | COPD                        | Yes vs. No                                      | 906/4418                | 9         | 1.58 (0.92 - 2.69)     | $9.59 \times 10^{-2}$  | 67             | 0.32 - 7.73  | 0.954                |
| Comorbidities                          | Coronary heart disease      | Yes vs. No                                      | 969/10,641              | 8         | 1.81 (1.37 - 2.40)     | $3.68 \times 10^{-5}$  | 24             | 1.00 - 3.27  | 0.247                |
| Comorbidities                          | Diabetes mellitus           | Yes vs. No                                      | 3248/24,541             | 26        | 1.64 (1.33 - 2.02)     | $3.65 \times 10^{-6}$  | 75             | 0.68 - 3.92  | 0.266                |
| Comorbidities                          | Heart failure               | Yes vs. No                                      | 1036/10,213             | 8         | 1.41 (0.89 - 2.22)     | $1.41 \times 10^{-1}$  | 64             | 0.38 - 5.26  | 0.011                |
| Comorbidities                          | HIV infection               | Yes vs. No                                      | 1302/7359               | 6         | 1.44 (0.77 - 2.68)     | $2.54 \times 10^{-1}$  | 0              | 0.59 - 3.47  | 0.866                |
| Comorbidities                          | Hypertension                | Yes vs. No                                      | 1992/14,928             | 21        | 1.70 (1.39 - 2.08)     | $2.25 \times 10^{-7}$  | 61             | 0.83 - 3.48  | 0.230                |
| Comorbidities                          | Solid organ transplantation | Yes vs. No                                      | 261/828                 | 5         | 1.32 (0.73 - 2.40)     | $3.63 \times 10^{-1}$  | 0              | 0.50 - 3.48  | 0.953                |
| Demographics                           | Age                         | >60 vs. <60                                     | 877/4220                | 5         | 1.66 (1.33 - 2.07)     | $9.28 \times 10^{-6}$  | 32             | 0.92 - 2.97  | 0.368                |
| Demographics                           | Age                         | >65 vs. <65                                     | 1277/14,042             | 10        | 1.74 (1.14 - 2.66)     | $9.68 \times 10^{-3}$  | 85             | 0.46 - 6.67  | 0.826                |
| Demographics                           | Sex                         | Female vs. Male                                 | 2711/13,404             | 24        | 0.62 (0.55 - 0.71)     | $2.46 \times 10^{-12}$ | 21             | 0.46 - 0.85  | 0.720                |
| Environmental factors                  | Smoking                     | Yes vs. No                                      | 1105/5471               | 10        | 1.15 (0.94 - 1.40)     | $1.75 \times 10^{-1}$  | 18             | 0.78 - 1.68  | 0.677                |
| Medications                            | ACEi                        | Yes vs. No                                      | 361/2614                | 5         | 1.28 (0.91 - 1.82)     | $1.57 \times 10^{-1}$  | 0              | 0.73 - 2.25  | 0.006                |
| Medications                            | ACEi/ARBs                   | Yes vs. No                                      | 536/4116                | 10        | 1.18 (0.81 - 1.73)     | $3.92 \times 10^{-1}$  | 56             | 0.40 - 3.49  | 0.372                |
| Medications                            | ARBs                        | Yes vs. No                                      | 361/2614                | 5         | 1.46 (1.04 - 2.06)     | $2.87 \times 10^{-2}$  | 12             | 0.71 - 3.03  | 0.852                |
| Symptoms/signs                         | Fever                       | Yes vs. No                                      | 438/1391                | 6         | 0.95 (0.69 - 1.29)     | $7.26 \times 10^{-1}$  | 25             | 0.47 - 1.90  | 0.937                |
| <i>Mortality</i>                       |                             |                                                 |                         |           |                        |                        |                |              |                      |
| Biomarkers                             | ALT                         | >40 U/L vs. <40 U/L                             | 1155/5829               | 6         | 1.47 (1.12 - 1.93)     | $5.07 \times 10^{-3}$  | 49             | 0.72 - 3.02  | 0.088†               |
| Biomarkers                             | AST                         | >40 U/L vs. <40 U/L                             | 1182/5950               | 7         | 2.42 (1.70 - 3.44)     | $8.19 \times 10^{-7}$  | 72             | 0.86 - 6.82  | 0.570                |
| Biomarkers                             | CRP                         | >10 mg/L vs. <10 mg/L                           | 508/3914                | 7         | 7.09 (3.14 - 16.00)    | $2.37 \times 10^{-6}$  | 63             | 0.72 - 69.46 | 0.752                |
| Biomarkers                             | D-dimers                    | >0.5 µg/mL vs. <0.5 µg/mL                       | 591/3936                | 9         | 3.47 (2.25 - 5.36)     | $1.98 \times 10^{-8}$  | 63             | 1.02 - 11.78 | 0.015†               |
| Biomarkers                             | LDH                         | >250 U/L vs. <250 U/L                           | 523/4185                | 10        | 3.72 (1.74 - 7.93)     | $6.80 \times 10^{-4}$  | 83             | 0.28 - 49.38 | 0.244                |

| Category of predictor | Predictor                | Level of comparison                             | N events/N participants | N studies | RE summary OR (95% CI) | P-value                  | I <sup>2</sup> | 95% PI        | Egger's test P-value |
|-----------------------|--------------------------|-------------------------------------------------|-------------------------|-----------|------------------------|--------------------------|----------------|---------------|----------------------|
| Biomarkers            | Lymphocytes              | <1.000 /μL vs. >1.000 /μL                       | 367/1733                | 5         | 3.18 (1.33 - 7.58)     | 9.22 × 10 <sup>-3</sup>  | 87             | 0.14 - 72.75  | 0.587                |
| Biomarkers            | Neutrophils              | >6.300 /μL vs. <6.300 /μL                       | 317/1906                | 5         | 5.66 (3.42 - 9.37)     | 1.50 × 10 <sup>-11</sup> | 72             | 1.00 - 31.96  | 0.312                |
| Biomarkers            | Platelets                | <150.000 /μL vs. >150.000 /μL                   | 226/2017                | 8         | 2.31 (1.39 - 3.84)     | 1.26 × 10 <sup>-3</sup>  | 55             | 0.57 - 9.32   | 0.233                |
| Biomarkers            | Procalcitonin            | >0.5 ng/ml vs. <0.5 ng/ml                       | 815/3848                | 7         | 5.36 (2.67 - 10.74)    | 2.27 × 10 <sup>-6</sup>  | 69             | 0.69 - 41.81  | 0.799                |
| Biomarkers            | WBC                      | <4.000 /μL vs. >4.000 /μL                       | 1011/4780               | 6         | 0.60 (0.43 - 0.84)     | 2.65 × 10 <sup>-3</sup>  | 20             | 0.29 - 1.21   | 0.532                |
| Biomarkers            | WBC                      | >10.000 /μL vs. <10.000 /μL                     | 500/4309                | 7         | 6.35 (2.58 - 15.61)    | 5.77 × 10 <sup>-5</sup>  | 90             | 0.31 - 128.62 | 0.509                |
| Comorbidities         | Any comorbidity          | Yes vs. No                                      | 14,625/62,464           | 31        | 3.54 (2.84 - 4.41)     | 1.64 × 10 <sup>-29</sup> | 87             | 1.44 - 8.70   | 0.006†               |
| Comorbidities         | Any neurological disease | Yes vs. No                                      | 8569/23,631             | 7         | 3.68 (2.28 - 5.96)     | 1.12 × 10 <sup>-7</sup>  | 92             | 0.79 - 17.08  | 0.145                |
| Comorbidities         | Asthma                   | Yes vs. No                                      | 17,046/70,521           | 28        | 0.90 (0.76 - 1.07)     | 2.41 × 10 <sup>-1</sup>  | 53             | 0.51 - 1.58   | 0.657                |
| Comorbidities         | Atrial fibrillation      | Yes vs. No                                      | 869/3633                | 9         | 2.20 (1.43 - 3.37)     | 3.03 × 10 <sup>-4</sup>  | 40             | 0.78 - 6.24   | 0.680                |
| Comorbidities         | BMI                      | >30 kg/m <sup>2</sup> vs. <30 kg/m <sup>2</sup> | 2619/13,340             | 25        | 0.96 (0.80 - 1.13)     | 6.00 × 10 <sup>-1</sup>  | 52             | 0.53 - 1.72   | 0.320                |
| Comorbidities         | BMI                      | Per 1 kg/m <sup>2</sup> increase                | 585/3362                | 9         | 0.991 (0.972 - 1.009)  | 3.27 × 10 <sup>-1</sup>  | 31             | 0.95 - 1.033  | 0.867                |
| Comorbidities         | Cancer                   | Yes vs. No                                      | 16,701/96,849           | 36        | 2.14 (1.86 - 2.45)     | 1.69 × 10 <sup>-27</sup> | 50             | 1.30 - 3.52   | 0.262                |
| Comorbidities         | Cardiovascular disease   | Yes vs. No                                      | 14,794/77,260           | 27        | 3.10 (2.38 - 4.04)     | 6.75 × 10 <sup>-17</sup> | 94             | 0.95 - 10.15  | 0.244                |
| Comorbidities         | Cerebrovascular disease  | Yes vs. No                                      | 2533/17,662             | 31        | 2.89 (2.26 - 3.69)     | 1.90 × 10 <sup>-17</sup> | 55             | 1.10 - 7.58   | 0.167                |
| Comorbidities         | Chronic kidney disease   | Yes vs. No                                      | 18,219/90,951           | 51        | 3.01 (2.52 - 3.60)     | 9.39 × 10 <sup>-34</sup> | 80             | 1.14 - 7.98   | 0.107                |
| Comorbidities         | Chronic liver disease    | Yes vs. No                                      | 17,476/61,046           | 18        | 1.46 (1.24 - 1.72)     | 5.95 × 10 <sup>-6</sup>  | 4              | 1.15 - 1.84   | 0.399                |
| Comorbidities         | Chronic lung disease     | Yes vs. No                                      | 6534/41,381             | 15        | 2.35 (1.85 - 3.00)     | 4.36 × 10 <sup>-12</sup> | 71             | 1.10 - 5.02   | 0.315                |
| Comorbidities         | Cirrhosis                | Yes vs. No                                      | 567/4448                | 6         | 1.41 (0.83 - 2.39)     | 2.06 × 10 <sup>-1</sup>  | 0              | 0.66 - 2.98   | 0.262                |
| Comorbidities         | COPD                     | Yes vs. No                                      | 12,531/65,667           | 44        | 2.19 (1.88 - 2.55)     | 8.08 × 10 <sup>-24</sup> | 43             | 1.20 - 4.00   | 0.277                |
| Comorbidities         | Coronary heart disease   | Yes vs. No                                      | 5068/35,417             | 42        | 2.84 (2.44 - 3.29)     | 8.44 × 10 <sup>-43</sup> | 54             | 1.48 - 5.44   | 0.327                |
| Comorbidities         | Dementia                 | Yes vs. No                                      | 6419/21,208             | 11        | 3.12 (2.50 - 3.90)     | 1.62 × 10 <sup>-23</sup> | 46             | 1.86 - 5.23   | 0.619                |
| Comorbidities         | Diabetes mellitus        | Yes vs. No                                      | 17,994/116,666          | 53        | 2.15 (1.84 - 2.52)     | 1.87 × 10 <sup>-21</sup> | 89             | 0.82 - 5.67   | 0.057†               |
| Comorbidities         | Dyslipidemia             | Yes vs. No                                      | 4899/19,680             | 19        | 1.34 (1.05 - 1.70)     | 1.70 × 10 <sup>-2</sup>  | 72             | 0.60 - 2.97   | 0.083                |
| Comorbidities         | Heart failure            | Yes vs. No                                      | 4287/39,794             | 32        | 3.74 (2.80 - 5.01)     | 6.57 × 10 <sup>-19</sup> | 84             | 0.86 - 16.36  | 0.998                |
| Comorbidities         | Hematological malignancy | Yes vs. No                                      | 6471/24,427             | 6         | 2.11 (1.63 - 2.72)     | 9.34 × 10 <sup>-9</sup>  | 33             | 1.16 - 3.85   | 0.021†               |
| Comorbidities         | History of VTE           | Yes vs. No                                      | 972/4252                | 7         | 1.52 (1.06 - 2.19)     | 2.43 × 10 <sup>-2</sup>  | 13             | 0.78 - 2.96   | 0.102                |
| Comorbidities         | HIV infection            | Yes vs. No                                      | 6921/25,340             | 9         | 0.81 (0.52 - 1.25)     | 3.45 × 10 <sup>-1</sup>  | 15             | 0.37 - 1.80   | 0.241                |
| Comorbidities         | Hypertension             | Yes vs. No                                      | 9169/73,066*            | 68        | 2.22 (1.95 - 2.53)     | 2.66 × 10 <sup>-32</sup> | 77             | 0.96 - 5.11   | 0.132                |
| Comorbidities         | Immunocompromised state  | Yes vs. No                                      | 4187/11,789             | 12        | 2.05 (1.37 - 3.05)     | 4.51 × 10 <sup>-4</sup>  | 58             | 0.66 - 6.35   | 0.810                |
| Comorbidities         | Obesity                  | Yes vs. No                                      | 6735/25,894             | 15        | 1.27 (0.94 - 1.71)     | 1.13 × 10 <sup>-1</sup>  | 76             | 0.51 - 3.17   | 0.426                |
| Comorbidities         | Obstructive sleep apnea  | Yes vs. No                                      | 568/3827                | 7         | 1.41 (1.08 - 1.85)     | 1.11 × 10 <sup>-2</sup>  | 0              | 1.00 - 2.01   | 0.713                |

| Category of predictor | Predictor                        | Level of comparison | N events/N participants | N studies | RE summary OR (95% CI) | P-value                | I <sup>2</sup> | 95% PI        | Egger's test P-value |
|-----------------------|----------------------------------|---------------------|-------------------------|-----------|------------------------|------------------------|----------------|---------------|----------------------|
| Comorbidities         | Peripheral arterial disease      | Yes vs. No          | 2312/17,433             | 6         | 2.07 (1.55 - 2.75)     | $6.08 \times 10^{-7}$  | 32             | 1.05 - 4.06   | 0.466                |
| Comorbidities         | Rheumatological disease          | Yes vs. No          | 5722/19,740             | 6         | 1.41 (1.27 - 1.57)     | $4.64 \times 10^{-10}$ | 0              | 1.21 - 1.64   | 0.755                |
| Comorbidities         | Tuberculosis                     | Yes vs. No          | 903/5268                | 5         | 1.88 (0.70 - 5.07)     | $2.12 \times 10^{-1}$  | 0              | 0.38 - 9.40   | 0.525                |
| Demographics          | Age                              | >60 vs. <60         | 9803/96,805             | 24        | 9.23 (7.20 - 11.83)    | $8.75 \times 10^{-69}$ | 87             | 3.19 - 26.67  | 0.392                |
| Demographics          | Age                              | >65 vs. <65         | 5752/31,564             | 22        | 5.52 (3.94 - 7.75)     | $4.69 \times 10^{-23}$ | 92             | 1.34 - 22.76  | 0.739                |
| Demographics          | Age                              | Per 1 year increase | 2236/13,397             | 33        | 1.072 (1.063 - 1.081)  | $1.17 \times 10^{-57}$ | 74             | 1.029 - 1.116 | 0.290                |
| Demographics          | Nursing home                     | Yes vs. No          | 1123/6665               | 11        | 2.41 (1.25 - 4.64)     | $8.78 \times 10^{-3}$  | 88             | 0.23 - 24.92  | 0.022†               |
| Demographics          | Sex                              | Female vs. Male     | 24,317/190,180          | 71        | 0.71 (0.65 - 0.78)     | $3.37 \times 10^{-14}$ | 74             | 0.46 - 1.12   | 0.704                |
| Environmental factors | Alcohol drinking                 | Yes vs. No          | 993/6321                | 6         | 0.99 (0.72 - 1.34)     | $9.27 \times 10^{-1}$  | 0              | 0.64 - 1.53   | 0.497                |
| Environmental factors | Smoking                          | Yes vs. No          | 7831/30,250             | 39        | 1.50 (1.35 - 1.66)     | $1.41 \times 10^{-14}$ | 20             | 1.15 - 1.95   | 0.155                |
| Imaging markers       | Bilateral involvement            | Yes vs. No          | 1195/6784               | 25        | 1.39 (1.02 - 1.89)     | $3.70 \times 10^{-2}$  | 55             | 0.48 - 4.04   | 0.004†               |
| Imaging markers       | Consolidation                    | Yes vs. No          | 477/3169                | 9         | 1.52 (1.05 - 2.22)     | $2.79 \times 10^{-2}$  | 45             | 0.59 - 3.94   | 0.440                |
| Imaging markers       | Ground-glass opacity             | Yes vs. No          | 729/4958                | 12        | 0.96 (0.65 - 1.43)     | $8.56 \times 10^{-1}$  | 58             | 0.32 - 2.90   | 0.042                |
| Imaging markers       | Pleural effusion                 | Yes vs. No          | 210/660                 | 7         | 1.61 (0.80 - 3.24)     | $1.80 \times 10^{-1}$  | 25             | 0.36 - 7.29   | 0.548                |
| Medications           | ACEi                             | Yes vs. No          | 3146/13,393             | 12        | 1.38 (1.20 - 1.59)     | $7.03 \times 10^{-6}$  | 31             | 1.01 - 1.89   | 0.020                |
| Medications           | ACEi/ARBs                        | Yes vs. No          | 3375/23,303             | 28        | 1.31 (1.02 - 1.67)     | $3.16 \times 10^{-2}$  | 83             | 0.45 - 3.83   | 0.063                |
| Medications           | Anticoagulant therapy            | Yes vs. No          | 1825/4837               | 10        | 1.14 (0.87 - 1.49)     | $3.39 \times 10^{-1}$  | 30             | 0.65 - 2.00   | 0.228                |
| Medications           | Antiplatelet therapy             | Yes vs. No          | 1010/2127               | 5         | 1.21 (0.75 - 1.95)     | $4.45 \times 10^{-1}$  | 53             | 0.29 - 5.06   | 0.017                |
| Medications           | Any immunosuppressive medication | Yes vs. No          | 6903/20,436             | 5         | 1.22 (1.12 - 1.34)     | $7.99 \times 10^{-6}$  | 0              | 1.06 - 1.41   | 0.107                |
| Medications           | ARBs                             | Yes vs. No          | 3146/13,393             | 12        | 1.33 (1.14 - 1.55)     | $2.25 \times 10^{-4}$  | 43             | 0.92 - 1.92   | 0.101                |
| Medications           | Beta-blockers                    | Yes vs. No          | 2690/10,327             | 8         | 1.98 (1.53 - 2.57)     | $2.64 \times 10^{-7}$  | 78             | 0.94 - 4.18   | 0.622                |
| Medications           | Calcium channel blockers         | Yes vs. No          | 1150/7198               | 7         | 1.27 (0.80 - 2.02)     | $3.10 \times 10^{-1}$  | 71             | 0.33 - 4.89   | 0.200                |
| Medications           | Chemotherapy                     | Yes vs. No          | 1052/3124               | 5         | 1.12 (0.61 - 2.06)     | $7.11 \times 10^{-1}$  | 55             | 0.19 - 6.58   | 0.479                |
| Medications           | Insulin                          | Yes vs. No          | 1013/6195               | 5         | 2.39 (1.54 - 3.71)     | $9.92 \times 10^{-5}$  | 45             | 0.71 - 8.06   | 0.719                |
| Medications           | Oral corticosteroids             | Yes vs. No          | 898/2563                | 5         | 1.00 (0.49 - 2.04)     | $9.92 \times 10^{-1}$  | 32             | 0.15 - 6.56   | 0.016                |
| Medications           | Statins                          | Yes vs. No          | 1842/5553               | 6         | 1.56 (1.27 - 1.90)     | $1.75 \times 10^{-5}$  | 55             | 0.92 - 2.62   | 0.144                |
| Symptoms/signs        | Abdominal pain                   | Yes vs. No          | 219/2157                | 8         | 1.04 (0.53 - 2.05)     | $9.00 \times 10^{-1}$  | 0              | 0.45 - 2.42   | 0.387                |
| Symptoms/signs        | Altered mental status            | Yes vs. No          | 6727/33,241             | 10        | 4.38 (2.53 - 7.58)     | $1.23 \times 10^{-7}$  | 87             | 0.78 - 24.54  | 0.545                |
| Symptoms/signs        | Anorexia                         | Yes vs. No          | 692/5095                | 12        | 1.54 (0.92 - 2.58)     | $9.83 \times 10^{-2}$  | 67             | 0.32 - 7.44   | 0.407                |
| Symptoms/signs        | Anosmia/Ageusia                  | Yes vs. No          | 293/2116                | 5         | 0.42 (0.23 - 0.77)     | $5.41 \times 10^{-3}$  | 0              | 0.15 - 1.13   | 0.618                |
| Symptoms/signs        | Arthralgia/Myalgia               | Yes vs. No          | 906/3753                | 6         | 0.56 (0.46 - 0.70)     | $8.43 \times 10^{-8}$  | 0              | 0.42 - 0.76   | 0.272                |
| Symptoms/signs        | Chest pain                       | Yes vs. No          | 580/6353                | 14        | 1.07 (0.70 - 1.62)     | $7.65 \times 10^{-1}$  | 31             | 0.38 - 2.98   | 0.394                |
| Symptoms/signs        | Chills                           | Yes vs. No          | 1093/4858               | 7         | 0.85 (0.51 - 1.42)     | $5.39 \times 10^{-1}$  | 63             | 0.23 - 3.11   | 0.681                |
| Symptoms/signs        | Cough                            | Yes vs. No          | 8825/44,947             | 33        | 0.82 (0.71 - 0.95)     | $7.40 \times 10^{-3}$  | 57             | 0.50 - 1.35   | 0.211                |
| Symptoms/signs        | Diarrhea                         | Yes vs. No          | 2696/12,241             | 23        | 0.71 (0.55 - 0.92)     | $1.00 \times 10^{-2}$  | 49             | 0.33 - 1.54   | 0.323                |
| Symptoms/signs        | Dizziness                        | Yes vs. No          | 240/3019                | 9         | 1.57 (0.99 - 2.49)     | $5.66 \times 10^{-2}$  | 0              | 0.90 - 2.73   | 0.752                |
| Symptoms/signs        | Dyspnea                          | Yes vs. No          | 8780/44,683             | 31        | 2.70 (2.16 - 3.39)     | $6.83 \times 10^{-18}$ | 86             | 0.99 - 7.41   | 0.027†               |
| Symptoms/signs        | Expectoration                    | Yes vs. No          | 2038/11,156             | 19        | 1.25 (1.03 - 1.53)     | $2.58 \times 10^{-2}$  | 33             | 0.77 - 2.05   | 0.894                |

| Category of predictor         | Predictor              | Level of comparison   | N events/N participants | N studies | RE summary OR (95% CI) | P-value                | I <sup>2</sup> | 95% PI       | Egger's test P-value |
|-------------------------------|------------------------|-----------------------|-------------------------|-----------|------------------------|------------------------|----------------|--------------|----------------------|
| Symptoms/signs                | Fatigue                | Yes vs. No            | 2169/13,648             | 22        | 1.03 (0.81 - 1.32)     | $7.86 \times 10^{-1}$  | 64             | 0.45 - 2.36  | 0.490                |
| Symptoms/signs                | Fever                  | Yes vs. No            | 9444/73,576             | 28        | 0.92 (0.75 - 1.13)     | $4.25 \times 10^{-1}$  | 83             | 0.40 - 2.12  | 0.269                |
| Symptoms/signs                | GI symptoms            | Yes vs. No            | 1661/34,470             | 14        | 1.02 (0.76 - 1.36)     | $9.09 \times 10^{-1}$  | 70             | 0.38 - 2.74  | 0.339                |
| Symptoms/signs                | Headache               | Yes vs. No            | 2685/13,997             | 23        | 0.56 (0.39 - 0.81)     | $1.91 \times 10^{-3}$  | 64             | 0.16 - 1.96  | 0.238                |
| Symptoms/signs                | Heart rate             | >100 bpm vs. <100 bpm | 214/666                 | 5         | 1.81 (1.24 - 2.65)     | $2.28 \times 10^{-3}$  | 0              | 0.97 - 3.36  | 0.067                |
| Symptoms/signs                | Hemoptysis             | Yes vs. No            | 1079/3413               | 8         | 1.00 (0.62 - 1.62)     | $9.95 \times 10^{-1}$  | 0              | 0.55 - 1.82  | 0.932                |
| Symptoms/signs                | Myalgia                | Yes vs. No            | 7126/38,321             | 17        | 0.62 (0.45 - 0.86)     | $3.61 \times 10^{-3}$  | 78             | 0.21 - 1.84  | 0.198                |
| Symptoms/signs                | Nausea                 | Yes vs. No            | 491/3364                | 8         | 0.99 (0.57 - 1.74)     | $9.78 \times 10^{-1}$  | 43             | 0.24 - 4.13  | 0.760                |
| Symptoms/signs                | Nausea/Vomiting        | Yes vs. No            | 1800/8849               | 10        | 0.80 (0.60 - 1.08)     | $1.46 \times 10^{-1}$  | 38             | 0.41 - 1.60  | 0.048                |
| Symptoms/signs                | Pharyngalgia           | Yes vs. No            | 2003/8666               | 18        | 0.58 (0.46 - 0.71)     | $5.04 \times 10^{-7}$  | 0              | 0.46 - 0.73  | 0.316                |
| Symptoms/signs                | Respiratory rate       | >24 bpm vs. <24 bpm   | 1211/5496               | 6         | 4.50 (2.38 - 8.54)     | $4.02 \times 10^{-6}$  | 87             | 0.59 - 34.10 | 0.931                |
| Symptoms/signs                | Rhinorrhea             | Yes vs. No            | 913/4933                | 6         | 0.63 (0.38 - 1.04)     | $7.16 \times 10^{-2}$  | 15             | 0.22 - 1.79  | 0.077                |
| Symptoms/signs                | SpO2                   | <90 % vs. >90 %       | 1267/6448               | 7         | 4.37 (2.98 - 6.42)     | $5.08 \times 10^{-14}$ | 70             | 1.43 - 13.4  | 0.861                |
| Symptoms/signs                | Vomiting               | Yes vs. No            | 438/3225                | 8         | 1.19 (0.72 - 1.96)     | $4.89 \times 10^{-1}$  | 2              | 0.61 - 2.33  | 0.649                |
| <i>Pulmonary Embolism</i>     |                        |                       |                         |           |                        |                        |                |              |                      |
| Comorbidities                 | Cancer                 | Yes vs. No            | 299/2291                | 6         | 0.95 (0.41 - 2.19)     | $9.03 \times 10^{-1}$  | 58             | 0.09 - 10.14 | 0.517                |
| Comorbidities                 | COPD                   | Yes vs. No            | 253/1745                | 5         | 0.99 (0.59 - 1.66)     | $9.72 \times 10^{-1}$  | 0              | 0.43 - 2.28  | 0.739                |
| Comorbidities                 | Diabetes mellitus      | Yes vs. No            | 253/1740                | 5         | 0.86 (0.62 - 1.19)     | $3.68 \times 10^{-1}$  | 0              | 0.51 - 1.46  | 0.984                |
| Comorbidities                 | Hypertension           | Yes vs. No            | 253/1735                | 5         | 0.87 (0.66 - 1.15)     | $3.36 \times 10^{-1}$  | 0              | 0.55 - 1.38  | 0.754                |
| Demographics                  | Sex                    | Female vs. Male       | 305/1965                | 6         | 0.71 (0.54 - 0.93)     | $1.30 \times 10^{-2}$  | 0              | 0.48 - 1.04  | 0.113                |
| <i>Venous Thromboembolism</i> |                        |                       |                         |           |                        |                        |                |              |                      |
| Comorbidities                 | Cancer                 | Yes vs. No            | 144/644                 | 7         | 1.63 (0.76 - 3.50)     | $2.10 \times 10^{-1}$  | 0              | 0.60 - 4.44  | 0.321                |
| Comorbidities                 | Chronic kidney disease | Yes vs. No            | 142/653                 | 6         | 0.61 (0.30 - 1.24)     | $1.73 \times 10^{-1}$  | 0              | 0.22 - 1.68  | 0.231                |
| Comorbidities                 | Diabetes mellitus      | Yes vs. No            | 158/724                 | 7         | 0.87 (0.54 - 1.40)     | $5.65 \times 10^{-1}$  | 14             | 0.36 - 2.12  | 0.169                |
| Comorbidities                 | Hypertension           | Yes vs. No            | 113/570                 | 5         | 0.75 (0.39 - 1.42)     | $3.74 \times 10^{-1}$  | 44             | 0.12 - 4.69  | 0.499                |
| Demographics                  | Sex                    | Female vs. Male       | 214/951                 | 9         | 0.71 (0.51 - 0.99)     | $4.22 \times 10^{-2}$  | 0              | 0.47 - 1.06  | 0.167                |
| Environmental factors         | Smoking                | Yes vs. No            | 127/595                 | 5         | 0.69 (0.34 - 1.43)     | $3.23 \times 10^{-1}$  | 11             | 0.16 - 3.03  | 0.955                |

\* One study did not report the number of cases and/or total number of participants.

\*\* Two studies did not report the number of cases and/or total number of participants.

\*\*\* Three studies did not report the number of cases and/or total number of participants.

† The annotated meta-analyses fulfilled the criteria for the presence of small-study effects (a statistically significant Egger's test at P-value <0.10 and a more conservative effect in the largest study than in the random-effects meta-analysis).

**Abbreviations:** ACEi = angiotensin-converting enzyme inhibitors, ALT = alanine aminotransferase, ARBs = angiotensin II receptor blockers, AST = aspartate aminotransferase, BMI = body mass index, bpm = breaths per minute (for respiratory rate) or beats per minute (for heart rate), CI = confidence interval, COPD = chronic obstructive pulmonary disease, CRP = C-reactive protein, GI = gastrointestinal, HIV = human immunodeficiency virus, LDH = lactate dehydrogenase, OR = odds ratio, PI = prediction interval, RE = random-effects, SpO<sub>2</sub> = blood oxygen saturation, VTE = venous thromboembolism, WBC = white blood cells

**Supplementary Table S3.** Results of the sensitivity analysis excluding the studies that reported hazard ratios.

| Predictors                                                                  | Level of comparison                   | N events/N participants | N studies | RE summary OR (95% CI) | P-value                | I <sup>2</sup> | 95% PI        |
|-----------------------------------------------------------------------------|---------------------------------------|-------------------------|-----------|------------------------|------------------------|----------------|---------------|
| <i>Acute Kidney Injury</i>                                                  |                                       |                         |           |                        |                        |                |               |
| ACEi/ARBs                                                                   | Yes vs. No                            | 4548/11,816             | 9         | 1.29 (1.07 - 1.56)     | $7.40 \times 10^{-3}$  | 43             | 0.83 - 2.01   |
| Hypertension                                                                | Yes vs. No                            | 2842/9658               | 8         | 2.02 (1.54 - 2.65)     | $4.52 \times 10^{-7}$  | 63             | 1.01 - 4.04   |
| <i>Acute Respiratory Distress Syndrome</i>                                  |                                       |                         |           |                        |                        |                |               |
| ACEi/ARBs                                                                   | Yes vs. No                            | 252/887                 | 7         | 0.88 (0.63 - 1.22)     | $4.42 \times 10^{-1}$  | 0              | 0.57 - 1.36   |
| Hypertension                                                                | Yes vs. No                            | 494/2550                | 8         | 1.83 (1.11 - 3.01)     | $1.76 \times 10^{-2}$  | 69             | 0.42 - 7.91   |
| <i>Composite Outcome 1 (ICU admission or Death)</i>                         |                                       |                         |           |                        |                        |                |               |
| Age                                                                         | Per 1 year increase                   | 508/1424                | 4         | 1.013 (0.996 - 1.031)  | $1.29 \times 10^{-1}$  | 68             | 0.947 - 1.085 |
| Any comorbidity                                                             | Yes vs. No                            | 330/838                 | 6         | 1.35 (0.95 - 1.92)     | $9.54 \times 10^{-2}$  | 0              | 0.82 - 2.22   |
| Cancer                                                                      | Yes vs. No                            | 1028/3890               | 12        | 1.53 (1.00 - 2.35)     | $4.97 \times 10^{-2}$  | 56             | 0.45 - 5.28   |
| Chronic kidney disease                                                      | Yes vs. No                            | 1096/4197               | 12        | 1.78 (1.24 - 2.55)     | $1.76 \times 10^{-3}$  | 45             | 0.68 - 4.65   |
| COPD                                                                        | Yes vs. No                            | 662/2995                | 7         | 2.18 (1.31 - 3.63)     | $2.79 \times 10^{-3}$  | 51             | 0.56 - 8.42   |
| Coronary heart disease                                                      | Yes vs. No                            | 350/1037                | 4         | 2.54 (1.15 - 5.61)     | $2.17 \times 10^{-2}$  | 76             | 0.08 - 80.52  |
| Cough                                                                       | Yes vs. No                            | 379/1091                | 6         | 0.89 (0.58 - 1.36)     | $5.86 \times 10^{-1}$  | 49             | 0.28 - 2.82   |
| Diabetes mellitus                                                           | Yes vs. No                            | 1257/4671               | 14        | 1.92 (1.45 - 2.55)     | $6.68 \times 10^{-6}$  | 60             | 0.80 - 4.63   |
| Fever                                                                       | Yes vs. No                            | 720/2142                | 8         | 1.26 (0.81 - 1.97)     | $3.09 \times 10^{-1}$  | 54             | 0.38 - 4.16   |
| Hypertension                                                                | Yes vs. No                            | 1003/4074               | 12        | 1.69 (1.10 - 2.60)     | $1.63 \times 10^{-2}$  | 82             | 0.38 - 7.60   |
| Sex                                                                         | Female vs. Male                       | 1423/5354               | 17        | 0.70 (0.59 - 0.83)     | $5.32 \times 10^{-5}$  | 27             | 0.46 - 1.07   |
| <i>Composite Outcome 2 (ICU admission, Mechanical Ventilation or Death)</i> |                                       |                         |           |                        |                        |                |               |
| Any comorbidity                                                             | Yes vs. No                            | 1084/4282               | 5         | 3.11 (1.58 - 6.14)     | $1.08 \times 10^{-3}$  | 75             | 0.32 - 30.01  |
| <i>Hospitalization</i>                                                      |                                       |                         |           |                        |                        |                |               |
| Age                                                                         | Per 1 year increase                   | 258/854                 | 4         | 1.059 (1.029 - 1.09)   | $8.37 \times 10^{-5}$  | 69             | 0.939 - 1.194 |
| <i>ICU admission</i>                                                        |                                       |                         |           |                        |                        |                |               |
| Age                                                                         | >60 vs. <60                           | 440/2882                | 8         | 1.96 (1.18 - 3.26)     | $9.54 \times 10^{-3}$  | 73             | 0.42 - 9.09   |
| Age                                                                         | >65 vs. <65                           | 1815/9039               | 12        | 1.19 (0.81 - 1.74)     | $3.80 \times 10^{-1}$  | 87             | 0.32 - 4.35   |
| Any comorbidity                                                             | Yes vs. No                            | 1673/6650               | 15        | 2.02 (1.39 - 2.94)     | $2.48 \times 10^{-4}$  | 75             | 0.52 - 7.79   |
| GI symptoms                                                                 | Yes vs. No                            | 283/2185                | 7         | 0.95 (0.69 - 1.30)     | $7.28 \times 10^{-1}$  | 3              | 0.59 - 1.51   |
| Lymphocytes                                                                 | <1,000 / $\mu$ L vs. >1,000 / $\mu$ L | 284/1024                | 7         | 4.52 (1.90 - 10.74)    | $6.26 \times 10^{-4}$  | 73             | 0.31 - 64.97  |
| Sex                                                                         | Female vs. Male                       | 3179/18,572             | 48        | 0.53 (0.46 - 0.60)     | $1.84 \times 10^{-23}$ | 32             | 0.33 - 0.83   |
| <i>Invasive Mechanical Ventilation</i>                                      |                                       |                         |           |                        |                        |                |               |
| Age                                                                         | >65 vs. <65                           | 1226/13,035             | 9         | 1.50 (0.99 - 2.26)     | $5.54 \times 10^{-2}$  | 82             | 0.43 - 5.22   |
| Cerebrovascular disease                                                     | Yes vs. No                            | 815/4722                | 6         | 1.23 (0.68 - 2.22)     | $4.99 \times 10^{-1}$  | 62             | 0.22 - 6.94   |
| Chronic kidney disease                                                      | Yes vs. No                            | 2097/10,759             | 9         | 1.30 (0.86 - 1.99)     | $2.17 \times 10^{-1}$  | 82             | 0.33 - 5.08   |
| Coronary heart disease                                                      | Yes vs. No                            | 918/9634                | 7         | 1.79 (1.46 - 2.20)     | $2.08 \times 10^{-8}$  | 0              | 1.37 - 2.34   |

| Predictors                       | Level of comparison       | N events/N participants | N studies | RE summary OR (95% CI) | P-value                | I <sup>2</sup> | 95% PI        |
|----------------------------------|---------------------------|-------------------------|-----------|------------------------|------------------------|----------------|---------------|
| Diabetes mellitus                | Yes vs. No                | 3197/23,534             | 25        | 1.62 (1.30 - 2.00)     | $1.18 \times 10^{-5}$  | 75             | 0.67 - 3.91   |
| Sex                              | Female vs. Male           | 2660/12,397             | 23        | 0.64 (0.57 - 0.73)     | $3.12 \times 10^{-12}$ | 14             | 0.50 - 0.83   |
| Smoking                          | Yes vs. No                | 1054/4464               | 9         | 1.13 (0.96 - 1.32)     | $1.38 \times 10^{-1}$  | 0              | 0.93 - 1.36   |
| <i>Mortality</i>                 |                           |                         |           |                        |                        |                |               |
| ACEi                             | Yes vs. No                | 2310/11,678             | 11        | 1.31 (1.11 - 1.55)     | $1.42 \times 10^{-3}$  | 18             | 0.95 - 1.80   |
| ACEi/ARBs                        | Yes vs. No                | 3136/21,468             | 26        | 1.36 (1.05 - 1.75)     | $1.90 \times 10^{-2}$  | 83             | 0.46 - 3.97   |
| Age                              | >60 vs. <60               | 9783/96,415             | 23        | 8.96 (6.97 - 11.51)    | $7.95 \times 10^{-66}$ | 88             | 3.11 - 25.80  |
| Age                              | >65 vs. <65               | 5639/30,863             | 21        | 5.85 (4.13 - 8.28)     | $3.00 \times 10^{-23}$ | 92             | 1.42 - 24.06  |
| Age                              | per 1 year increase       | 1453/8793               | 23        | 1.078 (1.065 - 1.092)  | $4.20 \times 10^{-32}$ | 77             | 1.022 - 1.137 |
| Anticoagulant therapy            | Yes vs. No                | 948/2938                | 8         | 1.02 (0.61 - 1.69)     | $9.53 \times 10^{-1}$  | 39             | 0.30 - 3.44   |
| Antiplatelet therapy             | Yes vs. No                | 174/412                 | 4         | 0.99 (0.61 - 1.60)     | $9.76 \times 10^{-1}$  | 0              | 0.35 - 2.85   |
| Any immunosuppressive medication | Yes vs. No                | 6067/18,721             | 4         | 1.24 (1.12 - 1.39)     | $6.60 \times 10^{-5}$  | 0              | 0.98 - 1.58   |
| ARBs                             | Yes vs. No                | 2310/11,678             | 11        | 1.25 (1.01 - 1.55)     | $3.61 \times 10^{-2}$  | 48             | 0.73 - 2.14   |
| AST                              | >40 U/L vs. <40 U/L       | 1167/5818               | 6         | 2.63 (1.86 - 3.73)     | $5.60 \times 10^{-8}$  | 72             | 0.92 - 7.56   |
| Asthma                           | Yes vs. No                | 17,000/70,367           | 27        | 0.88 (0.74 - 1.05)     | $1.46 \times 10^{-1}$  | 52             | 0.51 - 1.52   |
| Beta-blockers                    | Yes vs. No                | 1854/8612               | 7         | 2.13 (1.63 - 2.78)     | $3.49 \times 10^{-8}$  | 59             | 1.05 - 4.31   |
| BMI                              | Per 1 unit increase       | 480/2891                | 7         | 0.997 (0.972 - 1.023)  | $8.25 \times 10^{-1}$  | 42             | 0.938 - 1.06  |
| Cerebrovascular disease          | Yes vs. No                | 2465/17,330             | 30        | 2.92 (2.25 - 3.78)     | $4.86 \times 10^{-16}$ | 57             | 1.06 - 8.06   |
| Chronic kidney disease           | Yes vs. No                | 18,097/90,588           | 49        | 3.06 (2.54 - 3.67)     | $5.91 \times 10^{-33}$ | 80             | 1.15 - 8.13   |
| Coronary heart disease           | Yes vs. No                | 5050/35,363             | 41        | 2.84 (2.44 - 3.31)     | $1.25 \times 10^{-41}$ | 55             | 1.47 - 5.50   |
| D-dimers                         | >0.5 µg/mL vs. <0.5 µg/mL | 488/3329                | 8         | 3.76 (2.18 - 6.48)     | $1.89 \times 10^{-6}$  | 66             | 0.79 - 17.8   |
| Diabetes mellitus                | Yes vs. No                | 17,948/116,512          | 52        | 2.16 (1.84 - 2.54)     | $2.85 \times 10^{-21}$ | 90             | 0.82 - 5.72   |
| Heart failure                    | Yes vs. No                | 4241/39,640             | 31        | 3.82 (2.83 - 5.15)     | $1.67 \times 10^{-18}$ | 85             | 0.86 - 17.03  |
| Hypertension                     | Yes vs. No                | 8983/68,775             | 65        | 2.24 (1.95 - 2.57)     | $7.21 \times 10^{-30}$ | 78             | 0.95 - 5.28   |
| LDH                              | >250 U/L vs. <250 U/L     | 508/4053                | 9         | 3.81 (1.68 - 8.62)     | $1.37 \times 10^{-3}$  | 85             | 0.24 - 60.13  |
| Neutrophils                      | >6.300 /µL vs. <6.300 /µL | 241/1697                | 4         | 6.79 (4.31 - 10.7)     | $1.39 \times 10^{-16}$ | 51             | 1.21 - 38.13  |
| Obstructive sleep apnea          | Yes vs. No                | 522/3673                | 6         | 1.42 (1.05 - 1.91)     | $2.19 \times 10^{-2}$  | 0              | 0.93 - 2.16   |
| Peripheral arterial disease      | Yes vs. No                | 2244/17,101             | 5         | 2.06 (1.46 - 2.91)     | $4.26 \times 10^{-5}$  | 44             | 0.79 - 5.38   |
| Sex                              | Female vs. Male           | 18,946/175,565          | 67        | 0.70 (0.64 - 0.77)     | $7.96 \times 10^{-14}$ | 70             | 0.44 - 1.12   |
| Smoking                          | Yes vs. No                | 7673/29,370             | 37        | 1.50 (1.34 - 1.67)     | $7.66 \times 10^{-13}$ | 23             | 1.12 - 2.00   |
| Statins                          | Yes vs. No                | 1006/3838               | 5         | 1.35 (0.93 - 1.96)     | $1.13 \times 10^{-1}$  | 58             | 0.45 - 4.06   |

**Supplementary Table S4.** Results of the sensitivity analysis excluding the studies with less than 100 COVID-19 participants.

| Predictors                                                                   | Level of comparison                             | N events/N participants | N studies | RE summary OR (95% CI) | P-value                | I <sup>2</sup> | 95% PI        |
|------------------------------------------------------------------------------|-------------------------------------------------|-------------------------|-----------|------------------------|------------------------|----------------|---------------|
| <i>Acute Kidney Injury</i>                                                   |                                                 |                         |           |                        |                        |                |               |
| ACEi/ARBs                                                                    | Yes vs. No                                      | 4438/12774              | 7         | 1.27 (1.06 - 1.53)     | $1.08 \times 10^{-2}$  | 51             | 0.79 - 2.06   |
| Cancer                                                                       | Yes vs. No                                      | 4025/10813              | 4         | 1.50 (1.03 - 2.20)     | $3.63 \times 10^{-2}$  | 50             | 0.36 - 6.27   |
| Diabetes mellitus                                                            | Yes vs. No                                      | 4828/20711              | 9         | 1.99 (1.59 - 2.49)     | $2.16 \times 10^{-9}$  | 79             | 1.01 - 3.94   |
| Heart failure                                                                | Yes vs. No                                      | 4036/9177               | 4         | 2.27 (1.45 - 3.56)     | $3.61 \times 10^{-4}$  | 64             | 0.40 - 12.80  |
| Hypertension                                                                 | Yes vs. No                                      | 2732/12918              | 6         | 2.41 (1.78 - 3.25)     | $9.98 \times 10^{-9}$  | 78             | 0.96 - 6.02   |
| Sex                                                                          | Female vs. Male                                 | 4036/9177               | 4         | 0.74 (0.63 - 0.87)     | $2.80 \times 10^{-4}$  | 49             | 0.42 - 1.31   |
| <i>Acute Respiratory Distress Syndrome</i>                                   |                                                 |                         |           |                        |                        |                |               |
| ACEi/ARBs                                                                    | Yes vs. No                                      | 163/1740                | 4         | 0.80 (0.61 - 1.05)     | $1.05 \times 10^{-1}$  | 0              | 0.44 - 1.45   |
| Diabetes mellitus                                                            | Yes vs. No                                      | 793/8070                | 4         | 2.34 (1.55 - 3.54)     | $5.76 \times 10^{-5}$  | 59             | 0.46 - 11.85  |
| Hypertension                                                                 | Yes vs. No                                      | 330/5684                | 4         | 3.00 (2.27 - 3.97)     | $1.56 \times 10^{-14}$ | 58             | 1.00 - 9.00   |
| <i>Composite Outcome 1 (ICU admission or Death)</i>                          |                                                 |                         |           |                        |                        |                |               |
| ACEi/ARBs                                                                    | Yes vs. No                                      | 1541/7551               | 4         | 2.03 (1.02 - 4.02)     | $4.26 \times 10^{-2}$  | 96             | 0.08 - 54.00  |
| Age                                                                          | Per 1 year increase                             | 543/1564                | 4         | 1.015 (1.002 - 1.029)  | $2.33 \times 10^{-2}$  | 68             | 0.961 - 1.072 |
| Any comorbidity                                                              | Yes vs. No                                      | 334/919                 | 5         | 1.48 (1.07 - 2.05)     | $1.79 \times 10^{-2}$  | 0              | 0.87 - 2.52   |
| BMI                                                                          | >30 kg/m <sup>2</sup> vs. <30 kg/m <sup>2</sup> | 484/1403                | 4         | 1.15 (0.91 - 1.45)     | $2.53 \times 10^{-1}$  | 0              | 0.68 - 1.92   |
| Cancer                                                                       | Yes vs. No                                      | 1033/3920               | 10        | 1.47 (0.98 - 2.20)     | $6.35 \times 10^{-2}$  | 56             | 0.46 - 4.64   |
| Cardiovascular disease                                                       | Yes vs. No                                      | 709/3019                | 6         | 1.83 (1.04 - 3.20)     | $3.62 \times 10^{-2}$  | 83             | 0.29 - 11.42  |
| Chronic kidney disease                                                       | Yes vs. No                                      | 1093/4178               | 9         | 1.81 (1.25 - 2.60)     | $1.57 \times 10^{-3}$  | 51             | 0.67 - 4.88   |
| COPD                                                                         | Yes vs. No                                      | 682/3069                | 6         | 1.86 (1.18 - 2.93)     | $7.91 \times 10^{-3}$  | 54             | 0.51 - 6.75   |
| Coronary heart disease                                                       | Yes vs. No                                      | 385/1177                | 4         | 2.79 (1.53 - 5.09)     | $8.20 \times 10^{-4}$  | 70             | 0.22 - 34.76  |
| Cough                                                                        | Yes vs. No                                      | 386/1145                | 4         | 0.80 (0.62 - 1.03)     | $8.62 \times 10^{-2}$  | 0              | 0.45 - 1.40   |
| Diabetes mellitus                                                            | Yes vs. No                                      | 1254/4649               | 11        | 1.90 (1.40 - 2.57)     | $3.59 \times 10^{-5}$  | 69             | 0.72 - 5.03   |
| Dyspnea                                                                      | Yes vs. No                                      | 412/1195                | 4         | 2.01 (1.54 - 2.62)     | $2.08 \times 10^{-7}$  | 0              | 1.13 - 3.58   |
| Fever                                                                        | Yes vs. No                                      | 692/2097                | 5         | 1.17 (0.75 - 1.82)     | $4.92 \times 10^{-1}$  | 61             | 0.30 - 4.57   |
| Heart failure                                                                | Yes vs. No                                      | 305/767                 | 4         | 0.87 (0.49 - 1.52)     | $6.22 \times 10^{-1}$  | 11             | 0.19 - 3.91   |
| Hypertension                                                                 | Yes vs. No                                      | 1000/4052               | 9         | 1.80 (1.15 - 2.83)     | $1.05 \times 10^{-2}$  | 86             | 0.38 - 8.59   |
| Sex                                                                          | Female vs. Male                                 | 1354/5174               | 12        | 0.69 (0.60 - 0.79)     | $7.36 \times 10^{-8}$  | 0              | 0.59 - 0.80   |
| <i>Composite Outcome 2 (ICU admission, Mechanical Ventilation, or Death)</i> |                                                 |                         |           |                        |                        |                |               |
| Any comorbidity                                                              | Yes vs. No                                      | 1072/4601               | 6         | 2.78 (1.62 - 4.74)     | $1.91 \times 10^{-4}$  | 71             | 0.53 - 14.43  |
| Diabetes mellitus                                                            | Yes vs. No                                      | 1383/5536               | 7         | 1.94 (1.03 - 3.67)     | $4.13 \times 10^{-2}$  | 90             | 0.22 - 16.90  |
| Hypertension                                                                 | Yes vs. No                                      | 1334/5551               | 7         | 2.50 (1.49 - 4.19)     | $5.43 \times 10^{-4}$  | 86             | 0.46 - 13.65  |
| Sex                                                                          | Female vs. Male                                 | 1345/5557               | 5         | 0.91 (0.66 - 1.26)     | $5.68 \times 10^{-1}$  | 66             | 0.32 - 2.58   |
| <i>Deep Venous Thrombosis</i>                                                |                                                 |                         |           |                        |                        |                |               |
| Cancer                                                                       | Yes vs. No                                      | 116/832                 | 4         | 0.96 (0.44 - 2.11)     | $9.24 \times 10^{-1}$  | 0              | 0.17 - 5.40   |
| <i>Hospitalization</i>                                                       |                                                 |                         |           |                        |                        |                |               |
| ACEi/ARBs                                                                    | Yes vs. No                                      | 5455/11726              | 9         | 1.90 (1.49 - 2.43)     | $3.20 \times 10^{-7}$  | 78             | 0.89 - 4.05   |

| Predictors                  | Level of comparison                             | N events/N participants | N studies | RE summary OR (95% CI) | P-value                | I <sup>2</sup> | 95% PI        |
|-----------------------------|-------------------------------------------------|-------------------------|-----------|------------------------|------------------------|----------------|---------------|
| Age                         | >60 vs. <60                                     | 6204/20616              | 8         | 4.00 (2.91 - 5.49)     | $1.00 \times 10^{-17}$ | 92             | 1.43 - 11.14  |
| Age                         | >65 vs. <65                                     | 6256/11845              | 10        | 4.98 (3.08 - 8.06)     | $5.85 \times 10^{-11}$ | 95             | 0.82 - 30.12  |
| Age                         | Per 1 year increase                             | 358/1319                | 4         | 1.056 (1.033 - 1.080)  | $1.22 \times 10^{-6}$  | 71             | 0.961 - 1.161 |
| Ageusia                     | Yes vs. No                                      | 2085/3555               | 7         | 0.35 (0.20 - 0.61)     | $2.10 \times 10^{-4}$  | 85             | 0.05 - 2.29   |
| Anosmia                     | Yes vs. No                                      | 2086/3563               | 7         | 0.29 (0.17 - 0.47)     | $9.73 \times 10^{-7}$  | 82             | 0.05 - 1.49   |
| Any comorbidity             | Yes vs. No                                      | 8651/16922              | 13        | 4.27 (3.40 - 5.37)     | $8.48 \times 10^{-36}$ | 82             | 1.96 - 9.34   |
| Asthma                      | Yes vs. No                                      | 10076/18988             | 14        | 1.09 (0.90 - 1.31)     | $3.89 \times 10^{-1}$  | 56             | 0.62 - 1.91   |
| BMI                         | >30 kg/m <sup>2</sup> vs. <30 kg/m <sup>2</sup> | 10340/17207             | 11        | 1.43 (1.16 - 1.77)     | $8.10 \times 10^{-4}$  | 83             | 0.73 - 2.82   |
| Cancer                      | Yes vs. No                                      | 14175/28548             | 16        | 2.49 (1.78 - 3.48)     | $1.05 \times 10^{-7}$  | 87             | 0.72 - 8.62   |
| Cardiovascular disease      | Yes vs. No                                      | 6522/23458              | 16        | 3.29 (2.50 - 4.33)     | $1.27 \times 10^{-17}$ | 82             | 1.32 - 8.18   |
| Chronic kidney disease      | Yes vs. No                                      | 14050/35587             | 18        | 5.24 (3.85 - 7.14)     | $6.55 \times 10^{-26}$ | 81             | 1.68 - 16.31  |
| Chronic lung disease        | Yes vs. No                                      | 2829/15650              | 12        | 2.00 (1.41 - 2.83)     | $9.04 \times 10^{-5}$  | 66             | 0.72 - 5.54   |
| COPD                        | Yes vs. No                                      | 8961/17241              | 12        | 3.61 (2.50 - 5.21)     | $6.38 \times 10^{-12}$ | 64             | 1.19 - 10.97  |
| Coronary heart disease      | Yes vs. No                                      | 10002/18347             | 11        | 3.64 (2.51 - 5.30)     | $1.18 \times 10^{-11}$ | 85             | 1.01 - 13.1   |
| Cough                       | Yes vs. No                                      | 4638/17110              | 12        | 1.25 (0.89 - 1.76)     | $1.95 \times 10^{-1}$  | 89             | 0.37 - 4.25   |
| Diabetes mellitus           | Yes vs. No                                      | 14735/38591             | 26        | 3.72 (3.15 - 4.40)     | $2.65 \times 10^{-53}$ | 77             | 1.89 - 7.33   |
| Diarrhea                    | Yes vs. No                                      | 3769/15733              | 10        | 1.38 (1.00 - 1.91)     | $5.34 \times 10^{-2}$  | 85             | 0.44 - 4.30   |
| Dyslipidemia                | Yes vs. No                                      | 2913/6728               | 4         | 2.71 (1.66 - 4.44)     | $7.25 \times 10^{-5}$  | 68             | 0.39 - 18.94  |
| Dyspnea                     | Yes vs. No                                      | 4638/17110              | 12        | 3.53 (2.83 - 4.40)     | $4.07 \times 10^{-29}$ | 76             | 1.71 - 7.28   |
| Fatigue                     | Yes vs. No                                      | 1277/2946               | 5         | 1.46 (0.64 - 3.32)     | $3.71 \times 10^{-1}$  | 93             | 0.06 - 33.34  |
| Fever                       | Yes vs. No                                      | 4657/17707              | 13        | 2.11 (1.48 - 3.00)     | $3.26 \times 10^{-5}$  | 89             | 0.57 - 7.85   |
| GI symptoms                 | Yes vs. No                                      | 506/1613                | 4         | 1.67 (0.70 - 3.98)     | $2.45 \times 10^{-1}$  | 87             | 0.03 - 82.42  |
| Headache                    | Yes vs. No                                      | 2286/13599              | 8         | 0.40 (0.28 - 0.58)     | $1.17 \times 10^{-6}$  | 81             | 0.13 - 1.30   |
| Heart failure               | Yes vs. No                                      | 9779/18298              | 11        | 6.11 (3.61 - 10.35)    | $1.74 \times 10^{-11}$ | 84             | 1.04 - 35.89  |
| Hypertension                | Yes vs. No                                      | 13340/27118             | 23        | 3.77 (3.13 - 4.56)     | $2.23 \times 10^{-43}$ | 88             | 1.65 - 8.61   |
| Immunocompromised state     | Yes vs. No                                      | 2300/4696               | 5         | 1.70 (0.91 - 3.18)     | $9.43 \times 10^{-2}$  | 55             | 0.25 - 11.74  |
| Myalgia                     | Yes vs. No                                      | 843/1794                | 5         | 0.64 (0.35 - 1.14)     | $1.29 \times 10^{-1}$  | 86             | 0.07 - 5.58   |
| Nasal congestion            | Yes vs. No                                      | 804/1590                | 5         | 0.48 (0.37 - 0.62)     | $9.65 \times 10^{-9}$  | 0              | 0.32 - 0.72   |
| Nausea                      | Yes vs. No                                      | 1497/2380               | 4         | 1.32 (0.92 - 1.91)     | $1.37 \times 10^{-1}$  | 55             | 0.32 - 5.53   |
| Pharyngalgia                | Yes vs. No                                      | 2561/13385              | 7         | 0.45 (0.28 - 0.71)     | $5.99 \times 10^{-4}$  | 84             | 0.10 - 2.01   |
| Rhinorrhea                  | Yes vs. No                                      | 1967/11996              | 4         | 0.47 (0.25 - 0.85)     | $1.29 \times 10^{-2}$  | 68             | 0.05 - 4.55   |
| Sex                         | Female vs. Male                                 | 16435/41698             | 32        | 0.60 (0.53 - 0.68)     | $6.68 \times 10^{-15}$ | 83             | 0.32 - 1.11   |
| Smoking                     | Yes vs. No                                      | 10879/29086             | 18        | 1.55 (1.23 - 1.96)     | $2.58 \times 10^{-4}$  | 80             | 0.67 - 3.59   |
| Solid organ transplantation | Yes vs. No                                      | 1611/2541               | 4         | 2.86 (0.80 - 10.22)    | $1.06 \times 10^{-1}$  | 53             | 0.02 - 384.59 |
| Vomiting                    | Yes vs. No                                      | 1391/2322               | 5         | 1.42 (1.04 - 1.94)     | $2.82 \times 10^{-2}$  | 0              | 0.85 - 2.35   |
| <i>ICU admission</i>        |                                                 |                         |           |                        |                        |                |               |
| ACEi                        | Yes vs. No                                      | 1171/5256               | 6         | 1.01 (0.77 - 1.33)     | $9.49 \times 10^{-1}$  | 42             | 0.50 - 2.04   |
| ACEi/ARBs                   | Yes vs. No                                      | 1779/9711               | 9         | 1.19 (0.79 - 1.79)     | $3.99 \times 10^{-1}$  | 89             | 0.30 - 4.66   |
| Age                         | >65 vs. <65                                     | 1827/9289               | 10        | 1.34 (0.90 - 1.99)     | $1.53 \times 10^{-1}$  | 90             | 0.33 - 5.46   |
| Age                         | Per 1 year increase                             | 780/2673                | 5         | 0.999 (0.987 - 1.011)  | $8.28 \times 10^{-1}$  | 69             | 0.959 - 1.040 |

| Predictors                                       | Level of comparison                             | N events/N participants | N studies | RE summary OR (95% CI) | P-value                | I <sup>2</sup> | 95% PI         |
|--------------------------------------------------|-------------------------------------------------|-------------------------|-----------|------------------------|------------------------|----------------|----------------|
| Any comorbidity                                  | Yes vs. No                                      | 1637/6614               | 12        | 2.17 (1.44 - 3.27)     | $2.21 \times 10^{-4}$  | 80             | 0.50 - 9.35    |
| ARBs                                             | Yes vs. No                                      | 1110/4868               | 5         | 1.04 (0.75 - 1.45)     | $7.93 \times 10^{-1}$  | 56             | 0.39 - 2.82    |
| Asthma                                           | Yes vs. No                                      | 639/2348                | 6         | 1.04 (0.70 - 1.54)     | $8.48 \times 10^{-1}$  | 27             | 0.43 - 2.53    |
| Autoimmune diseases/<br>Rheumatological diseases | Yes vs. No                                      | 1196/4473               | 4         | 1.07 (0.71 - 1.61)     | $7.51 \times 10^{-1}$  | 0              | 0.44 - 2.62    |
| Bilateral involvement                            | Yes vs. No                                      | 319/1070                | 4         | 3.13 (1.67 - 5.88)     | $3.82 \times 10^{-4}$  | 48             | 0.34 - 29.19   |
| BMI                                              | >30 kg/m <sup>2</sup> vs. <30 kg/m <sup>2</sup> | 1273/4615               | 10        | 1.94 (1.40 - 2.68)     | $7.03 \times 10^{-5}$  | 70             | 0.70 - 5.39    |
| Cancer                                           | Yes vs. No                                      | 2520/11354              | 23        | 1.00 (0.74 - 1.36)     | $9.86 \times 10^{-1}$  | 59             | 0.33 - 3.07    |
| Cardiovascular disease                           | Yes vs. No                                      | 1312/5156               | 13        | 1.47 (1.11 - 1.94)     | $7.25 \times 10^{-3}$  | 47             | 0.72 - 3.00    |
| Cerebrovascular disease                          | Yes vs. No                                      | 854/4514                | 6         | 1.08 (0.63 - 1.86)     | $7.82 \times 10^{-1}$  | 71             | 0.20 - 5.78    |
| Chronic kidney disease                           | Yes vs. No                                      | 1623/7408               | 13        | 1.59 (1.18 - 2.13)     | $2.23 \times 10^{-3}$  | 49             | 0.72 - 3.49    |
| Chronic liver disease                            | Yes vs. No                                      | 193/1297                | 5         | 2.05 (1.14 - 3.70)     | $1.67 \times 10^{-2}$  | 0              | 0.79 - 5.35    |
| Chronic lung disease                             | Yes vs. No                                      | 1239/4927               | 9         | 1.52 (1.12 - 2.04)     | $6.37 \times 10^{-3}$  | 33             | 0.77 - 2.98    |
| Cirrhosis                                        | Yes vs. No                                      | 462/1598                | 4         | 1.11 (0.56 - 2.17)     | $7.71 \times 10^{-1}$  | 0              | 0.25 - 4.85    |
| COPD                                             | Yes vs. No                                      | 1046/5256               | 13        | 1.33 (0.95 - 1.86)     | $9.12 \times 10^{-2}$  | 34             | 0.58 - 3.05    |
| Coronary heart disease                           | Yes vs. No                                      | 1054/5466               | 8         | 1.26 (0.83 - 1.91)     | $2.72 \times 10^{-1}$  | 73             | 0.33 - 4.77    |
| Cough                                            | Yes vs. No                                      | 541/2108                | 8         | 1.02 (0.82 - 1.27)     | $8.46 \times 10^{-1}$  | 0              | 0.78 - 1.34    |
| Diabetes mellitus                                | Yes vs. No                                      | 2635/13691              | 26        | 1.53 (1.28 - 1.84)     | $3.33 \times 10^{-6}$  | 57             | 0.79 - 2.97    |
| Diarrhea                                         | Yes vs. No                                      | 569/2086                | 8         | 1.01 (0.79 - 1.29)     | $9.66 \times 10^{-1}$  | 2              | 0.72 - 1.41    |
| Dyslipidemia                                     | Yes vs. No                                      | 383/2140                | 4         | 0.83 (0.44 - 1.58)     | $5.79 \times 10^{-1}$  | 77             | 0.05 - 13.45   |
| Dyspnea                                          | Yes vs. No                                      | 689/2493                | 9         | 3.99 (2.09 - 7.60)     | $2.59 \times 10^{-5}$  | 88             | 0.42 - 38.17   |
| Expectoration                                    | Yes vs. No                                      | 370/1391                | 5         | 0.79 (0.50 - 1.24)     | $3.02 \times 10^{-1}$  | 29             | 0.25 - 2.49    |
| Fatigue                                          | Yes vs. No                                      | 192/881                 | 6         | 1.06 (0.58 - 1.92)     | $8.58 \times 10^{-1}$  | 62             | 0.17 - 6.52    |
| Fever                                            | Yes vs. No                                      | 752/3294                | 11        | 1.07 (0.79 - 1.45)     | $6.61 \times 10^{-1}$  | 33             | 0.53 - 2.15    |
| GI symptoms                                      | Yes vs. No                                      | 269/2286                | 5         | 1.11 (0.64 - 1.94)     | $7.06 \times 10^{-1}$  | 63             | 0.19 - 6.59    |
| Headache                                         | Yes vs. No                                      | 588/2341                | 9         | 0.64 (0.46 - 0.87)     | $5.17 \times 10^{-3}$  | 0              | 0.44 - 0.93    |
| Heart failure                                    | Yes vs. No                                      | 1007/4760               | 8         | 1.28 (0.86 - 1.91)     | $2.29 \times 10^{-1}$  | 62             | 0.39 - 4.15    |
| HIV infection                                    | Yes vs. No                                      | 339/1527                | 3         | 1.15 (0.49 - 2.68)     | $7.54 \times 10^{-1}$  | 0              | 0.005 - 280.92 |
| Hypertension                                     | Yes vs. No                                      | 2601/13888              | 25        | 1.78 (1.40 - 2.26)     | $1.91 \times 10^{-6}$  | 80             | 0.63 - 5.06    |
| Myalgia                                          | Yes vs. No                                      | 379/1412                | 5         | 0.95 (0.59 - 1.53)     | $8.46 \times 10^{-1}$  | 48             | 0.24 - 3.85    |
| Nausea/Vomiting                                  | Yes vs. No                                      | 312/1344                | 4         | 0.85 (0.28 - 2.56)     | $7.66 \times 10^{-1}$  | 64             | 0.01 - 71.89   |
| Obesity                                          | Yes vs. No                                      | 781/5071                | 6         | 1.31 (0.63 - 2.7)      | $4.70 \times 10^{-1}$  | 83             | 0.13 - 13.12   |
| Pharyngalgia                                     | Yes vs. No                                      | 377/1622                | 6         | 1.21 (0.63 - 2.31)     | $5.64 \times 10^{-1}$  | 56             | 0.20 - 7.48    |
| Procalcitonin                                    | >0.5 ng/ml vs. <0.5 ng/ml                       | 365/1162                | 4         | 3.11 (1.55 - 6.24)     | $1.44 \times 10^{-3}$  | 75             | 0.15 - 63.87   |
| Sex                                              | Female vs. Male                                 | 2852/17684              | 32        | 0.53 (0.45 - 0.61)     | $2.91 \times 10^{-17}$ | 50             | 0.30 - 0.93    |
| Smoking                                          | Yes vs. No                                      | 1570/6914               | 13        | 1.20 (1.04 - 1.37)     | $1.09 \times 10^{-2}$  | 0              | 1.02 - 1.40    |
| Solid organ transplantation                      | Yes vs. No                                      | 490/1576                | 4         | 1.17 (0.64 - 2.13)     | $6.03 \times 10^{-1}$  | 0              | 0.32 - 4.36    |
| <i>Invasive Mechanical Ventilation</i>           |                                                 |                         |           |                        |                        |                |                |
| ACEi/ARBs                                        | Yes vs. No                                      | 517/3968                | 8         | 1.24 (0.82 - 1.87)     | $3.04 \times 10^{-1}$  | 62             | 0.37 - 4.13    |
| Age                                              | >65 vs. <65                                     | 1179/13839              | 7         | 1.81 (1.17 - 2.80)     | $8.09 \times 10^{-3}$  | 88             | 0.41 - 7.91    |

| Predictors                       | Level of comparison                             | N events/N participants | N studies | RE summary OR (95% CI) | P-value                | I <sup>2</sup> | 95% PI        |
|----------------------------------|-------------------------------------------------|-------------------------|-----------|------------------------|------------------------|----------------|---------------|
| Any comorbidity                  | Yes vs. No                                      | 1786/9323               | 5         | 1.07 (0.75 - 1.51)     | $7.16 \times 10^{-1}$  | 75             | 0.35 - 3.27   |
| Asthma                           | Yes vs. No                                      | 1006/5040               | 8         | 1.04 (0.83 - 1.29)     | $7.47 \times 10^{-1}$  | 0              | 0.79 - 1.36   |
| BMI                              | >30 kg/m <sup>2</sup> vs. <30 kg/m <sup>2</sup> | 1211/4966               | 9         | 1.57 (1.25 - 1.97)     | $9.58 \times 10^{-5}$  | 47             | 0.88 - 2.81   |
| Cancer                           | Yes vs. No                                      | 1189/10335              | 11        | 1.59 (1.27 - 2.00)     | $7.17 \times 10^{-5}$  | 0              | 1.22 - 2.08   |
| Cardiovascular disease           | Yes vs. No                                      | 1422/8367               | 7         | 1.11 (0.61 - 2.02)     | $7.24 \times 10^{-1}$  | 88             | 0.15 - 8.19   |
| Chronic lung disease             | Yes vs. No                                      | 1557/8307               | 7         | 1.09 (0.62 - 1.91)     | $7.77 \times 10^{-1}$  | 86             | 0.16 - 7.31   |
| COPD                             | Yes vs. No                                      | 853/4271                | 7         | 1.71 (0.95 - 3.08)     | $7.60 \times 10^{-2}$  | 72             | 0.28 - 10.41  |
| Coronary heart disease           | Yes vs. No                                      | 939/10555               | 7         | 1.80 (1.32 - 2.45)     | $2.10 \times 10^{-4}$  | 34             | 0.87 - 3.72   |
| Diabetes mellitus                | Yes vs. No                                      | 3106/24237              | 22        | 1.71 (1.37 - 2.13)     | $1.98 \times 10^{-6}$  | 78             | 0.70 - 4.18   |
| Fever                            | Yes vs. No                                      | 423/1357                | 5         | 0.92 (0.70 - 1.20)     | $5.40 \times 10^{-1}$  | 5              | 0.57 - 1.49   |
| Heart failure                    | Yes vs. No                                      | 1022/10190              | 7         | 1.46 (0.93 - 2.30)     | $9.77 \times 10^{-2}$  | 66             | 0.38 - 5.61   |
| HIV infection                    | Yes vs. No                                      | 1292/7296               | 5         | 1.27 (0.63 - 2.55)     | $5.04 \times 10^{-1}$  | 0              | 0.41 - 3.95   |
| Hypertension                     | Yes vs. No                                      | 1851/14624              | 17        | 1.69 (1.36 - 2.11)     | $2.44 \times 10^{-6}$  | 67             | 0.79 - 3.63   |
| Sex                              | Female vs. Male                                 | 2537/12927              | 16        | 0.62 (0.55 - 0.70)     | $1.98 \times 10^{-13}$ | 20             | 0.47 - 0.81   |
| <i>Mortality</i>                 |                                                 |                         |           |                        |                        |                |               |
| Abdominal pain                   | Yes vs. No                                      | 175/1919                | 5         | 1.14 (0.47 - 2.77)     | $7.68 \times 10^{-1}$  | 0              | 0.27 - 4.81   |
| ACEi                             | Yes vs. No                                      | 3086/13195              | 9         | 1.38 (1.18 - 1.62)     | $7.50 \times 10^{-5}$  | 45             | 0.94 - 2.03   |
| ACEi/ARBs                        | Yes vs. No                                      | 3284/22879              | 21        | 1.29 (1.00 - 1.66)     | $5.33 \times 10^{-2}$  | 86             | 0.44 - 3.80   |
| Age                              | >60 vs. <60                                     | 9780/96705              | 22        | 9.59 (7.46 - 12.34)    | $1.64 \times 10^{-69}$ | 88             | 3.31 - 27.77  |
| Age                              | >65 vs. <65                                     | 5706/31260              | 17        | 6.43 (4.53 - 9.11)     | $1.62 \times 10^{-25}$ | 93             | 1.57 - 26.25  |
| Age                              | Per 1 year increase                             | 2090/12958              | 26        | 1.073 (1.063 - 1.082)  | $1.12 \times 10^{-54}$ | 78             | 1.03 - 1.118  |
| Altered mental status            | Yes vs. No                                      | 6651/32870              | 5         | 6.11 (3.16 - 11.82)    | $7.29 \times 10^{-8}$  | 92             | 0.60 - 62.08  |
| Anorexia                         | Yes vs. No                                      | 659/4921                | 10        | 1.43 (0.81 - 2.54)     | $2.14 \times 10^{-1}$  | 71             | 0.25 - 8.08   |
| Anticoagulant therapy            | Yes vs. No                                      | 1729/4598               | 6         | 1.28 (1.11 - 1.48)     | $8.07 \times 10^{-4}$  | 0              | 1.04 - 1.57   |
| Any comorbidity                  | Yes vs. No                                      | 14510/61938             | 23        | 3.68 (2.92 - 4.65)     | $7.09 \times 10^{-28}$ | 90             | 1.48 - 9.19   |
| Any immunosuppressive medication | Yes vs. No                                      | 6883/20338              | 4         | 1.22 (1.12 - 1.33)     | $9.60 \times 10^{-6}$  | 0              | 1.01 - 1.48   |
| Any neurological disease         | Yes vs. No                                      | 8549/23533              | 6         | 3.41 (2.08 - 5.62)     | $1.30 \times 10^{-6}$  | 93             | 0.66 - 17.69  |
| ARBs                             | Yes vs. No                                      | 3086/13195              | 9         | 1.33 (1.13 - 1.57)     | $7.38 \times 10^{-4}$  | 56             | 0.86 - 2.05   |
| Arthralgia/Myalgia               | Yes vs. No                                      | 896/3676                | 5         | 0.55 (0.45 - 0.68)     | $3.57 \times 10^{-8}$  | 0              | 0.39 - 0.78   |
| Asthma                           | Yes vs. No                                      | 16985/70354             | 26        | 0.90 (0.75 - 1.07)     | $2.34 \times 10^{-1}$  | 56             | 0.50 - 1.61   |
| Atrial fibrillation              | Yes vs. No                                      | 832/3498                | 7         | 2.03 (1.26 - 3.26)     | $3.36 \times 10^{-3}$  | 41             | 0.63 - 6.52   |
| Beta-blockers                    | Yes vs. No                                      | 2659/10257              | 7         | 1.94 (1.48 - 2.55)     | $1.45 \times 10^{-6}$  | 81             | 0.87 - 4.33   |
| Bilateral involvement            | Yes vs. No                                      | 1004/6041               | 13        | 1.13 (0.82 - 1.56)     | $4.51 \times 10^{-1}$  | 58             | 0.43 - 2.94   |
| BMI                              | >30 kg/m <sup>2</sup> vs. <30 kg/m <sup>2</sup> | 2478/12825              | 19        | 0.94 (0.78 - 1.12)     | $4.69 \times 10^{-1}$  | 57             | 0.52 - 1.69   |
| BMI                              | Per 1 kg/m <sup>2</sup> increase                | 561/3263                | 7         | 0.992 (0.975 - 1.009)  | $3.37 \times 10^{-1}$  | 26             | 0.955 - 1.029 |
| Calcium channel blockers         | Yes vs. No                                      | 1103/7133               | 6         | 1.67 (1.30 - 2.14)     | $4.57 \times 10^{-5}$  | 18             | 1.00 - 2.78   |
| Cancer                           | Yes vs. No                                      | 16628/96639             | 32        | 2.15 (1.88 - 2.47)     | $1.67 \times 10^{-28}$ | 51             | 1.32 - 3.51   |
| Cardiovascular disease           | Yes vs. No                                      | 14682/76858             | 20        | 3.72 (2.81 - 4.93)     | $6.10 \times 10^{-20}$ | 95             | 1.11 - 12.43  |
| Cerebrovascular disease          | Yes vs. No                                      | 2367/17176              | 24        | 3.13 (2.41 - 4.07)     | $1.72 \times 10^{-17}$ | 60             | 1.16 - 8.43   |

| Predictors                  | Level of comparison                       | N events/N participants | N studies | RE summary OR (95% CI) | P-value                | I <sup>2</sup> | 95% PI        |
|-----------------------------|-------------------------------------------|-------------------------|-----------|------------------------|------------------------|----------------|---------------|
| Chest pain                  | Yes vs. No                                | 490/6051                | 10        | 1.01 (0.64 - 1.61)     | $9.57 \times 10^{-1}$  | 37             | 0.33 - 3.15   |
| Chills                      | Yes vs. No                                | 1088/4815               | 6         | 0.88 (0.52 - 1.48)     | $6.19 \times 10^{-1}$  | 68             | 0.21 - 3.68   |
| Chronic kidney disease      | Yes vs. No                                | 18124/90607             | 46        | 3.05 (2.54 - 3.65)     | $2.37 \times 10^{-33}$ | 81             | 1.15 - 8.09   |
| Chronic liver disease       | Yes vs. No                                | 17426/60743             | 14        | 1.44 (1.20 - 1.74)     | $1.16 \times 10^{-4}$  | 16             | 1.01 - 2.06   |
| Chronic lung disease        | Yes vs. No                                | 6524/41304              | 14        | 2.39 (1.87 - 3.05)     | $2.31 \times 10^{-12}$ | 72             | 1.11 - 5.13   |
| Consolidation               | Yes vs. No                                | 433/2898                | 5         | 1.61 (1.21 - 2.14)     | $9.61 \times 10^{-4}$  | 18             | 0.85 - 3.07   |
| COPD                        | Yes vs. No                                | 12409/65294             | 37        | 2.22 (1.89 - 2.62)     | $3.80 \times 10^{-22}$ | 51             | 1.16 - 4.27   |
| Coronary heart disease      | Yes vs. No                                | 4953/35011              | 36        | 2.87 (2.46 - 3.35)     | $3.16 \times 10^{-41}$ | 57             | 1.49 - 5.54   |
| Cough                       | Yes vs. No                                | 8651/44314              | 21        | 0.80 (0.69 - 0.92)     | $2.76 \times 10^{-3}$  | 66             | 0.48 - 1.31   |
| CRP                         | >10 mg/L vs. <10 mg/L                     | 486/3822                | 6         | 7.27 (2.95 - 17.91)    | $1.64 \times 10^{-5}$  | 69             | 0.50 - 105.30 |
| Dementia                    | Yes vs. No                                | 6342/20991              | 8         | 3.26 (2.62 - 4.06)     | $7.19 \times 10^{-26}$ | 48             | 1.94 - 5.47   |
| Diabetes mellitus           | Yes vs. No                                | 17863/116246            | 45        | 2.15 (1.82 - 2.53)     | $7.54 \times 10^{-20}$ | 91             | 0.80 - 5.74   |
| Diarrhea                    | Yes vs. No                                | 2602/11763              | 15        | 0.63 (0.48 - 0.82)     | $8.47 \times 10^{-4}$  | 56             | 0.29 - 1.37   |
| Dizziness                   | Yes vs. No                                | 216/2889                | 7         | 1.47 (0.87 - 2.50)     | $1.52 \times 10^{-1}$  | 0              | 0.73 - 2.95   |
| Dyslipidemia                | Yes vs. No                                | 4854/19494              | 16        | 1.37 (1.08 - 1.74)     | $1.05 \times 10^{-2}$  | 74             | 0.62 - 3.01   |
| Dyspnea                     | Yes vs. No                                | 8625/44052              | 20        | 2.44 (1.92 - 3.10)     | $3.48 \times 10^{-13}$ | 89             | 0.91 - 6.57   |
| Expectoration               | Yes vs. No                                | 1953/10754              | 12        | 1.31 (1.03 - 1.66)     | $2.52 \times 10^{-2}$  | 54             | 0.69 - 2.49   |
| Fatigue                     | Yes vs. No                                | 2077/13231              | 15        | 0.99 (0.75 - 1.29)     | $9.16 \times 10^{-1}$  | 73             | 0.40 - 2.42   |
| Fever                       | Yes vs. No                                | 9332/73102              | 20        | 0.91 (0.73 - 1.13)     | $3.85 \times 10^{-1}$  | 87             | 0.39 - 2.14   |
| Ground-glass opacity        | Yes vs. No                                | 702/4702                | 8         | 0.84 (0.57 - 1.24)     | $3.76 \times 10^{-1}$  | 61             | 0.28 - 2.50   |
| Headache                    | Yes vs. No                                | 2627/13720              | 19        | 0.57 (0.39 - 0.85)     | $5.12 \times 10^{-3}$  | 69             | 0.15 - 2.14   |
| Heart failure               | Yes vs. No                                | 4232/39632              | 30        | 3.95 (2.95 - 5.29)     | $3.06 \times 10^{-20}$ | 84             | 0.94 - 16.69  |
| Hemoptysis                  | Yes vs. No                                | 1046/3239               | 6         | 0.95 (0.57 - 1.59)     | $8.50 \times 10^{-1}$  | 0              | 0.46 - 1.97   |
| History of VTE              | Yes vs. No                                | 936/4123                | 5         | 1.44 (0.96 - 2.15)     | $7.96 \times 10^{-2}$  | 20             | 0.56 - 3.66   |
| Hypertension                | Yes vs. No                                | 8869/72042              | 51        | 2.41 (2.10 - 2.77)     | $2.68 \times 10^{-36}$ | 80             | 1.08 - 5.37   |
| Immunocompromised state     | Yes vs. No                                | 4157/11617              | 10        | 2.10 (1.38 - 3.19)     | $5.32 \times 10^{-4}$  | 65             | 0.61 - 7.23   |
| LDH                         | >250 U/L vs. <250 U/L                     | 453/3967                | 6         | 6.12 (2.60 - 14.38)    | $3.30 \times 10^{-5}$  | 86             | 0.32 - 115.85 |
| Myalgia                     | Yes vs. No                                | 7087/38122              | 14        | 0.62 (0.44 - 0.87)     | $5.50 \times 10^{-3}$  | 82             | 0.20 - 1.95   |
| Nausea                      | Yes vs. No                                | 486/3321                | 7         | 0.97 (0.53 - 1.77)     | $9.18 \times 10^{-1}$  | 50             | 0.19 - 4.95   |
| Nausea/Vomiting             | Yes vs. No                                | 1780/8754               | 9         | 0.77 (0.57 - 1.02)     | $6.77 \times 10^{-2}$  | 36             | 0.40 - 1.47   |
| Nursing home                | Yes vs. No                                | 1071/6438               | 8         | 2.63 (1.20 - 5.77)     | $1.55 \times 10^{-2}$  | 91             | 0.17 - 41.6   |
| Obesity                     | Yes vs. No                                | 6657/25618              | 10        | 1.31 (0.95 - 1.82)     | $1.01 \times 10^{-1}$  | 83             | 0.48 - 3.63   |
| Obstructive sleep apnea     | Yes vs. No                                | 548/3732                | 6         | 1.42 (1.08 - 1.86)     | $1.16 \times 10^{-2}$  | 0              | 0.97 - 2.08   |
| Peripheral arterial disease | Yes vs. No                                | 2288/17376              | 5         | 2.14 (1.64 - 2.78)     | $1.87 \times 10^{-8}$  | 26             | 1.10 - 4.15   |
| Pharyngalgia                | Yes vs. No                                | 1944/8383               | 14        | 0.56 (0.45 - 0.70)     | $3.73 \times 10^{-7}$  | 0              | 0.44 - 0.72   |
| Platelets                   | <150.000 / $\mu$ L vs. >150.000 / $\mu$ L | 175/1821                | 5         | 2.70 (1.40 - 5.20)     | $3.14 \times 10^{-3}$  | 67             | 0.32 - 22.93  |
| Procalcitonin               | >0.5 ng/ml vs. <0.5 ng/ml                 | 793/3766                | 5         | 6.57 (2.85 - 15.11)    | $9.57 \times 10^{-6}$  | 77             | 0.39 - 109.33 |
| Respiratory rate            | >24 bpm vs. <24 bpm                       | 1201/5419               | 5         | 5.02 (2.58 - 9.77)     | $2.04 \times 10^{-6}$  | 89             | 0.49 - 51.78  |
| Rhinorrhea                  | Yes vs. No                                | 899/4894                | 5         | 0.49 (0.36 - 0.66)     | $3.99 \times 10^{-6}$  | 0              | 0.30 - 0.80   |

| Predictors                | Level of comparison                     | N events/N participants | N studies | RE summary OR (95% CI) | P-value                | I <sup>2</sup> | 95% PI        |
|---------------------------|-----------------------------------------|-------------------------|-----------|------------------------|------------------------|----------------|---------------|
| Sex                       | Female vs. Male                         | 24048/189232            | 53        | 0.71 (0.65 - 0.78)     | $2.01 \times 10^{-13}$ | 79             | 0.46 - 1.12   |
| Smoking                   | Yes vs. No                              | 7754/29951              | 34        | 1.50 (1.35 - 1.68)     | $8.72 \times 10^{-14}$ | 24             | 1.14 - 1.99   |
| SpO2                      | <90 % vs. >90 %                         | 1249/6330               | 5         | 4.08 (2.79 - 5.97)     | $3.70 \times 10^{-13}$ | 76             | 1.09 - 15.29  |
| Statins                   | Yes vs. No                              | 1811/5483               | 5         | 1.60 (1.31 - 1.95)     | $4.60 \times 10^{-6}$  | 58             | 0.89 - 2.84   |
| Vomiting                  | Yes vs. No                              | 416/3045                | 6         | 0.97 (0.55 - 1.71)     | $9.27 \times 10^{-1}$  | 0              | 0.44 - 2.16   |
| WBC                       | <4.000 / $\mu$ L vs. >4.000 / $\mu$ L   | 1006/4737               | 5         | 0.58 (0.40 - 0.84)     | $3.75 \times 10^{-3}$  | 31             | 0.22 - 1.50   |
| WBC                       | >10.000 / $\mu$ L vs. <10.000 / $\mu$ L | 495/4266                | 6         | 7.27 (2.89 - 18.29)    | $2.47 \times 10^{-5}$  | 92             | 0.28 - 186.15 |
| <i>Pulmonary Embolism</i> |                                         |                         |           |                        |                        |                |               |
| Cancer                    | Yes vs. No                              | 262/2180                | 4         | 0.89 (0.36 - 2.22)     | $8.03 \times 10^{-1}$  | 68             | 0.02 - 40.10  |

**Supplementary Table S5.** Results of the sensitivity analysis excluding the studies including only COVID-19 patients with a specific comorbid disorder.

| Predictors                                                                  | Level of comparison | N events/N participants | N studies | RE summary OR (95% CI) | P-value                | I <sup>2</sup> | 95% PI       |
|-----------------------------------------------------------------------------|---------------------|-------------------------|-----------|------------------------|------------------------|----------------|--------------|
| <i>Acute Respiratory Distress Syndrome</i>                                  |                     |                         |           |                        |                        |                |              |
| ACEi/ARBs                                                                   | Yes vs. No          | 228/1952                | 7         | 0.80 (0.62 - 1.04)     | $9.23 \times 10^{-2}$  | 0              | 0.57 - 1.12  |
| Diabetes mellitus                                                           | Yes vs. No          | 861/8201                | 6         | 2.38 (1.64 - 3.46)     | $5.49 \times 10^{-6}$  | 49             | 0.88 - 6.44  |
| Hypertension                                                                | Yes vs. No          | 398/5815                | 6         | 2.57 (1.83 - 3.61)     | $5.37 \times 10^{-8}$  | 66             | 0.95 - 6.92  |
| Sex                                                                         | Female vs. Male     | 342/1123                | 6         | 0.76 (0.45 - 1.29)     | $3.08 \times 10^{-1}$  | 66             | 0.15 - 3.89  |
| Smoking                                                                     | Yes vs. No          | 165/418                 | 4         | 0.60 (0.27 - 1.34)     | $2.16 \times 10^{-1}$  | 0              | 0.10 - 3.51  |
| <i>Composite Outcome 1 (ICU admission or Death)</i>                         |                     |                         |           |                        |                        |                |              |
| Any comorbidity                                                             | Yes vs. No          | 367/1002                | 6         | 1.53 (1.11 - 2.09)     | $8.64 \times 10^{-3}$  | 0              | 0.98 - 2.38  |
| Cough                                                                       | Yes vs. No          | 416/1255                | 6         | 0.78 (0.61 - 1.00)     | $4.80 \times 10^{-2}$  | 0              | 0.55 - 1.11  |
| Dyspnea                                                                     | Yes vs. No          | 442/1305                | 6         | 2.02 (1.57 - 2.61)     | $5.92 \times 10^{-8}$  | 0              | 1.41 - 2.90  |
| Fever                                                                       | Yes vs. No          | 757/2306                | 8         | 1.11 (0.76 - 1.64)     | $5.83 \times 10^{-1}$  | 52             | 0.41 - 3.06  |
| Sex                                                                         | Female vs. Male     | 1460/5518               | 17        | 0.69 (0.59 - 0.81)     | $3.65 \times 10^{-6}$  | 21             | 0.48 - 0.98  |
| Smoking                                                                     | Yes vs. No          | 336/904                 | 7         | 1.19 (0.80 - 1.77)     | $3.79 \times 10^{-1}$  | 0              | 0.71 - 2.00  |
| <i>Composite Outcome 2 (ICU admission, Mechanical Ventilation or Death)</i> |                     |                         |           |                        |                        |                |              |
| Diabetes mellitus                                                           | Yes vs. No          | 1395/5568               | 8         | 2.20 (1.17 - 4.13)     | $1.38 \times 10^{-2}$  | 89             | 0.27 - 18.02 |
| Hypertension                                                                | Yes vs. No          | 1346/5583               | 8         | 2.63 (1.59 - 4.34)     | $1.62 \times 10^{-4}$  | 84             | 0.52 - 13.19 |
| Sex                                                                         | Female vs. Male     | 1357/5589               | 6         | 0.91 (0.67 - 1.23)     | $5.46 \times 10^{-1}$  | 58             | 0.39 - 2.12  |
| <i>Hospitalization</i>                                                      |                     |                         |           |                        |                        |                |              |
| Age                                                                         | >60 vs. <60         | 6075/20,468             | 9         | 4.38 (3.18 - 6.04)     | $1.70 \times 10^{-19}$ | 90             | 1.64 - 11.73 |
| Any comorbidity                                                             | Yes vs. No          | 8742/17,028             | 19        | 4.14 (3.31 - 5.19)     | $3.60 \times 10^{-35}$ | 77             | 1.92 - 8.97  |
| Bilateral involvement                                                       | Yes vs. No          | 1159/1571               | 5         | 8.25 (3.36 - 20.25)    | $4.04 \times 10^{-6}$  | 62             | 0.53 - 128.4 |
| Cancer                                                                      | Yes vs. No          | 14,263/28,752           | 20        | 2.52 (1.85 - 3.43)     | $5.27 \times 10^{-9}$  | 84             | 0.78 - 8.13  |
| Cardiovascular disease                                                      | Yes vs. No          | 6429/23,087             | 17        | 3.34 (2.56 - 4.36)     | $9.50 \times 10^{-19}$ | 82             | 1.36 - 8.19  |
| Chronic lung disease                                                        | Yes vs. No          | 2793/15,463             | 15        | 1.89 (1.37 - 2.63)     | $1.30 \times 10^{-4}$  | 56             | 0.76 - 4.73  |
| COPD                                                                        | Yes vs. No          | 8961/17,241             | 13        | 3.80 (2.70 - 5.36)     | $2.67 \times 10^{-14}$ | 63             | 1.31 - 11.06 |
| Coronary heart disease                                                      | Yes vs. No          | 10,002/18,347           | 11        | 3.64 (2.51 - 5.30)     | $1.18 \times 10^{-11}$ | 85             | 1.01 - 13.10 |
| Diabetes mellitus                                                           | Yes vs. No          | 14,762/38,493           | 30        | 3.69 (3.14 - 4.34)     | $4.93 \times 10^{-56}$ | 74             | 1.90 - 7.17  |
| Fatigue                                                                     | Yes vs. No          | 1310/3110               | 8         | 1.39 (0.70 - 2.77)     | $3.51 \times 10^{-1}$  | 88             | 0.15 - 13.14 |
| GI symptoms                                                                 | Yes vs. No          | 525/1735                | 6         | 1.89 (0.91 - 3.89)     | $8.56 \times 10^{-2}$  | 80             | 0.19 - 18.87 |
| Heart failure                                                               | Yes vs. No          | 9779/18,298             | 12        | 6.65 (4.02 - 11.01)    | $1.74 \times 10^{-13}$ | 84             | 1.16 - 38.22 |
| Hypertension                                                                | Yes vs. No          | 13,440/27,367           | 28        | 3.72 (3.11 - 4.46)     | $3.52 \times 10^{-46}$ | 85             | 1.67 - 8.32  |
| Myalgia                                                                     | Yes vs. No          | 940/2031                | 9         | 0.68 (0.42 - 1.12)     | $1.34 \times 10^{-1}$  | 77             | 0.15 - 3.18  |
| Obesity                                                                     | Yes vs. No          | 5796/19,319             | 8         | 2.15 (1.68 - 2.77)     | $1.96 \times 10^{-9}$  | 56             | 1.11 - 4.20  |

| Predictors                             | Level of comparison                             | N events/N participants | N studies | RE summary OR (95% CI) | P-value                | I <sup>2</sup> | 95% PI        |
|----------------------------------------|-------------------------------------------------|-------------------------|-----------|------------------------|------------------------|----------------|---------------|
| Sex                                    | Female vs. Male                                 | 16,297/41,341           | 37        | 0.63 (0.55 - 0.71)     | $4.50 \times 10^{-13}$ | 82             | 0.34 - 1.17   |
| Smoking                                | Yes vs. No                                      | 10,789/28,717           | 17        | 1.63 (1.28 - 2.07)     | $6.07 \times 10^{-5}$  | 80             | 0.71 - 3.75   |
| <i>ICU admission</i>                   |                                                 |                         |           |                        |                        |                |               |
| Age                                    | >60 vs. <60                                     | 455/2948                | 8         | 1.99 (1.22 - 3.24)     | $5.75 \times 10^{-3}$  | 73             | 0.45 - 8.81   |
| Age                                    | >65 vs. <65                                     | 1853/9417               | 12        | 1.29 (0.88 - 1.89)     | $1.87 \times 10^{-1}$  | 89             | 0.33 - 5.05   |
| Chest pain                             | Yes vs. No                                      | 264/1528                | 5         | 1.23 (0.73 - 2.08)     | $4.46 \times 10^{-1}$  | 27             | 0.33 - 4.53   |
| Chronic liver disease                  | Yes vs. No                                      | 288/1605                | 10        | 1.89 (1.10 - 3.27)     | $2.21 \times 10^{-2}$  | 0              | 1.00 - 3.60   |
| Chronic lung disease                   | Yes vs. No                                      | 1298/5181               | 13        | 1.50 (1.16 - 1.94)     | $2.03 \times 10^{-3}$  | 16             | 0.92 - 2.45   |
| Cough                                  | Yes vs. No                                      | 826/2874                | 22        | 0.94 (0.78 - 1.15)     | $5.60 \times 10^{-1}$  | 0              | 0.77 - 1.16   |
| Diarrhea                               | Yes vs. No                                      | 713/2521                | 16        | 0.99 (0.80 - 1.24)     | $9.49 \times 10^{-1}$  | 0              | 0.78 - 1.26   |
| Dyspnea                                | Yes vs. No                                      | 975/3259                | 23        | 4.25 (2.71 - 6.68)     | $3.44 \times 10^{-10}$ | 78             | 0.65 - 27.95  |
| Expectoration                          | Yes vs. No                                      | 432/1652                | 9         | 0.76 (0.51 - 1.14)     | $1.86 \times 10^{-1}$  | 19             | 0.35 - 1.67   |
| Fatigue                                | Yes vs. No                                      | 208/965                 | 7         | 1.02 (0.60 - 1.74)     | $9.36 \times 10^{-1}$  | 55             | 0.22 - 4.71   |
| Fever                                  | Yes vs. No                                      | 1037/4074               | 25        | 1.08 (0.88 - 1.32)     | $4.51 \times 10^{-1}$  | 4              | 0.80 - 1.46   |
| Headache                               | Yes vs. No                                      | 815/2839                | 18        | 0.61 (0.46 - 0.81)     | $5.16 \times 10^{-4}$  | 0              | 0.45 - 0.83   |
| Sex                                    | Female vs. Male                                 | 3194/18,638             | 48        | 0.52 (0.46 - 0.59)     | $6.38 \times 10^{-27}$ | 27             | 0.35 - 0.78   |
| <i>Invasive Mechanical Ventilation</i> |                                                 |                         |           |                        |                        |                |               |
| ACEi/ARBs                              | Yes vs. No                                      | 528/4068                | 9         | 1.18 (0.79 - 1.77)     | $4.19 \times 10^{-1}$  | 61             | 0.37 - 3.81   |
| Age                                    | >65 vs. <65                                     | 1268/13,959             | 9         | 1.68 (1.10 - 2.55)     | $1.58 \times 10^{-2}$  | 86             | 0.43 - 6.53   |
| Chronic lung disease                   | Yes vs. No                                      | 1578/8334               | 8         | 1.14 (0.65 - 1.98)     | $6.54 \times 10^{-1}$  | 85             | 0.18 - 6.99   |
| Solid organ transplantation            | Yes vs. No                                      | 253/780                 | 4         | 1.36 (0.64 - 2.88)     | $4.22 \times 10^{-1}$  | 18             | 0.15 - 12.3   |
| <i>Mortality</i>                       |                                                 |                         |           |                        |                        |                |               |
| Abdominal pain                         | Yes vs. No                                      | 214/2114                | 7         | 1.00 (0.50 - 2.03)     | $9.92 \times 10^{-1}$  | 0              | 0.40 - 2.52   |
| ACEi/ARBs                              | Yes vs. No                                      | 3345/23,201             | 26        | 1.29 (1.01 - 1.64)     | $4.37 \times 10^{-2}$  | 84             | 0.44 - 3.72   |
| Age                                    | >60 vs. <60                                     | 9780/96,705             | 22        | 9.59 (7.46 - 12.34)    | $1.64 \times 10^{-69}$ | 88             | 3.31 - 27.77  |
| Age                                    | >65 vs. <65                                     | 5741/31,456             | 20        | 5.50 (3.90 - 7.77)     | $2.92 \times 10^{-22}$ | 93             | 1.31 - 23.10  |
| Age                                    | Per 1 year increase                             | 2206/13,307             | 31        | 1.072 (1.063 - 1.081)  | $2.66 \times 10^{-58}$ | 74             | 1.030 - 1.116 |
| Altered mental status                  | Yes vs. No                                      | 6720/33,221             | 9         | 4.53 (2.58 - 7.96)     | $1.52 \times 10^{-7}$  | 88             | 0.76 - 27.04  |
| Anosmia/Ageusia                        | Yes vs. No                                      | 279/2077                | 4         | 0.43 (0.23 - 0.80)     | $8.30 \times 10^{-3}$  | 0              | 0.11 - 1.70   |
| Anticoagulant therapy                  | Yes vs. No                                      | 1729/4552               | 6         | 1.28 (1.11 - 1.47)     | $8.21 \times 10^{-4}$  | 0              | 1.04 - 1.56   |
| Antiplatelet therapy                   | Yes vs. No                                      | 979/2057                | 4         | 1.36 (0.86 - 2.16)     | $1.84 \times 10^{-1}$  | 48             | 0.25 - 7.50   |
| Any comorbidity                        | Yes vs. No                                      | 14,596/62,373           | 28        | 3.57 (2.86 - 4.46)     | $3.68 \times 10^{-29}$ | 88             | 1.45 - 8.76   |
| AST                                    | >40 U/L vs. <40 U/L                             | 1167/5818               | 6         | 2.63 (1.86 - 3.73)     | $5.60 \times 10^{-8}$  | 72             | 0.92 - 7.56   |
| Atrial fibrillation                    | Yes vs. No                                      | 858/3597                | 8         | 2.27 (1.42 - 3.62)     | $5.78 \times 10^{-4}$  | 47             | 0.69 - 7.52   |
| Beta-blockers                          | Yes vs. No                                      | 2624/10,144             | 6         | 2.04 (1.54 - 2.70)     | $5.86 \times 10^{-7}$  | 83             | 0.85 - 4.86   |
| Bilateral involvement                  | Yes vs. No                                      | 1108/6466               | 18        | 1.31 (0.95 - 1.82)     | $1.02 \times 10^{-1}$  | 59             | 0.45 - 3.81   |
| BMI                                    | >30 kg/m <sup>2</sup> vs. <30 kg/m <sup>2</sup> | 2562/13,190             | 23        | 0.92 (0.78 - 1.09)     | $3.51 \times 10^{-1}$  | 50             | 0.53 - 1.60   |
| BMI                                    | Per 1 kg/m <sup>2</sup>                         | 566/3308                | 8         | 0.99 (0.974 - 1.007)   | $2.54 \times 10^{-1}$  | 21             | 0.958 - 1.024 |

| Predictors                  | Level of comparison                       | N events/N participants | N studies | RE summary OR (95% CI) | P-value                | I <sup>2</sup> | 95% PI       |
|-----------------------------|-------------------------------------------|-------------------------|-----------|------------------------|------------------------|----------------|--------------|
| Cancer                      | Yes vs. No                                | 16,659/96,716           | 34        | 2.14 (1.86 - 2.45)     | $6.63 \times 10^{-28}$ | 50             | 1.31 - 3.49  |
| Cardiovascular disease      | Yes vs. No                                | 14,764/77,158           | 25        | 3.27 (2.50 - 4.27)     | $4.88 \times 10^{-18}$ | 94             | 1.00 - 10.72 |
| Cerebrovascular disease     | Yes vs. No                                | 2454/17,301             | 28        | 3.01 (2.33 - 3.90)     | $4.11 \times 10^{-17}$ | 58             | 1.11 - 8.21  |
| Chills                      | Yes vs. No                                | 1088/4815               | 6         | 0.88 (0.52 - 1.48)     | $6.19 \times 10^{-1}$  | 68             | 0.21 - 3.68  |
| Chronic kidney disease      | Yes vs. No                                | 18,118/90,660           | 47        | 3.11 (2.59 - 3.73)     | $6.98 \times 10^{-34}$ | 81             | 1.16 - 8.30  |
| Chronic liver disease       | Yes vs. No                                | 17,463/60,995           | 17        | 1.45 (1.22 - 1.73)     | $2.78 \times 10^{-5}$  | 9              | 1.08 - 1.96  |
| Chronic lung disease        | Yes vs. No                                | 6499/41,268             | 14        | 2.42 (1.89 - 3.11)     | $3.29 \times 10^{-12}$ | 72             | 1.12 - 5.25  |
| Consolidation               | Yes vs. No                                | 459/3075                | 7         | 1.62 (1.12 - 2.35)     | $1.08 \times 10^{-2}$  | 45             | 0.62 - 4.23  |
| COPD                        | Yes vs. No                                | 12,238/64,682           | 39        | 2.23 (1.90 - 2.63)     | $4.85 \times 10^{-22}$ | 48             | 1.17 - 4.28  |
| Coronary heart disease      | Yes vs. No                                | 5014/35,251             | 40        | 2.85 (2.45 - 3.31)     | $2.60 \times 10^{-42}$ | 55             | 1.49 - 5.47  |
| Cough                       | Yes vs. No                                | 8723/44,659             | 26        | 0.79 (0.69 - 0.91)     | $1.44 \times 10^{-3}$  | 60             | 0.49 - 1.28  |
| Dementia                    | Yes vs. No                                | 6384/21,095             | 10        | 3.09 (2.48 - 3.86)     | $2.36 \times 10^{-23}$ | 48             | 1.84 - 5.21  |
| Diabetes mellitus           | Yes vs. No                                | 17,922/11,6431          | 49        | 2.18 (1.86 - 2.56)     | $2.80 \times 10^{-21}$ | 90             | 0.82 - 5.78  |
| Diarrhea                    | Yes vs. No                                | 2670/12,139             | 20        | 0.67 (0.52 - 0.87)     | $2.76 \times 10^{-3}$  | 49             | 0.32 - 1.42  |
| Dyslipidemia                | Yes vs. No                                | 4857/19,574             | 17        | 1.39 (1.09 - 1.78)     | $7.70 \times 10^{-3}$  | 73             | 0.63 - 3.09  |
| Dyspnea                     | Yes vs. No                                | 8710/44,491             | 26        | 2.69 (2.13 - 3.41)     | $1.63 \times 10^{-16}$ | 88             | 0.98 - 7.39  |
| Expectoration               | Yes vs. No                                | 2001/11,035             | 16        | 1.25 (1.00 - 1.55)     | $4.75 \times 10^{-2}$  | 44             | 0.70 - 2.21  |
| Fatigue                     | Yes vs. No                                | 2148/13,581             | 20        | 1.03 (0.80 - 1.32)     | $8.39 \times 10^{-1}$  | 67             | 0.44 - 2.39  |
| Fever                       | Yes vs. No                                | 9407/73,477             | 25        | 0.94 (0.77 - 1.16)     | $5.64 \times 10^{-1}$  | 85             | 0.41 - 2.18  |
| Ground-glass opacity        | Yes vs. No                                | 711/4864                | 10        | 0.83 (0.58 - 1.19)     | $3.06 \times 10^{-1}$  | 50             | 0.33 - 2.10  |
| Headache                    | Yes vs. No                                | 2666/13,915             | 21        | 0.56 (0.39 - 0.81)     | $1.92 \times 10^{-3}$  | 66             | 0.16 - 1.96  |
| Heart failure               | Yes vs. No                                | 4252/39,681             | 31        | 3.76 (2.80 - 5.05)     | $1.77 \times 10^{-18}$ | 85             | 0.85 - 16.63 |
| History of VTE              | Yes vs. No                                | 931/4087                | 5         | 1.28 (0.91 - 1.80)     | $1.57 \times 10^{-1}$  | 0              | 0.73 - 2.23  |
| Hypertension                | Yes vs. No                                | 9075/72,781             | 62        | 2.23 (1.95 - 2.56)     | $4.63 \times 10^{-31}$ | 79             | 0.96 - 5.18  |
| Insulin                     | Yes vs. No                                | 978/6082                | 4         | 2.57 (1.58 - 4.18)     | $1.52 \times 10^{-4}$  | 54             | 0.42 - 15.68 |
| LDH                         | >250 U/L vs. <250 U/L                     | 469/3951                | 7         | 5.38 (2.28 - 12.69)    | $1.20 \times 10^{-4}$  | 85             | 0.32 - 91.50 |
| Nausea                      | Yes vs. No                                | 486/3321                | 7         | 0.97 (0.53 - 1.77)     | $9.18 \times 10^{-1}$  | 50             | 0.19 - 4.95  |
| Obesity                     | Yes vs. No                                | 6716/25,849             | 14        | 1.29 (0.95 - 1.74)     | $9.70 \times 10^{-2}$  | 78             | 0.51 - 3.28  |
| Peripheral arterial disease | Yes vs. No                                | 2288/17,376             | 5         | 2.14 (1.64 - 2.78)     | $1.87 \times 10^{-8}$  | 26             | 1.10 - 4.15  |
| Pharyngalgia                | Yes vs. No                                | 1983/8578               | 16        | 0.56 (0.45 - 0.69)     | $1.53 \times 10^{-7}$  | 0              | 0.44 - 0.71  |
| Platelets                   | <150.000 / $\mu$ L vs. >150.000 / $\mu$ L | 197/1917                | 6         | 2.35 (1.24 - 4.43)     | $8.44 \times 10^{-3}$  | 66             | 0.35 - 15.95 |
| Pleural effusion            | Yes vs. No                                | 192/601                 | 6         | 1.40 (0.72 - 2.74)     | $3.23 \times 10^{-1}$  | 17             | 0.36 - 5.40  |
| Rhinorrhea                  | Yes vs. No                                | 899/4894                | 5         | 0.49 (0.36 - 0.66)     | $3.99 \times 10^{-6}$  | 0              | 0.30 - 0.80  |
| Sex                         | Female vs. Male                           | 24,174/189,620          | 63        | 0.72 (0.65 - 0.78)     | $1.53 \times 10^{-13}$ | 76             | 0.46 - 1.12  |
| Smoking                     | Yes vs. No                                | 7787/30,112             | 37        | 1.50 (1.35 - 1.67)     | $2.91 \times 10^{-14}$ | 22             | 1.14 - 1.98  |
| SpO <sub>2</sub>            | <90 % vs. >90 %                           | 1254/6397               | 6         | 4.27 (2.85 - 6.39)     | $1.71 \times 10^{-12}$ | 75             | 1.22 - 14.95 |
| Statins                     | Yes vs. No                                | 1776/5370               | 4         | 1.56 (1.26 - 1.93)     | $3.99 \times 10^{-5}$  | 66             | 0.68 - 3.57  |

| Predictors | Level of comparison         | N events/N participants | N studies | RE summary OR (95% CI) | P-value               | I <sup>2</sup> | 95% PI        |
|------------|-----------------------------|-------------------------|-----------|------------------------|-----------------------|----------------|---------------|
| WBC        | <4.000 /μL vs. >4.000 /μL   | 1006/4737               | 5         | 0.58 (0.40 - 0.84)     | $3.75 \times 10^{-3}$ | 31             | 0.22 - 1.50   |
| WBC        | >10.000 /μL vs. <10.000 /μL | 495/4266                | 6         | 7.27 (2.89 - 18.29)    | $2.47 \times 10^{-5}$ | 92             | 0.28 - 186.15 |

## Supplementary references

1. Abrishami M, Tohidinezhad F, Daneshvar R, et al. Ocular Manifestations of Hospitalized Patients with COVID-19 in Northeast of Iran. *Ocul Immunol Inflamm.* 2020;28(5):739-744. doi:10.1080/09273948.2020.1773868
2. Abrishami A, Khalili N, Dalili N, et al. Clinical and Radiologic Characteristics of COVID-19 in Patients With CKD. *Iran J Kidney Dis.* 2020;14(4):267-277. <http://www.ncbi.nlm.nih.gov/pubmed/32655021>.
3. Adegunsoye A, Ventura IB, Liarski VM. Association of Black Race with Outcomes in COVID-19 Disease: A Retrospective Cohort Study. *Ann Am Thorac Soc.* 2020;17(10):1336-1339. doi:10.1513/AnnalsATS.202006-583RL
4. Aggarwal A, Shrivastava A, Kumar A, Ali A. Clinical and Epidemiological Features of SARS-CoV-2 Patients in SARI Ward of a Tertiary Care Centre in New Delhi. *J Assoc Physicians India.* 2020;68(7):19-26. <http://www.ncbi.nlm.nih.gov/pubmed/32602676>.
5. Alberici F, Delbarba E, Manenti C, et al. A report from the Brescia Renal COVID Task Force on the clinical characteristics and short-term outcome of hemodialysis patients with SARS-CoV-2 infection. *Kidney Int.* 2020;98(1):20-26. doi:10.1016/j.kint.2020.04.030
6. Alkundi A, Mahmoud I, Musa A, Naveed S, Alshawwaf M. Clinical characteristics and outcomes of COVID-19 hospitalized patients with diabetes in the United Kingdom: A retrospective single centre study. *Diabetes Res Clin Pract.* 2020;165:108263. doi:10.1016/j.diabres.2020.108263
7. Allocca M, Guidelli GM, Borroni RG, et al. Clinical course of COVID-19 in 41 patients with immune-mediated inflammatory diseases: Experience from humanitas center, Milan. *Pharmacol Res.* 2020;160:105061. doi:10.1016/j.phrs.2020.105061
8. Aloisio E, Chibireva M, Serafini L, et al. A Comprehensive Appraisal of Laboratory Biochemistry Tests as Major Predictors of COVID-19 Severity. *Arch Pathol Lab Med.* 2020;144(12):1457-1464. doi:10.5858/arpa.2020-0389-SA
9. Aloisio E, Serafini L, Chibireva M, Dolci A, Panteghini M. Hypoalbuminemia and elevated D-dimer in COVID-19 patients: a call for result harmonization. *Clin Chem Lab Med.* 2020;58(11):e255-e256. doi:10.1515/cclm-2020-1038
10. Al-Salameh A, Lanoix J-P, Bennis Y, et al. Characteristics and outcomes of COVID-19 in hospitalized patients with and without diabetes. *Diabetes Metab Res Rev.* July 2020:e3388. doi:10.1002/dmrr.3388
11. Al-Samkari H, Karp Leaf RS, Dzik WH, et al. COVID-19 and coagulation: bleeding and thrombotic manifestations of SARS-CoV-2 infection. *Blood.* 2020;136(4):489-500. doi:10.1182/blood.2020006520
12. Amit M, Sorkin A, Chen J, et al. Clinical Course and Outcomes of Severe Covid-19: A National Scale Study. *J Clin Med.* 2020;9(7):2282. doi:10.3390/jcm9072282

13. Antinori S, Cossu MV, Ridolfo AL, et al. Compassionate remdesivir treatment of severe Covid-19 pneumonia in intensive care unit (ICU) and Non-ICU patients: Clinical outcome and differences in post-treatment hospitalisation status. *Pharmacol Res.* 2020;158:104899. doi:10.1016/j.phrs.2020.104899
14. Antony SJ, Davis MA, Davis MG, et al. Early use of tocilizumab in the prevention of adult respiratory failure in SARS-CoV-2 infections and the utilization of interleukin-6 levels in the management. *J Med Virol.* July 2020. doi:10.1002/jmv.26288
15. Arapović J, Skočibušić S. The first two months of the COVID-19 pandemic in Bosnia and Herzegovina: Single-center experience. *Bosn J basic Med Sci.* 2020;20(3):396-400. doi:10.17305/bjbms.2020.4838
16. Argenziano MG, Bruce SL, Slater CL, et al. Characterization and clinical course of 1000 patients with coronavirus disease 2019 in New York: retrospective case series. *BMJ.* 2020;369:m1996. doi:10.1136/bmj.m1996
17. Arlet J-B, de Luna G, Khimoud D, et al. Prognosis of patients with sickle cell disease and COVID-19: a French experience. *Lancet Haematol.* 2020;7(9):e632-e634. doi:10.1016/S2352-3026(20)30204-0
18. Artifoni M, Danic G, Gautier G, et al. Systematic assessment of venous thromboembolism in COVID-19 patients receiving thromboprophylaxis: incidence and role of D-dimer as predictive factors. *J Thromb Thrombolysis.* 2020;50(1):211-216. doi:10.1007/s11239-020-02146-z
19. Assaad S, Avrillon V, Fournier M-L, et al. High mortality rate in cancer patients with symptoms of COVID-19 with or without detectable SARS-CoV-2 on RT-PCR. *Eur J Cancer.* 2020;135:251-259. doi:10.1016/j.ejca.2020.05.028
20. Auld SC, Caridi-Scheible M, Blum JM, et al. ICU and Ventilator Mortality Among Critically Ill Adults With Coronavirus Disease 2019. *Crit Care Med.* 2020;48(9):e799-e804. doi:10.1097/CCM.0000000000004457
21. Ayanian S, Reyes J, Lynn L, Teufel K. The association between biomarkers and clinical outcomes in novel coronavirus pneumonia in a US cohort. *Biomark Med.* 2020;14(12):1091-1097. doi:10.2217/bmm-2020-0309
22. Ayerbe L, Risco C, Ayis S. The association between treatment with heparin and survival in patients with Covid-19. *J Thromb Thrombolysis.* 2020;50(2):298-301. doi:10.1007/s11239-020-02162-z
23. Azar KMJ, Shen Z, Romanelli RJ, et al. Disparities In Outcomes Among COVID-19 Patients In A Large Health Care System In California. *Health Aff.* 2020;39(7):1253-1262. doi:10.1377/hlthaff.2020.00598
24. Baqui P, Bica I, Marra V, Ercole A, van der Schaar M. Ethnic and regional variations in hospital mortality from COVID-19 in Brazil: a cross-sectional observational study. *Lancet Glob Heal.* 2020;8(8):e1018-e1026. doi:10.1016/S2214-109X(20)30285-0
25. Barbero P, Mugüerza L, Herraiz I, et al. SARS-CoV-2 in pregnancy: characteristics and outcomes of hospitalized and non-hospitalized women due

- to COVID-19. *J Matern neonatal Med.* July 2020.  
doi:10.1080/14767058.2020.1793320
26. Barman HA, Atici A, Sahin I, et al. Prognostic significance of cardiac injury in COVID-19 patients with and without coronary artery disease. *Coron Artery Dis.* June 2020. doi:10.1097/MCA.0000000000000914
  27. Barrasa H, Rello J, Tejada S, et al. SARS-CoV-2 in Spanish Intensive Care Units: Early experience with 15-day survival in Vitoria. *Anaesthesia, Crit care pain Med.* 2020;39(5):553-561. doi:10.1016/j.accpm.2020.04.001
  28. Bavaro DF, Polisenio M, Scardapane A, et al. Occurrence of Acute Pulmonary Embolism in COVID-19-A case series. *Int J Infect Dis.* 2020;98:225-226. doi:10.1016/j.ijid.2020.06.066
  29. Bazzan M, Montaruli B, Sciascia S, Cosseddu D, Norbiato C, Roccatello D. Low ADAMTS 13 plasma levels are predictors of mortality in COVID-19 patients. *Intern Emerg Med.* 2020;15(5):861-863. doi:10.1007/s11739-020-02394-0
  30. Bean DM, Kraljevic Z, Searle T, et al. Angiotensin-converting enzyme inhibitors and angiotensin II receptor blockers are not associated with severe COVID-19 infection in a multi-site UK acute hospital trust. *Eur J Heart Fail.* 2020;22(6):967-974. doi:10.1002/ejhf.1924
  31. Bellelli G, Rebora P, Valsecchi MG, Bonfanti P, Citerio G, COVID-19 Monza Team members. Frailty index predicts poor outcome in COVID-19 patients. *Intensive Care Med.* 2020;46(8):1634-1636. doi:10.1007/s00134-020-06087-2
  32. Benoy S, Traksel R, Verhaegh P, Broen J. COVID-19 in rheumatology outpatient clinics: Dutch mirror image to Lombardy, Italy. *Ann Rheum Dis.* June 2020. doi:10.1136/annrheumdis-2020-217765
  33. Benussi A, Pilotto A, Premi E, et al. Clinical characteristics and outcomes of inpatients with neurologic disease and COVID-19 in Brescia, Lombardy, Italy. *Neurology.* 2020;95(7):e910-e920. doi:10.1212/WNL.0000000000009848
  34. Bhargava A, Fukushima EA, Levine M, et al. Predictors for Severe COVID-19 Infection. *Clin Infect Dis.* 2020;71(8):1962-1968. doi:10.1093/cid/ciaa674
  35. Bhatla A, Mayer MM, Adusumalli S, et al. COVID-19 and cardiac arrhythmias. *Heart Rhythm.* 2020;17(9):1439-1444. doi:10.1016/j.hrthm.2020.06.016
  36. Biagi A, Rossi L, Malagoli A, et al. Clinical and epidemiological characteristics of 320 deceased patients with COVID-19 in an Italian Province: A retrospective observational study. *J Med Virol.* 2020;92(11):2718-2724. doi:10.1002/jmv.26147
  37. Bianchetti A, Rozzini R, Guerini F, et al. Clinical Presentation of COVID19 in Dementia Patients. *J Nutr Health Aging.* 2020;24(6):560-562. doi:10.1007/s12603-020-1389-1
  38. Bolondi G, Russo E, Gamberini E, et al. Iron metabolism and lymphocyte characterisation during Covid-19 infection in ICU patients: an observational cohort study. *World J Emerg Surg.* 2020;15(1):41. doi:10.1186/s13017-020-

39. Bonetti G, Manelli F, Patroni A, et al. Laboratory predictors of death from coronavirus disease 2019 (COVID-19) in the area of Valcamonica, Italy. *Clin Chem Lab Med.* 2020;58(7):1100-1105. doi:10.1515/cclm-2020-0459
40. Borghesi A, Zigliani A, Golemi S, et al. Chest X-ray severity index as a predictor of in-hospital mortality in coronavirus disease 2019: A study of 302 patients from Italy. *Int J Infect Dis.* 2020;96:291-293. doi:10.1016/j.ijid.2020.05.021
41. Borobia AM, Carcas AJ, Arnalich F, et al. A Cohort of Patients with COVID-19 in a Major Teaching Hospital in Europe. *J Clin Med.* 2020;9(6):1733. doi:10.3390/jcm9061733
42. Boscolo A, Spiezia L, Correale C, et al. Different Hypercoagulable Profiles in Patients with COVID-19 Admitted to the Internal Medicine Ward and the Intensive Care Unit. *Thromb Haemost.* 2020;120(10):1474-1477. doi:10.1055/s-0040-1714350
43. Bossini N, Alberici F, Delbarba E, et al. Kidney transplant patients with SARS-CoV-2 infection: The Brescia Renal COVID task force experience. *Am J Transplant.* 2020;20(11):3019-3029. doi:10.1111/ajt.16176
44. Bravi F, Flacco ME, Carradori T, et al. Predictors of severe or lethal COVID-19, including Angiotensin Converting Enzyme inhibitors and Angiotensin II Receptor Blockers, in a sample of infected Italian citizens. *PLoS One.* 2020;15(6):e0235248. doi:10.1371/journal.pone.0235248
45. Brill SE, Jarvis HC, Ozcan E, et al. COVID-19: a retrospective cohort study with focus on the over-80s and hospital-onset disease. *BMC Med.* 2020;18(1):194. doi:10.1186/s12916-020-01665-z
46. Brouns SH, Brüggemann R, Linkens AEMJH, et al. Mortality and the Use of Antithrombotic Therapies Among Nursing Home Residents with COVID-19. *J Am Geriatr Soc.* 2020;68(8):1647-1652. doi:10.1111/jgs.16664
47. Bruno G, Perelli S, Fabrizio C, Buccoliero GB. Short-term outcomes in individuals aged 75 or older with severe coronavirus disease (COVID-19): First observations from an infectious diseases unit in Southern Italy. *J Infect.* 2020;81(2):e86-e88. doi:10.1016/j.jinf.2020.05.024
48. Buckner FS, McCulloch DJ, Atluri V, et al. Clinical Features and Outcomes of 105 Hospitalized Patients With COVID-19 in Seattle, Washington. *Clin Infect Dis.* 2020;71(16):2167-2173. doi:10.1093/cid/ciaa632
49. Buscarini E, Manfredi G, Brambilla G, et al. GI symptoms as early signs of COVID-19 in hospitalised Italian patients. *Gut.* 2020;69(8):1547-1548. doi:10.1136/gutjnl-2020-321434
50. Busetto L, Bettini S, Fabris R, et al. Obesity and COVID-19: An Italian Snapshot. *Obesity.* 2020;28(9):1600-1605. doi:10.1002/oby.22918
51. Cabezudo-García P, Ciano-Petersen NL, Mena-Vázquez N, Pons-Pons G, Castro-Sánchez MV, Serrano-Castro PJ. Incidence and case fatality rate of COVID-19 in patients with active epilepsy. *Neurology.* 2020;95(10):e1417-

- e1425. doi:10.1212/WNL.00000000000010033
52. Cai S-H, Liao W, Chen S-W, Liu L-L, Liu S-Y, Zheng Z-D. Association between obesity and clinical prognosis in patients infected with SARS-CoV-2. *Infect Dis poverty*. 2020;9(1):80. doi:10.1186/s40249-020-00703-5
  53. Cao J, Tu W-J, Cheng W, et al. Clinical Features and Short-term Outcomes of 102 Patients with Coronavirus Disease 2019 in Wuhan, China. *Clin Infect Dis*. 2020;71(15):748-755. doi:10.1093/cid/ciaa243
  54. Cariou B, Hadjadj S, Wargny M, et al. Phenotypic characteristics and prognosis of inpatients with COVID-19 and diabetes: the CORONADO study. *Diabetologia*. 2020;63(8):1500-1515. doi:10.1007/s00125-020-05180-x
  55. Carlino MV, Valenti N, Cesaro F, et al. Predictors of Intensive Care Unit admission in patients with coronavirus disease 2019 (COVID-19). *Monaldi Arch chest Dis*. 2020;90(3). doi:10.4081/monaldi.2020.1410
  56. Carrasco G, Morillas J, Calizaya M, Baeza I, Molina R, Meije Y. ICU decision making based on Living Systematic Review strategy during SARS-CoV-2 pandemic. Results of a prospective case series. *Med intensiva*. 2020;44(8):516-519. doi:10.1016/j.medin.2020.06.001
  57. Caussy C, Pattou F, Wallet F, et al. Prevalence of obesity among adult inpatients with COVID-19 in France. *Lancet Diabetes Endocrinol*. 2020;8(7):562-564. doi:10.1016/S2213-8587(20)30160-1
  58. de Ceano-Vivas M, Martín-Espín I, Del Rosal T, et al. SARS-CoV-2 infection in ambulatory and hospitalised Spanish children. *Arch Dis Child*. 2020;105(8):808-809. doi:10.1136/archdischild-2020-319366
  59. Cecconi M, Piovani D, Brunetta E, et al. Early Predictors of Clinical Deterioration in a Cohort of 239 Patients Hospitalized for Covid-19 Infection in Lombardy, Italy. *J Clin Med*. 2020;9(5):1548. doi:10.3390/jcm9051548
  60. Cen Y, Chen X, Shen Y, et al. Risk factors for disease progression in patients with mild to moderate coronavirus disease 2019-a multi-centre observational study. *Clin Microbiol Infect*. 2020;26(9):1242-1247. doi:10.1016/j.cmi.2020.05.041
  61. Chamorro-Pareja N, Parthasarathy S, Annam J, Hoffman J, Coyle C, Kishore P. Letter to the editor: Unexpected high mortality in COVID-19 and diabetic ketoacidosis. *Metabolism*. 2020;110:154301. doi:10.1016/j.metabol.2020.154301
  62. Chan SSW, Christopher D, Tan GB, et al. Peripheral lymphocyte subset alterations in COVID-19 patients. *Int J Lab Hematol*. 2020;42(5):e199-e203. doi:10.1111/ijlh.13276
  63. Chao JY, Derespina KR, Herold BC, et al. Clinical Characteristics and Outcomes of Hospitalized and Critically Ill Children and Adolescents with Coronavirus Disease 2019 at a Tertiary Care Medical Center in New York City. *J Pediatr*. 2020;223:14-19. doi:10.1016/j.jpeds.2020.05.006
  64. Chaudhry ZS, Williams JD, Vahia A, et al. Clinical characteristics and outcomes of COVID-19 in solid organ transplant recipients: A cohort study.

- Am J Transplant.* 2020;20(11):3051-3060. doi:10.1111/ajt.16188
65. Chen J, Qi T, Liu L, et al. Clinical progression of patients with COVID-19 in Shanghai, China. *J Infect.* 2020;80(5):e1-e6. doi:10.1016/j.jinf.2020.03.004
  66. Chen T, Wu D, Chen H, et al. Clinical characteristics of 113 deceased patients with coronavirus disease 2019: retrospective study. *BMJ.* 2020;368:m1091. doi:10.1136/bmj.m1091
  67. Chen T, Dai Z, Mo P, et al. Clinical Characteristics and Outcomes of Older Patients with Coronavirus Disease 2019 (COVID-19) in Wuhan, China: A Single-Centered, Retrospective Study. *J Gerontol A Biol Sci Med Sci.* 2020;75(9):1788-1795. doi:10.1093/gerona/glaa089
  68. Chen Y, Yang D, Cheng B, et al. Clinical Characteristics and Outcomes of Patients With Diabetes and COVID-19 in Association With Glucose-Lowering Medication. *Diabetes Care.* 2020;43(7):1399-1407. doi:10.2337/dc20-0660
  69. Chen F, Sun W, Sun S, Li Z, Wang Z, Yu L. Clinical characteristics and risk factors for mortality among inpatients with COVID-19 in Wuhan, China. *Clin Transl Med.* 2020;10(2):e40. doi:10.1002/ctm2.40
  70. Chen L, Yu J, He W, et al. Risk factors for death in 1859 subjects with COVID-19. *Leukemia.* 2020;34(8):2173-2183. doi:10.1038/s41375-020-0911-0
  71. Chen S, Zhang D, Zheng T, Yu Y, Jiang J. DVT incidence and risk factors in critically ill patients with COVID-19. *J Thromb Thrombolysis.* 2021;51(1):33-39. doi:10.1007/s11239-020-02181-w
  72. Chen L, Long X, Xu Q, et al. Elevated serum levels of S100A8/A9 and HMGB1 at hospital admission are correlated with inferior clinical outcomes in COVID-19 patients. *Cell Mol Immunol.* 2020;17(9):992-994. doi:10.1038/s41423-020-0492-x
  73. Chen J, Bai H, Liu J, et al. Distinct Clinical Characteristics and Risk Factors for Mortality in Female Inpatients With Coronavirus Disease 2019 (COVID-19): A Sex-stratified, Large-scale Cohort Study in Wuhan, China. *Clin Infect Dis.* 2020;71(12):3188-3195. doi:10.1093/cid/ciaa920
  74. Cheng Y, Luo R, Wang K, et al. Kidney disease is associated with in-hospital death of patients with COVID-19. *Kidney Int.* 2020;97(5):829-838. doi:10.1016/j.kint.2020.03.005
  75. Chhiba KD, Patel GB, Vu THT, et al. Prevalence and characterization of asthma in hospitalized and nonhospitalized patients with COVID-19. *J Allergy Clin Immunol.* 2020;146(2):307-314. doi:10.1016/j.jaci.2020.06.010
  76. Cholankeril G, Podboy A, Aivaliotis VI, et al. Association of Digestive Symptoms and Hospitalization in Patients With SARS-CoV-2 Infection. *Am J Gastroenterol.* 2020;115(7):1129-1132. doi:10.14309/ajg.0000000000000712
  77. Chougar L, Shor N, Weiss N, et al. Retrospective Observational Study of Brain MRI Findings in Patients with Acute SARS-CoV-2 Infection and Neurologic Manifestations. *Radiology.* 2020;297(3):E313-E323. doi:10.1148/radiol.2020202422

78. Chung SM, Lee YY, Ha E, et al. The Risk of Diabetes on Clinical Outcomes in Patients with Coronavirus Disease 2019: A Retrospective Cohort Study. *Diabetes Metab J.* 2020;44(3):405-413. doi:10.4093/dmj.2020.0105
79. Ciceri F, Castagna A, Rovere-Querini P, et al. Early predictors of clinical outcomes of COVID-19 outbreak in Milan, Italy. *Clin Immunol.* 2020;217:108509. doi:10.1016/j.clim.2020.108509
80. Colombi D, Bodini FC, Petrini M, et al. Well-aerated Lung on Admitting Chest CT to Predict Adverse Outcome in COVID-19 Pneumonia. *Radiology.* 2020:201433. doi:10.1148/radiol.2020201433
81. Conversano A, Melillo F, Napolano A, et al. Renin-Angiotensin-Aldosterone System Inhibitors and Outcome in Patients With SARS-CoV-2 Pneumonia: A Case Series Study. *Hypertens (Dallas, Tex 1979).* 2020;76(2):e10-e12. doi:10.1161/HYPERTENSIONAHA.120.15312
82. Covino M, De Matteis G, Santoro M, et al. Clinical characteristics and prognostic factors in COVID-19 patients aged  $\geq 80$  years. *Geriatr Gerontol Int.* 2020;20(7):704-708. doi:10.1111/ggi.13960
83. Criel M, Falter M, Jaeken J, et al. Venous thromboembolism in SARS-CoV-2 patients: only a problem in ventilated ICU patients, or is there more to it? *Eur Respir J.* 2020;56(1):2001201. doi:10.1183/13993003.01201-2020
84. d'Alessandro M, Cameli P, Refini RM, et al. Serum KL-6 concentrations as a novel biomarker of severe COVID-19. *J Med Virol.* 2020;92(10):2216-2220. doi:10.1002/jmv.26087
85. Davies P, Evans C, Kanthimathinathan HK, et al. Intensive care admissions of children with paediatric inflammatory multisystem syndrome temporally associated with SARS-CoV-2 (PIMS-TS) in the UK: a multicentre observational study. *Lancet Child Adolesc Heal.* 2020;4(9):669-677. doi:10.1016/S2352-4642(20)30215-7
86. De Smet R, Mellaerts B, Vandewinckele H, et al. Frailty and Mortality in Hospitalized Older Adults With COVID-19: Retrospective Observational Study. *J Am Med Dir Assoc.* 2020;21(7):928-932. doi:10.1016/j.jamda.2020.06.008
87. Deiana G, Azara A, Dettori M, et al. Deaths in SARS-Cov-2 Positive Patients in Italy: The Influence of Underlying Health Conditions on Lethality. *Int J Environ Res Public Health.* 2020;17(12):4450. doi:10.3390/ijerph17124450
88. Del Amo J, Polo R, Moreno S, et al. Incidence and Severity of COVID-19 in HIV-Positive Persons Receiving Antiretroviral Therapy : A Cohort Study. *Ann Intern Med.* 2020;173(7):536-541. doi:10.7326/M20-3689
89. Della-Torre E, Campochiaro C, Cavalli G, et al. Interleukin-6 blockade with sarilumab in severe COVID-19 pneumonia with systemic hyperinflammation: an open-label cohort study. *Ann Rheum Dis.* 2020;79(10):1277-1285. doi:10.1136/annrheumdis-2020-218122
90. Demelo-Rodríguez P, Cervilla-Muñoz E, Ordieres-Ortega L, et al. Incidence of asymptomatic deep vein thrombosis in patients with COVID-19 pneumonia

- and elevated D-dimer levels. *Thromb Res.* 2020;192:23-26. doi:10.1016/j.thromres.2020.05.018
91. Deng Q, Hu B, Zhang Y, et al. Suspected myocardial injury in patients with COVID-19: Evidence from front-line clinical observation in Wuhan, China. *Int J Cardiol.* 2020;311:116-121. doi:10.1016/j.ijcard.2020.03.087
  92. Deng G, Yin M, Chen X, Zeng F. Clinical determinants for fatality of 44,672 patients with COVID-19. *Crit Care.* 2020;24(1):179. doi:10.1186/s13054-020-02902-w
  93. Deng P, Ke Z, Ying B, Qiao B, Yuan L. The diagnostic and prognostic role of myocardial injury biomarkers in hospitalized patients with COVID-19. *Clin Chim Acta.* 2020;510:186-190. doi:10.1016/j.cca.2020.07.018
  94. Denova-Gutiérrez E, Lopez-Gatell H, Alomia-Zegarra JL, et al. The Association of Obesity, Type 2 Diabetes, and Hypertension with Severe Coronavirus Disease 2019 on Admission Among Mexican Patients. *Obesity (Silver Spring).* 2020;28(10):1826-1832. doi:10.1002/oby.22946
  95. Desborough MJR, Doyle AJ, Griffiths A, Retter A, Breen KA, Hunt BJ. Image-proven thromboembolism in patients with severe COVID-19 in a tertiary critical care unit in the United Kingdom. *Thromb Res.* 2020;193:1-4. doi:10.1016/j.thromres.2020.05.049
  96. Di Bella S, Cesareo R, De Cristofaro P, et al. Neck circumference as reliable predictor of mechanical ventilation support in adult inpatients with COVID-19: A multicentric prospective evaluation. *Diabetes Metab Res Rev.* 2021;37(1):e3354. doi:10.1002/dmrr.3354
  97. Ding T, Zhang J, Wang T, et al. Potential Influence of Menstrual Status and Sex Hormones on female SARS-CoV-2 Infection: A Cross-sectional Study from Multicentre in Wuhan, China. *Clin Infect Dis.* July 2020. doi:10.1093/cid/ciaa1022
  98. Docherty AB, Harrison EM, Green CA, et al. Features of 20 133 UK patients in hospital with covid-19 using the ISARIC WHO Clinical Characterisation Protocol: prospective observational cohort study. *BMJ.* 2020;369:m1985. doi:10.1136/bmj.m1985
  99. Dreher M, Kersten A, Bickenbach J, et al. The Characteristics of 50 Hospitalized COVID-19 Patients With and Without ARDS. *Dtsch Arztebl Int.* 2020;117(16):271-278. doi:10.3238/arztebl.2020.0271
  100. D'Silva KM, Serling-Boyd N, Wallwork R, et al. Clinical characteristics and outcomes of patients with coronavirus disease 2019 (COVID-19) and rheumatic disease: a comparative cohort study from a US "hot spot". *Ann Rheum Dis.* 2020;79(9):1156-1162. doi:10.1136/annrheumdis-2020-217888
  101. Du R-H, Liu L-M, Yin W, et al. Hospitalization and Critical Care of 109 Decedents with COVID-19 Pneumonia in Wuhan, China. *Ann Am Thorac Soc.* April 2020. doi:10.1513/AnnalsATS.202003-225OC
  102. Du R-H, Liang L-R, Yang C-Q, et al. Predictors of Mortality for Patients with COVID-19 Pneumonia Caused by SARS-CoV-2: A Prospective Cohort Study.

103. Duanmu Y, Brown IP, Gibb WR, et al. Characteristics of Emergency Department Patients With COVID-19 at a Single Site in Northern California: Clinical Observations and Public Health Implications. *Acad Emerg Med.* 2020;27(6):505-509. doi:10.1111/acem.14003
104. Dudoignon E, Moreno N, Deniau B, et al. Activation of the renin-angiotensin-aldosterone system is associated with Acute Kidney Injury in COVID-19. *Anaesthesia, Crit care pain Med.* 2020;39(4):453-455. doi:10.1016/j.accpm.2020.06.006
105. Dufour I, Raedemaeker J, Andreozzi F, et al. COVID-19, impact on myeloma patients. *Ann Hematol.* 2020;99(8):1947-1949. doi:10.1007/s00277-020-04147-7
106. Ebinger JE, Achamallah N, Ji H, et al. Pre-existing traits associated with Covid-19 illness severity. *PLoS One.* 2020;15(7):e0236240. doi:10.1371/journal.pone.0236240
107. Escalera-Antezana JP, Lizon-Ferruffino NF, Maldonado-Alanoca A, et al. Risk factors for mortality in patients with Coronavirus Disease 2019 (COVID-19) in Bolivia: An analysis of the first 107 confirmed cases. *Le Infez Med.* 2020;28(2):238-242. <http://www.ncbi.nlm.nih.gov/pubmed/32487789>.
108. Fang C, Garzillo G, Batohi B, et al. Extent of pulmonary thromboembolic disease in patients with COVID-19 on CT: relationship with pulmonary parenchymal disease. *Clin Radiol.* 2020;75(10):780-788. doi:10.1016/j.crad.2020.07.002
109. Fauvel C, Weizman O, Trimaille A, et al. Pulmonary embolism in COVID-19 patients: a French multicentre cohort study. *Eur Heart J.* 2020;41(32):3058-3068. doi:10.1093/eurheartj/ehaa500
110. Felice C, Nardin C, Di Tanna GL, et al. Use of RAAS Inhibitors and Risk of Clinical Deterioration in COVID-19: Results From an Italian Cohort of 133 Hypertensives. *Am J Hypertens.* 2020;33(10):944-948. doi:10.1093/ajh/hpaa096
111. Deng X, Yang J, Wang W, et al. Case fatality risk of the first pandemic wave of novel coronavirus disease 2019 (COVID-19) in China. *Clin Infect Dis.* May 2020. doi:10.1093/cid/ciaa578
112. Ferguson J, Rosser JI, Quintero O, et al. Characteristics and Outcomes of Coronavirus Disease Patients under Nonsurge Conditions, Northern California, USA, March-April 2020. *Emerg Infect Dis.* 2020;26(8):1679-1685. doi:10.3201/eid2608.201776
113. Ferm S, Fisher C, Pakala T, et al. Analysis of Gastrointestinal and Hepatic Manifestations of SARS-CoV-2 Infection in 892 Patients in Queens, NY. *Clin Gastroenterol Hepatol.* 2020;18(10):2378-2379. doi:10.1016/j.cgh.2020.05.049
114. Fernández-Cruz A, Ruiz-Antorán B, Muñoz-Gómez A, et al. A Retrospective Controlled Cohort Study of the Impact of Glucocorticoid Treatment in SARS-

- CoV-2 Infection Mortality. *Antimicrob Agents Chemother.* 2020;64(9). doi:10.1128/AAC.01168-20
115. Ferrante G, Fazzari F, Cozzi O, et al. Risk factors for myocardial injury and death in patients with COVID-19: insights from a cohort study with chest computed tomography. *Cardiovasc Res.* 2020;116(14):2239-2246. doi:10.1093/cvr/cvaa193
  116. Fisher M, Neugarten J, Bellin E, et al. AKI in Hospitalized Patients with and without COVID-19: A Comparison Study. *J Am Soc Nephrol.* 2020;31(9):2145-2157. doi:10.1681/ASN.2020040509
  117. Fogarty H, Townsend L, Ni Cheallaigh C, et al. COVID19 coagulopathy in Caucasian patients. *Br J Haematol.* 2020;189(6):1044-1049. doi:10.1111/bjh.16749
  118. Fominskiy E V, Scandroglio AM, Monti G, et al. Prevalence, Characteristics, Risk Factors, and Outcomes of Invasively Ventilated COVID-19 Patients with Acute Kidney Injury and Renal Replacement Therapy. *Blood Purif.* 2021;50(1):102-109. doi:10.1159/000508657
  119. Fosbøl EL, Butt JH, Østergaard L, et al. Association of Angiotensin-Converting Enzyme Inhibitor or Angiotensin Receptor Blocker Use With COVID-19 Diagnosis and Mortality. *JAMA.* 2020;324(2):168-177. doi:10.1001/jama.2020.11301
  120. Foster CE, Moulton EA, Munoz FM, et al. Coronavirus Disease 2019 in Children Cared for at Texas Children's Hospital: Initial Clinical Characteristics and Outcomes. *J Pediatric Infect Dis Soc.* 2020;9(3):373-377. doi:10.1093/jpids/piaa072
  121. Fox TA, Troy-Barnes E, Kirkwood AA, et al. Clinical outcomes and risk factors for severe COVID-19 in patients with haematological disorders receiving chemo- or immunotherapy. *Br J Haematol.* 2020;191(2):194-206. doi:10.1111/bjh.17027
  122. Francone M, Iafrate F, Masci GM, et al. Chest CT score in COVID-19 patients: correlation with disease severity and short-term prognosis. *Eur Radiol.* 2020;30(12):6808-6817. doi:10.1007/s00330-020-07033-y
  123. Göttinger F, Santiago-García B, Noguera-Julián A, et al. COVID-19 in children and adolescents in Europe: a multinational, multicentre cohort study. *Lancet Child Adolesc Heal.* 2020;4(9):653-661. doi:10.1016/S2352-4642(20)30177-2
  124. Gallo O, Locatello LG, Orlando P, et al. Cancer population may be paradoxically protected from severe manifestations of COVID-19. *J Infect.* 2020;81(2):e156-e158. doi:10.1016/j.jinf.2020.06.011
  125. Gao L, Jiang D, Wen X-S, et al. Prognostic value of NT-proBNP in patients with severe COVID-19. *Respir Res.* 2020;21(1):83. doi:10.1186/s12931-020-01352-w
  126. Gao C, Cai Y, Zhang K, et al. Association of hypertension and antihypertensive treatment with COVID-19 mortality: a retrospective observational study. *Eur*

- Heart J.* 2020;41(22):2058-2066. doi:10.1093/eurheartj/ehaa433
127. Gao S, Jiang F, Jin W, et al. Risk factors influencing the prognosis of elderly patients infected with COVID-19: a clinical retrospective study in Wuhan, China. *Aging (Albany NY)*. 2020;12(13):12504-12516. doi:10.18632/aging.103631
  128. Garcia-Pachon E, Zamora-Molina L, Soler-Sempere MJ, et al. Asthma prevalence in patients with SARS-CoV-2 infection detected by RT-PCR not requiring hospitalization. *Respir Med*. 2020;171:106084. doi:10.1016/j.rmed.2020.106084
  129. Gavin W, Campbell E, Zaidi S-A, et al. Clinical characteristics, outcomes and prognosticators in adult patients hospitalized with COVID-19. *Am J Infect Control*. 2021;49(2):158-165. doi:10.1016/j.ajic.2020.07.005
  130. Gayam V, Chobufo MD, Merghani MA, Lamichhane S, Garlapati PR, Adler MK. Clinical characteristics and predictors of mortality in African-Americans with COVID-19 from an inner-city community teaching hospital in New York. *J Med Virol*. 2021;93(2):812-819. doi:10.1002/jmv.26306
  131. Gazzaruso C, Carlo Stella N, Mariani G, et al. Impact of anti-rheumatic drugs and steroids on clinical course and prognosis of COVID-19. *Clin Rheumatol*. 2020;39(8):2475-2477. doi:10.1007/s10067-020-05239-5
  132. Gervaise A, Bouzad C, Peroux E, Helissey C. Acute pulmonary embolism in non-hospitalized COVID-19 patients referred to CTPA by emergency department. *Eur Radiol*. 2020;30(11):6170-6177. doi:10.1007/s00330-020-06977-5
  133. Gervasoni C, Meraviglia P, Riva A, et al. Clinical Features and Outcomes of Patients With Human Immunodeficiency Virus With COVID-19. *Clin Infect Dis*. 2020;71(16):2276-2278. doi:10.1093/cid/ciaa579
  134. Giacomelli A, Ridolfo AL, Milazzo L, et al. 30-day mortality in patients hospitalized with COVID-19 during the first wave of the Italian epidemic: A prospective cohort study. *Pharmacol Res*. 2020;158:104931. doi:10.1016/j.phrs.2020.104931
  135. Gidari A, De Socio GV, Sabbatini S, Francisci D. Predictive value of National Early Warning Score 2 (NEWS2) for intensive care unit admission in patients with SARS-CoV-2 infection. *Infect Dis (London, England)*. 2020;52(10):698-704. doi:10.1080/23744235.2020.1784457
  136. Giusti B, Gori AM, Alessi M, et al. Sars-CoV-2 Induced Coagulopathy and Prognosis in Hospitalized Patients: A Snapshot from Italy. *Thromb Haemost*. 2020;120(8):1233-1236. doi:10.1055/s-0040-1712918
  137. Goicoechea M, Sánchez Cámara LA, Macías N, et al. COVID-19: clinical course and outcomes of 36 hemodialysis patients in Spain. *Kidney Int*. 2020;98(1):27-34. doi:10.1016/j.kint.2020.04.031
  138. Gold JAW, Wong KK, Szablewski CM, et al. Characteristics and Clinical Outcomes of Adult Patients Hospitalized with COVID-19 - Georgia, March 2020. *MMWR Morb Mortal Wkly Rep*. 2020;69(18):545-550.

doi:10.15585/mmwr.mm6918e1

139. Golpe R, Blanco N, Castro-Añón O, et al. Factors Associated to Hospital Admission in a Care Protocol in COVID-19. *Arch Bronconeumol*. 2020;56(10):676-677. doi:10.1016/j.arbres.2020.05.038
140. Golpe R, Pérez-de-Llano LA, Dacal D, et al. Risk of severe COVID-19 in hypertensive patients treated with renin-angiotensin-aldosterone system inhibitors. *Med Clin (Barc)*. 2020;155(11):488-490. doi:10.1016/j.medcli.2020.06.013
141. Goshua G, Pine AB, Meizlish ML, et al. Endotheliopathy in COVID-19-associated coagulopathy: evidence from a single-centre, cross-sectional study. *Lancet Haematol*. 2020;7(8):e575-e582. doi:10.1016/S2352-3026(20)30216-7
142. Goyal P, Choi JJ, Pinheiro LC, et al. Clinical Characteristics of Covid-19 in New York City. *N Engl J Med*. April 2020. doi:10.1056/NEJMc2010419
143. Goyal P, Ringel JB, Rajan M, et al. Obesity and COVID-19 in New York City: A Retrospective Cohort Study. *Ann Intern Med*. 2020;173(10):855-858. doi:10.7326/M20-2730
144. Grandmaison G, Andrey A, Périard D, et al. Systematic Screening for Venous Thromboembolic Events in COVID-19 Pneumonia. *TH open companion J to Thromb Haemost*. 2020;4(2):e113-e115. doi:10.1055/s-0040-1713167
145. Grasselli G, Greco M, Zanella A, et al. Risk Factors Associated With Mortality Among Patients With COVID-19 in Intensive Care Units in Lombardy, Italy. *JAMA Intern Med*. 2020;180(10):1345-1355. doi:10.1001/jamainternmed.2020.3539
146. Gregoriano C, Koch D, Haubitz S, et al. Characteristics, predictors and outcomes among 99 patients hospitalised with COVID-19 in a tertiary care centre in Switzerland: an observational analysis. *Swiss Med Wkly*. 2020;150:w20316. doi:10.4414/smw.2020.20316
147. Guan W-J, Ni Z-Y, Hu Y, et al. Clinical Characteristics of Coronavirus Disease 2019 in China. *N Engl J Med*. 2020;382(18):1708-1720. doi:10.1056/NEJMoa2002032
148. Gupta S, Hayek SS, Wang W, et al. Factors Associated With Death in Critically Ill Patients With Coronavirus Disease 2019 in the US. *JAMA Intern Med*. 2020;180(11):1-12. doi:10.1001/jamainternmed.2020.3596
149. Hajifathalian K, Krisko T, Mehta A, et al. Gastrointestinal and Hepatic Manifestations of 2019 Novel Coronavirus Disease in a Large Cohort of Infected Patients From New York: Clinical Implications. *Gastroenterology*. 2020;159(3):1137-1140. doi:10.1053/j.gastro.2020.05.010
150. Hajifathalian K, Kumar S, Newberry C, et al. Obesity is Associated with Worse Outcomes in COVID-19: Analysis of Early Data from New York City. *Obesity (Silver Spring)*. 2020;28(9):1606-1612. doi:10.1002/oby.22923
151. Halasz G, Leoni ML, Villani GQ, Nolli M, Villani M. Obesity, overweight and survival in critically ill patients with SARS-CoV-2 pneumonia: is there an obesity paradox? Preliminary results from Italy. *Eur J Prev Cardiol*. July 2020.

doi:10.1177/2047487320939675

152. Halvatsiotis P, Kotanidou A, Tzannis K, et al. Demographic and clinical features of critically ill patients with COVID-19 in Greece: The burden of diabetes and obesity. *Diabetes Res Clin Pract.* 2020;166:108331. doi:10.1016/j.diabres.2020.108331
153. Harmouch F, Shah K, Hippen JT, Kumar A, Goel H. Is it all in the heart? Myocardial injury as major predictor of mortality among hospitalized COVID-19 patients. *J Med Virol.* 2021;93(2):973-982. doi:10.1002/jmv.26347
154. Hattori T, Amishima M, Morinaga D, et al. Older age is associated with sustained detection of SARS-CoV-2 in nasopharyngeal swab samples. *J Infect.* 2021;82(1):159-198. doi:10.1016/j.jinf.2020.06.046
155. Hengeveld PJ, Khader AO, de Bruin LHA, et al. Blood cell counts and lymphocyte subsets of patients admitted during the COVID-19 pandemic: a prospective cohort study. *Br J Haematol.* 2020;190(4):e201-e204. doi:10.1111/bjh.16983
156. Herold T, Jurinovic V, Arnreich C, et al. Elevated levels of IL-6 and CRP predict the need for mechanical ventilation in COVID-19. *J Allergy Clin Immunol.* 2020;146(1):128-136. doi:10.1016/j.jaci.2020.05.008
157. Hewitt J, Carter B, Vilches-Moraga A, et al. The effect of frailty on survival in patients with COVID-19 (COPE): a multicentre, European, observational cohort study. *Lancet Public Heal.* 2020;5(8):e444-e451. doi:10.1016/S2468-2667(20)30146-8
158. Hippensteel JA, Burnham EL, Jolley SE. Prevalence of venous thromboembolism in critically ill patients with COVID-19. *Br J Haematol.* 2020;190(3):e134-e137. doi:10.1111/bjh.16908
159. Hirsch JS, Ng JH, Ross DW, et al. Acute kidney injury in patients hospitalized with COVID-19. *Kidney Int.* 2020;98(1):209-218. doi:10.1016/j.kint.2020.05.006
160. Holt A, Mizrak I, Lamberts M, Lav Madsen P. Influence of inhibitors of the renin-angiotensin system on risk of acute respiratory distress syndrome in Danish hospitalized COVID-19 patients. *J Hypertens.* 2020;38(8):1612-1613. doi:10.1097/HJH.0000000000002515
161. Hong KS, Lee KH, Chung JH, et al. Clinical Features and Outcomes of 98 Patients Hospitalized with SARS-CoV-2 Infection in Daegu, South Korea: A Brief Descriptive Study. *Yonsei Med J.* 2020;61(5):431-437. doi:10.3349/ymj.2020.61.5.431
162. RECOVERY Collaborative Group, Horby P, Lim WS, et al. Dexamethasone in Hospitalized Patients with Covid-19 - Preliminary Report. *N Engl J Med.* July 2020. doi:10.1056/NEJMoa2021436
163. Hottz ED, Azevedo-Quintanilha IG, Palhinha L, et al. Platelet activation and platelet-monocyte aggregate formation trigger tissue factor expression in patients with severe COVID-19. *Blood.* 2020;136(11):1330-1341. doi:10.1182/blood.2020007252

164. Hsu HE, Ashe EM, Silverstein M, et al. Race/Ethnicity, Underlying Medical Conditions, Homelessness, and Hospitalization Status of Adult Patients with COVID-19 at an Urban Safety-Net Medical Center - Boston, Massachusetts, 2020. *MMWR Morb Mortal Wkly Rep.* 2020;69(27):864-869. doi:10.15585/mmwr.mm6927a3
165. Hu J, Zhang X, Zhang X, et al. COVID-19 is more severe in patients with hypertension; ACEI/ARB treatment does not influence clinical severity and outcome. *J Infect.* 2020;81(6):979-997. doi:10.1016/j.jinf.2020.05.056
166. Huang C, Wang Y, Li X, et al. Clinical features of patients infected with 2019 novel coronavirus in Wuhan, China. *Lancet (London, England).* 2020;395(10223):497-506. doi:10.1016/S0140-6736(20)30183-5
167. Huang J, Cheng A, Kumar R, et al. Hypoalbuminemia predicts the outcome of COVID-19 independent of age and co-morbidity. *J Med Virol.* 2020;92(10):2152-2158. doi:10.1002/jmv.26003
168. Huang Y, Chen Z, Wang Y, et al. Clinical characteristics of 17 patients with COVID-19 and systemic autoimmune diseases: a retrospective study. *Ann Rheum Dis.* 2020;79(9):1163-1169. doi:10.1136/annrheumdis-2020-217425
169. Huang W, Li C, Wang Z, et al. Decreased serum albumin level indicates poor prognosis of COVID-19 patients: hepatic injury analysis from 2,623 hospitalized cases. *Sci China Life Sci.* 2020;63(11):1678-1687. doi:10.1007/s11427-020-1733-4
170. Hur K, Price CPE, Gray EL, et al. Factors Associated With Intubation and Prolonged Intubation in Hospitalized Patients With COVID-19. *Otolaryngol Head Neck Surg.* 2020;163(1):170-178. doi:10.1177/0194599820929640
171. Husain-Syed F, Wilhelm J, Kassoumeh S, et al. Acute kidney injury and urinary biomarkers in hospitalized patients with coronavirus disease-2019. *Nephrol Dial Transplant.* 2020;35(7):1271-1274. doi:10.1093/ndt/gfaa162
172. Hwang J-M, Kim J-H, Park J-S, Chang MC, Park D. Neurological diseases as mortality predictive factors for patients with COVID-19: a retrospective cohort study. *Neurol Sci.* 2020;41(9):2317-2324. doi:10.1007/s10072-020-04541-z
173. Iaccarino G, Grassi G, Borghi C, et al. Age and Multimorbidity Predict Death Among COVID-19 Patients: Results of the SARS-RAS Study of the Italian Society of Hypertension. *Hypertens (Dallas, Tex 1979).* 2020;76(2):366-372. doi:10.1161/HYPERTENSIONAHA.120.15324
174. Imam Z, Odish F, Gill I, et al. Older age and comorbidity are independent mortality predictors in a large cohort of 1305 COVID-19 patients in Michigan, United States. *J Intern Med.* 2020;288(4):469-476. doi:10.1111/joim.13119
175. Imam Z, Odish F, Armstrong J, et al. Independent Correlates of Hospitalization in 2040 Patients with COVID-19 at a Large Hospital System in Michigan, United States. *J Gen Intern Med.* 2020;35(8):2516-2517. doi:10.1007/s11606-020-05937-5
176. Inciardi RM, Adamo M, Lupi L, et al. Characteristics and outcomes of patients hospitalized for COVID-19 and cardiac disease in Northern Italy. *Eur Heart J.*

- 2020;41(19):1821-1829. doi:10.1093/eurheartj/ehaa388
177. Israelsen SB, Kristiansen KT, Hindsberger B, et al. Characteristics of patients with COVID-19 pneumonia at Hvidovre Hospital, March–April 2020. *Dan Med J*. 2020;67(6):A05200313. <http://www.ncbi.nlm.nih.gov/pubmed/32448405>.
  178. Izquierdo-Domínguez A, Rojas-Lechuga MJ, Chiesa-Estomba C, et al. Smell and Taste Dysfunction in COVID-19 Is Associated With Younger Age in Ambulatory Settings: A Multicenter Cross-Sectional Study. *J Investig Allergol Clin Immunol*. 2020;30(5):346-357. doi:10.18176/jiaci.0595
  179. Jalili M, Payandemehr P, Saghaei A, Sari HN, Safikhani H, Kolivand P. Characteristics and Mortality of Hospitalized Patients With COVID-19 in Iran: A National Retrospective Cohort Study. *Ann Intern Med*. 2021;174(1):125-127. doi:10.7326/M20-2911
  180. Jang JG, Hur J, Hong KS, Lee W, Ahn JH. Prognostic Accuracy of the SIRS, qSOFA, and NEWS for Early Detection of Clinical Deterioration in SARS-CoV-2 Infected Patients. *J Korean Med Sci*. 2020;35(25):e234. doi:10.3346/jkms.2020.35.e234
  181. Javanian M, Bayani M, Shokri M, et al. Clinical and laboratory findings from patients with COVID-19 pneumonia in Babol North of Iran: a retrospective cohort study. *Rom J Intern Med*. 2020;58(3):161-167. doi:10.2478/rjim-2020-0013
  182. Jiang H, Guo W, Shi Z, et al. Clinical imaging characteristics of inpatients with coronavirus disease-2019 in Heilongjiang Province, China: a retrospective study. *Aging (Albany NY)*. 2020;12(14):13860-13868. doi:10.18632/aging.103633
  183. Jordan SC, Zakowski P, Tran HP, et al. Compassionate Use of Tocilizumab for Treatment of SARS-CoV-2 Pneumonia. *Clin Infect Dis*. 2020;71(12):3168-3173. doi:10.1093/cid/ciaa812
  184. Jung S-Y, Choi JC, You S-H, Kim W-Y. Association of Renin-angiotensin-aldosterone System Inhibitors With Coronavirus Disease 2019 (COVID-19)-Related Outcomes in Korea: A Nationwide Population-based Cohort Study. *Clin Infect Dis*. 2020;71(16):2121-2128. doi:10.1093/cid/ciaa624
  185. Kalan ME, Ghobadi H, Taleb Z Ben, et al. Descriptive characteristics of hospitalized adult smokers and never-smokers with COVID-19. *Tob Induc Dis*. 2020;18:46. doi:10.18332/tid/122759
  186. Kalligeros M, Shehadeh F, Mylona EK, et al. Association of Obesity with Disease Severity Among Patients with Coronavirus Disease 2019. *Obesity (Silver Spring)*. 2020;28(7):1200-1204. doi:10.1002/oby.22859
  187. Karmen-Tuohy S, Carlucci PM, Zervou FN, et al. Outcomes Among HIV-Positive Patients Hospitalized With COVID-19. *J Acquir Immune Defic Syndr*. 2020;85(1):6-10. doi:10.1097/QAI.0000000000002423
  188. Kayem G, Lecarpentier E, Deruelle P, et al. A snapshot of the Covid-19 pandemic among pregnant women in France. *J Gynecol Obstet Hum Reprod*. 2020;49(7):101826. doi:10.1016/j.jogoh.2020.101826

189. Kebisek J, Forrest LJ, Maule AL, Steelman RA, Ambrose JF. Special report: Prevalence of selected underlying health conditions among active component Army service members with coronavirus disease 2019, 11 February-6 April 2020. *MSSMR*. 2020;27(5):50-54.  
<http://www.ncbi.nlm.nih.gov/pubmed/32479103>.
190. Khalil K, Agbontaen K, McNally D, et al. Clinical characteristics and 28-day mortality of medical patients admitted with COVID-19 to a central London teaching hospital. *J Infect*. 2020;81(3):e85-e89. doi:10.1016/j.jinf.2020.06.027
191. Khamis F, Al-Zakwani I, Al Naamani H, et al. Clinical characteristics and outcomes of the first 63 adult patients hospitalized with COVID-19: An experience from Oman. *J Infect Public Health*. 2020;13(7):906-913. doi:10.1016/j.jiph.2020.06.002
192. Khamis F, Al Rashidi B, Al-Zakwani I, Al Wahaibi AH, Al Awaidy ST. Epidemiology of COVID-19 Infection in Oman: Analysis of the First 1304 Cases. *Oman Med J*. 2020;35(3):e145. doi:10.5001/omj.2020.60
193. Killerby ME, Link-Gelles R, Haight SC, et al. Characteristics Associated with Hospitalization Among Patients with COVID-19 - Metropolitan Atlanta, Georgia, March-April 2020. *MMWR Morb Mortal Wkly Rep*. 2020;69(25):790-794. doi:10.15585/mmwr.mm6925e1
194. Kim DW, Byeon KH, Kim J, Cho KD, Lee N. The Correlation of Comorbidities on the Mortality in Patients with COVID-19: an Observational Study Based on the Korean National Health Insurance Big Data. *J Korean Med Sci*. 2020;35(26):e243. doi:10.3346/jkms.2020.35.e243
195. Kim L, Garg S, O'Halloran A, et al. Risk Factors for Intensive Care Unit Admission and In-hospital Mortality among Hospitalized Adults Identified through the U.S. Coronavirus Disease 2019 (COVID-19)-Associated Hospitalization Surveillance Network (COVID-NET). *Clin Infect Dis*. July 2020. doi:10.1093/cid/ciaa1012
196. King MJ, Lewis S, El Homsy M, et al. Lung base CT findings in COVID-19 adult patients presenting with acute abdominal complaints: case series from a major New York City health system. *Eur Radiol*. 2020;30(12):6685-6693. doi:10.1007/s00330-020-07040-z
197. Klang E, Kassim G, Soffer S, Freeman R, Levin MA, Reich DL. Severe Obesity as an Independent Risk Factor for COVID-19 Mortality in Hospitalized Patients Younger than 50. *Obesity (Silver Spring)*. 2020;28(9):1595-1599. doi:10.1002/oby.22913
198. Klok FA, Kruip MJHA, van der Meer NJM, et al. Confirmation of the high cumulative incidence of thrombotic complications in critically ill ICU patients with COVID-19: An updated analysis. *Thromb Res*. 2020;191:148-150. doi:10.1016/j.thromres.2020.04.041
199. Knights H, Mayor N, Millar K, et al. Characteristics and outcomes of patients with COVID-19 at a district general hospital in Surrey, UK. *Clin Med*. 2020;20(5):e148-e153. doi:10.7861/clinmed.2020-0303
200. Knorr JP, Colomy V, Mauriello CM, Ha S. Tocilizumab in patients with severe

- COVID-19: A single-center observational analysis. *J Med Virol.* 2020;92(11):2813-2820. doi:10.1002/jmv.26191
201. Koleilat I, Galen B, Choinski K, et al. Clinical characteristics of acute lower extremity deep venous thrombosis diagnosed by duplex in patients hospitalized for coronavirus disease 2019. *J Vasc surgery Venous Lymphat Disord.* 2021;9(1):36-46. doi:10.1016/j.jvsv.2020.06.012
  202. Korkmaz MF, Türe E, Dorum BA, Kılıç ZB. The Epidemiological and Clinical Characteristics of 81 Children with COVID-19 in a Pandemic Hospital in Turkey: an Observational Cohort Study. *J Korean Med Sci.* 2020;35(25):e236. doi:10.3346/jkms.2020.35.e236
  203. Kormann R, Jacquot A, Alla A, et al. Coronavirus disease 2019: acute Fanconi syndrome precedes acute kidney injury. *Clin Kidney J.* 2020;13(3):362-370. doi:10.1093/ckj/sfaa109
  204. Kragholm K, Andersen MP, Gerds TA, et al. Association between male sex and outcomes of Coronavirus Disease 2019 (Covid-19) - a Danish nationwide, register-based study. *Clin Infect Dis.* July 2020. doi:10.1093/cid/ciaa924
  205. Krishnan S, Patel K, Desai R, et al. Clinical comorbidities, characteristics, and outcomes of mechanically ventilated patients in the State of Michigan with SARS-CoV-2 pneumonia. *J Clin Anesth.* 2020;67:110005. doi:10.1016/j.jclinane.2020.110005
  206. Kuno T, Takahashi M, Obata R, Maeda T. Cardiovascular comorbidities, cardiac injury, and prognosis of COVID-19 in New York City. *Am Heart J.* 2020;226:24-25. doi:10.1016/j.ahj.2020.05.005
  207. Lagadinou M, Salomou EE, Zareifopoulos N, Marangos M, Gogos C, Velissaris D. Prognosis of COVID-19: Changes in laboratory parameters. *Le Infez Med.* 2020;28(suppl 1):89-95. <http://www.ncbi.nlm.nih.gov/pubmed/32532944>.
  208. Lagi F, Piccica M, Graziani L, et al. Early experience of an infectious and tropical diseases unit during the coronavirus disease (COVID-19) pandemic, Florence, Italy, February to March 2020. *Euro Surveill.* 2020;25(17):2000556. doi:10.2807/1560-7917.ES.2020.25.17.2000556
  209. Larsen K, Coolen-Allou N, Masse L, et al. Detection of Pulmonary Embolism in Returning Travelers with Hypoxemic Pneumonia due to COVID-19 in Reunion Island. *Am J Trop Med Hyg.* 2020;103(2):844-846. doi:10.4269/ajtmh.20-0597
  210. Larson DT, Sherner JH, Gallagher KM, et al. Clinical Outcomes of COVID-19 with Evidence-Based Supportive Care. *Clin Infect Dis.* May 2020. doi:10.1093/cid/ciaa678
  211. Lee LY, Cazier J-B, Angelis V, et al. COVID-19 mortality in patients with cancer on chemotherapy or other anticancer treatments: a prospective cohort study. *Lancet (London, England).* 2020;395(10241):1919-1926. doi:10.1016/S0140-6736(20)31173-9
  212. Lee JY, Kim HA, Huh K, et al. Risk Factors for Mortality and Respiratory

- Support in Elderly Patients Hospitalized with COVID-19 in Korea. *J Korean Med Sci.* 2020;35(23):e223. doi:10.3346/jkms.2020.35.e223
213. Lee Y-H, Hong CM, Kim DH, Lee TH, Lee J. Clinical Course of Asymptomatic and Mildly Symptomatic Patients with Coronavirus Disease Admitted to Community Treatment Centers, South Korea. *Emerg Infect Dis.* 2020;26(10):2346-2352. doi:10.3201/eid2610.201620
214. Lee PY, Day-Lewis M, Henderson LA, et al. Distinct clinical and immunological features of SARS-CoV-2-induced multisystem inflammatory syndrome in children. *J Clin Invest.* 2020;130(11):5942-5950. doi:10.1172/JCI141113
215. Li J, Wang X, Chen J, Zhang H, Deng A. Association of Renin-Angiotensin System Inhibitors With Severity or Risk of Death in Patients With Hypertension Hospitalized for Coronavirus Disease 2019 (COVID-19) Infection in Wuhan, China. *JAMA Cardiol.* 2020;5(7):825-830. doi:10.1001/jamacardio.2020.1624
216. Li P, Chen L, Liu Z, et al. Clinical features and short-term outcomes of elderly patients with COVID-19. *Int J Infect Dis.* 2020;97:245-250. doi:10.1016/j.ijid.2020.05.107
217. Li J, Gong X, Wang Z, et al. Clinical features of familial clustering in patients infected with 2019 novel coronavirus in Wuhan, China. *Virus Res.* 2020;286:198043. doi:10.1016/j.virusres.2020.198043
218. Li K, Chen D, Chen S, et al. Predictors of fatality including radiographic findings in adults with COVID-19. *Respir Res.* 2020;21(1):146. doi:10.1186/s12931-020-01411-2
219. Li Y, Han X, Alwalid O, et al. Baseline characteristics and risk factors for short-term outcomes in 132 COVID-19 patients with diabetes in Wuhan China: A retrospective study. *Diabetes Res Clin Pract.* 2020;166:108299. doi:10.1016/j.diabres.2020.108299
220. Li J, Xu G, Yu H, Peng X, Luo Y, Cao C. Clinical Characteristics and Outcomes of 74 Patients With Severe or Critical COVID-19. *Am J Med Sci.* 2020;360(3):229-235. doi:10.1016/j.amjms.2020.05.040
221. Li Q, Chen L, Li Q, et al. Cancer increases risk of in-hospital death from COVID-19 in persons <65 years and those not in complete remission. *Leukemia.* 2020;34(9):2384-2391. doi:10.1038/s41375-020-0986-7
222. Liabeuf S, Moragny J, Bennis Y, et al. Association between renin-angiotensin system inhibitors and COVID-19 complications. *Eur Hear journal Cardiovasc Pharmacother.* June 2020. doi:10.1093/ehjcvp/pvaa062
223. Lim J-H, Park S-H, Jeon Y, et al. Fatal Outcomes of COVID-19 in Patients with Severe Acute Kidney Injury. *J Clin Med.* 2020;9(6):1718. doi:10.3390/jcm9061718
224. Lin W, Xie Z, Li Y, et al. Association between detectable SARS-COV-2 RNA in anal swabs and disease severity in patients with coronavirus disease 2019. *J Med Virol.* 2021;93(2):794-802. doi:10.1002/jmv.26307

225. Liu Y, Du X, Chen J, et al. Neutrophil-to-lymphocyte ratio as an independent risk factor for mortality in hospitalized patients with COVID-19. *J Infect.* 2020;81(1):e6-e12. doi:10.1016/j.jinf.2020.04.002
226. Liu Y, Xiang L, Deng K. Focusing on Gastrointestinal Symptoms in COVID-19 Is Far From Enough. *Gastroenterology.* May 2020. doi:10.1053/j.gastro.2020.05.043
227. Liu J, Dong Y-Q, Yin J, et al. Critically ill patients with COVID-19 with ECMO and artificial liver plasma exchange: A retrospective study. *Medicine (Baltimore).* 2020;99(26):e21012. doi:10.1097/MD.00000000000021012
228. Liu Q, Song NC, Zheng ZK, Li JS, Li SK. Laboratory findings and a combined multifactorial approach to predict death in critically ill patients with COVID-19: a retrospective study. *Epidemiol Infect.* 2020;148:e129. doi:10.1017/S0950268820001442
229. Liu J, Tao L, Liu X, et al. GI symptoms and fever increase the risk of severe illness and death in patients with COVID-19. *Gut.* 2021;70(2):442-444. doi:10.1136/gutjnl-2020-321751
230. Liu L, To KK-W, Chan K-H, et al. High neutralizing antibody titer in intensive care unit patients with COVID-19. *Emerg Microbes Infect.* 2020;9(1):1664-1670. doi:10.1080/22221751.2020.1791738
231. Liu J, Han P, Wu J, Gong J, Tian D. Prevalence and predictive value of hypocalcemia in severe COVID-19 patients. *J Infect Public Health.* 2020;13(9):1224-1228. doi:10.1016/j.jiph.2020.05.029
232. Liu D, Li R, Yu R, et al. Alteration of serum markers in COVID-19 and implications on mortality. *Clin Transl Med.* 2020;10(3):e119. doi:10.1002/ctm2.119
233. Lodigiani C, Iapichino G, Carenzo L, et al. Venous and arterial thromboembolic complications in COVID-19 patients admitted to an academic hospital in Milan, Italy. *Thromb Res.* 2020;191:9-14. doi:10.1016/j.thromres.2020.04.024
234. Loonstra FC, Hoitsma E, van Kempen Z LE, Killestein J, Mostert JP. COVID-19 in multiple sclerosis: The Dutch experience. *Mult Scler.* 2020;26(10):1256-1260. doi:10.1177/1352458520942198
235. López-Otero D, López-Pais J, Cacho-Antonio CE, et al. Impact of angiotensin-converting enzyme inhibitors and angiotensin receptor blockers on COVID-19 in a western population. CARDIOVID registry. *Rev Esp Cardiol (Engl Ed).* 2021;74(2):175-182. doi:10.1016/j.rec.2020.05.018
236. Lorente-Ros A, Monteagudo Ruiz JM, Rincón LM, et al. Myocardial injury determination improves risk stratification and predicts mortality in COVID-19 patients. *Cardiol J.* 2020;27(5):489-496. doi:10.5603/CJ.a2020.0089
237. Louapre C, Collongues N, Stankoff B, et al. Clinical Characteristics and Outcomes in Patients With Coronavirus Disease 2019 and Multiple Sclerosis. *JAMA Neurol.* 2020;77(9):1079-1088. doi:10.1001/jamaneurol.2020.2581
238. Luan Y-Y, Liu Y, Liu X-Y, et al. Coronavirus disease 2019 (COVID-19)

- associated coagulopathy and its impact on outcomes in Shenzhen, China: A retrospective cohort study. *Thromb Res.* 2020;195:62-68. doi:10.1016/j.thromres.2020.07.015
239. Lubetzky M, Aull MJ, Craig-Schapiro R, et al. Kidney allograft recipients, immunosuppression, and coronavirus disease-2019: a report of consecutive cases from a New York City transplant center. *Nephrol Dial Transplant.* 2020;35(7):1250-1261. doi:10.1093/ndt/gfaa154
240. Lumbreras-Marquez MI, Campos-Zamora M, Lizaola-Diaz de Leon H, Farber MK. Maternal mortality from COVID-19 in Mexico. *Int J Gynaecol Obstet.* 2020;150(2):266-267. doi:10.1002/ijgo.13250
241. Luo X, Zhou W, Yan X, et al. Prognostic Value of C-Reactive Protein in Patients With Coronavirus 2019. *Clin Infect Dis.* 2020;71(16):2174-2179. doi:10.1093/cid/ciaa641
242. Luo J, Rizvi H, Preeshagul IR, et al. COVID-19 in patients with lung cancer. *Ann Oncol Off J Eur Soc Med Oncol.* 2020;31(10):1386-1396. doi:10.1016/j.annonc.2020.06.007
243. Luo Y, Xue Y, Mao L, et al. Prealbumin as a Predictor of Prognosis in Patients With Coronavirus Disease 2019. *Front Med.* 2020;7:374. doi:10.3389/fmed.2020.00374
244. Lynch KL, Whitman JD, Lacanienta NP, et al. Magnitude and kinetics of anti-SARS-CoV-2 antibody responses and their relationship to disease severity. *Clin Infect Dis.* July 2020. doi:10.1093/cid/ciaa979
245. Ma A, Cheng J, Yang J, Dong M, Liao X, Kang Y. Neutrophil-to-lymphocyte ratio as a predictive biomarker for moderate-severe ARDS in severe COVID-19 patients. *Crit Care.* 2020;24(1):288. doi:10.1186/s13054-020-03007-0
246. Maatman TK, Jalali F, Feizpour C, et al. Routine Venous Thromboembolism Prophylaxis May Be Inadequate in the Hypercoagulable State of Severe Coronavirus Disease 2019. *Crit Care Med.* 2020;48(9):e783-e790. doi:10.1097/CCM.0000000000004466
247. Macera M, De Angelis G, Sagnelli C, Coppola N, Vanvitelli Covid-Group. Clinical Presentation of COVID-19: Case Series and Review of the Literature. *Int J Environ Res Public Health.* 2020;17(14):5062. doi:10.3390/ijerph17145062
248. Mahdavinia M, Foster KJ, Jauregui E, et al. Asthma prolongs intubation in COVID-19. *J Allergy Clin Immunol Pract.* 2020;8(7):2388-2391. doi:10.1016/j.jaip.2020.05.006
249. Malberti F, Pecchini P, Marchi G, Foramitti M. When a nephrology ward becomes a COVID-19 ward: the Cremona experience. *J Nephrol.* 2020;33(4):625-628. doi:10.1007/s40620-020-00743-y
250. Mani VR, Kalabin A, Valdivieso SC, Murray-Ramcharan M, Donaldson B. New York Inner City Hospital COVID-19 Experience and Current Data: Retrospective Analysis at the Epicenter of the American Coronavirus Outbreak. *J Med Internet Res.* 2020;22(9):e20548. doi:10.2196/20548

251. Mannheim J, Gretsch S, Layden JE, Fricchione MJ. Characteristics of Hospitalized Pediatric Coronavirus Disease 2019 Cases in Chicago, Illinois, March–April 2020. *J Pediatric Infect Dis Soc.* 2020;9(5):519-522. doi:10.1093/jpids/piaa070
252. Maquet J, Lafaurie M, Sommet A, Moulis G. Thrombocytopenia is independently associated with poor outcome in patients hospitalized for COVID-19. *Br J Haematol.* 2020;190(5):e276-e279. doi:10.1111/bjh.16950
253. Martín-Moro F, Marquet J, Piris M, et al. Survival study of hospitalised patients with concurrent COVID-19 and haematological malignancies. *Br J Haematol.* 2020;190(1):e16-e20. doi:10.1111/bjh.16801
254. Martín-Sánchez FJ, Del Toro E, Cardassay E, et al. Clinical presentation and outcome across age categories among patients with COVID-19 admitted to a Spanish Emergency Department. *Eur Geriatr Med.* 2020;11(5):829-841. doi:10.1007/s41999-020-00359-2
255. Marta-Enguita J, Corroza-Laviñeta J, Ostolaza A. Risk factors and severity predictors in COVID-19 hospitalized patients: Analysis of 52 patients. *Med Clin (Barc).* 2020;155(8):360-361. doi:10.1016/j.medcli.2020.06.012
256. Marzolini C, Stader F, Stoeckle M, et al. Effect of Systemic Inflammatory Response to SARS-CoV-2 on Lopinavir and Hydroxychloroquine Plasma Concentrations. *Antimicrob Agents Chemother.* 2020;64(9):e01177-20. doi:10.1128/AAC.01177-20
257. Masetti C, Generali E, Colapietro F, et al. High mortality in COVID-19 patients with mild respiratory disease. *Eur J Clin Invest.* 2020;50(9):e13314. doi:10.1111/eci.13314
258. McCullough SA, Goyal P, Krishnan U, Choi JJ, Safford MM, Okin PM. Electrocardiographic Findings in Coronavirus Disease-19: Insights on Mortality and Underlying Myocardial Processes. *J Card Fail.* 2020;26(7):626-632. doi:10.1016/j.cardfail.2020.06.005
259. Medetalibeyoğlu A, Şenkal N, Çapar G, Köse M, Tükek T. Characteristics of the initial patients hospitalized for COVID-19: a single-center report. *Turkish J Med Sci.* 2020;50(5):1436-1439. doi:10.3906/sag-2004-98
260. Mendoza M, Garcia-Ruiz I, Maiz N, et al. Pre-eclampsia-like syndrome induced by severe COVID-19: a prospective observational study. *BJOG.* 2020;127(11):1374-1380. doi:10.1111/1471-0528.16339
261. Merzon E, Tworowski D, Gorohovski A, et al. Low plasma 25(OH) vitamin D level is associated with increased risk of COVID-19 infection: an Israeli population-based study. *FEBS J.* 2020;287(17):3693-3702. doi:10.1111/febs.15495
262. Mestre-Gómez B, Lorente-Ramos RM, Rogado J, et al. Incidence of pulmonary embolism in non-critically ill COVID-19 patients. Predicting factors for a challenging diagnosis. *J Thromb Thrombolysis.* 2021;51(1):40-46. doi:10.1007/s11239-020-02190-9
263. Meszaros M, Meunier L, Morquin D, et al. Abnormal liver tests in patients

- hospitalized with Coronavirus disease 2019: Should we worry? *Liver Int.* 2020;40(8):1860-1864. doi:10.1111/liv.14557
264. Middeldorp S, Coppens M, van Haaps TF, et al. Incidence of venous thromboembolism in hospitalized patients with COVID-19. *J Thromb Haemost.* 2020;18(8):1995-2002. doi:10.1111/jth.14888
265. Mikami T, Miyashita H, Yamada T, et al. Risk Factors for Mortality in Patients with COVID-19 in New York City. *J Gen Intern Med.* 2021;36(1):17-26. doi:10.1007/s11606-020-05983-z
266. Mishra V, Burma AD, Das SK, Parivallal MB, Amudhan S, Rao GN. COVID-19-Hospitalized Patients in Karnataka: Survival and Stay Characteristics. *Indian J Public Health.* 2020;64(Supplement):S221-S224. doi:10.4103/ijph.IJPH\_486\_20
267. Miyashita H, Mikami T, Chopra N, et al. Do patients with cancer have a poorer prognosis of COVID-19? An experience in New York City. *Ann Oncol Off J Eur Soc Med Oncol.* 2020;31(8):1088-1089. doi:10.1016/j.annonc.2020.04.006
268. Miyashita S, Yamada T, Mikami T, Miyashita H, Chopra N, Rizk D. Impact of dementia on clinical outcomes in elderly patients with coronavirus 2019 (COVID-19): an experience in New York. *Geriatr Gerontol Int.* 2020;20(7):732-734. doi:10.1111/ggi.13942
269. Moghaddam A, Heller RA, Sun Q, et al. Selenium Deficiency Is Associated with Mortality Risk from COVID-19. *Nutrients.* 2020;12(7):2098. doi:10.3390/nu12072098
270. Montagnani A, Pieralli F, Gnerre P, et al. Diabetes and CoViD-19: Experience from the frontline of Internal Medicine wards in Italy. *Diabetes Res Clin Pract.* 2020;167:108335. doi:10.1016/j.diabres.2020.108335
271. Montastruc F, Romano C, Montastruc J-L, et al. Pharmacological characteristics of patients infected with SARS-Cov-2 admitted to Intensive Care Unit in South of France. *Therapie.* 2020;75(4):381-384. doi:10.1016/j.therap.2020.05.005
272. Montopoli M, Zumerle S, Vettor R, et al. Androgen-deprivation therapies for prostate cancer and risk of infection by SARS-CoV-2: a population-based study (N = 4532). *Ann Oncol Off J Eur Soc Med Oncol.* 2020;31(8):1040-1045. doi:10.1016/j.annonc.2020.04.479
273. Moreno-Pérez O, Andres M, Leon-Ramirez J-M, et al. Experience with tocilizumab in severe COVID-19 pneumonia after 80 days of follow-up: A retrospective cohort study. *J Autoimmun.* 2020;114:102523. doi:10.1016/j.jaut.2020.102523
274. Moriconi D, Masi S, Rebelos E, et al. Obesity prolongs the hospital stay in patients affected by COVID-19, and may impact on SARS-COV-2 shedding. *Obes Res Clin Pract.* 2020;14(3):205-209. doi:10.1016/j.orcp.2020.05.009
275. Morrison AR, Johnson JM, Griebel KM, et al. Clinical characteristics and predictors of survival in adults with coronavirus disease 2019 receiving tocilizumab. *J Autoimmun.* 2020;114:102512. doi:10.1016/j.jaut.2020.102512

276. Myers LC, Parodi SM, Escobar GJ, Liu VX. Characteristics of Hospitalized Adults With COVID-19 in an Integrated Health Care System in California. *JAMA*. 2020;323(21):2195-2198. doi:10.1001/jama.2020.7202
277. Myrstad M, Ihle-Hansen H, Tveita AA, et al. National Early Warning Score 2 (NEWS2) on admission predicts severe disease and in-hospital mortality from Covid-19 - a prospective cohort study. *Scand J Trauma Resusc Emerg Med*. 2020;28(1):66. doi:10.1186/s13049-020-00764-3
278. Nahum J, Morichau-Beauchant T, Daviaud F, et al. Venous Thrombosis Among Critically Ill Patients With Coronavirus Disease 2019 (COVID-19). *JAMA Netw open*. 2020;3(5):e2010478. doi:10.1001/jamanetworkopen.2020.10478
279. Nathwani R, Mukherjee S, Forlano R, et al. Letter: liver disease and COVID-19-not the perfect storm. *Aliment Pharmacol Ther*. 2020;52(3):572-574. doi:10.1111/apt.15872
280. Nie X, Fan L, Mu G, et al. Epidemiological Characteristics and Incubation Period of 7015 Confirmed Cases With Coronavirus Disease 2019 Outside Hubei Province in China. *J Infect Dis*. 2020;222(1):26-33. doi:10.1093/infdis/jiaa211
281. Nie S-F, Yu M, Xie T, et al. Cardiac Troponin I Is an Independent Predictor for Mortality in Hospitalized Patients With COVID-19. *Circulation*. 2020;142(6):608-610. doi:10.1161/CIRCULATIONAHA.120.048789
282. Nikpouraghdam M, Jalali Farahani A, Alishiri G, et al. Epidemiological characteristics of coronavirus disease 2019 (COVID-19) patients in IRAN: A single center study. *J Clin Virol*. 2020;127:104378. doi:10.1016/j.jcv.2020.104378
283. Nobel YR, Phipps M, Zucker J, et al. Gastrointestinal Symptoms and COVID-19: Case-Control Study from the United States. *Gastroenterology*. April 2020. doi:10.1053/j.gastro.2020.04.017
284. Nowak B, Szymański P, Pańkowski I, et al. Clinical characteristics and short-term outcomes of patients with coronavirus disease 2019: a retrospective single-center experience of a designated hospital in Poland. *Polish Arch Intern Med*. 2020;130(5):407-411. doi:10.20452/pamw.15361
285. Nuño L, Novella Navarro M, Bonilla G, et al. Clinical course, severity and mortality in a cohort of patients with COVID-19 with rheumatic diseases. *Ann Rheum Dis*. 2020;79(12):1659-1661. doi:10.1136/annrheumdis-2020-218054
286. Okoh AK, Sossou C, Dangayach NS, et al. Coronavirus disease 19 in minority populations of Newark, New Jersey. *Int J Equity Health*. 2020;19(1):93. doi:10.1186/s12939-020-01208-1
287. Ortiz-Brizuela E, Villanueva-Reza M, González-Lara MF, et al. CLINICAL AND EPIDEMIOLOGICAL CHARACTERISTICS OF PATIENTS DIAGNOSED WITH COVID-19 IN A TERTIARY CARE CENTER IN MEXICO CITY: A PROSPECTIVE COHORT STUDY. *Rev Invest Clin*. 2020;72(3):165-177. doi:10.24875/RIC.20000211

288. Oussalah A, Gleye S, Clerc Urmes I, et al. Long-term ACE Inhibitor/ARB Use Is Associated With Severe Renal Dysfunction and Acute Kidney Injury in Patients With Severe COVID-19: Results From a Referral Center Cohort in the Northeast of France. *Clin Infect Dis*. 2020;71(9):2447-2456. doi:10.1093/cid/ciaa677
289. Paderno A, Schreiber A, Grammatica A, et al. Smell and taste alterations in COVID-19: a cross-sectional analysis of different cohorts. *Int Forum Allergy Rhinol*. 2020;10(8):955-962. doi:10.1002/alr.22610
290. Palaiodimos L, Kokkinidis DG, Li W, et al. Severe obesity, increasing age and male sex are independently associated with worse in-hospital outcomes, and higher in-hospital mortality, in a cohort of patients with COVID-19 in the Bronx, New York. *Metabolism*. 2020;108:154262. doi:10.1016/j.metabol.2020.154262
291. Panagiotou G, Tee SA, Ihsan Y, et al. Low serum 25-hydroxyvitamin D (25[OH]D) levels in patients hospitalized with COVID-19 are associated with greater disease severity. *Clin Endocrinol (Oxf)*. 2020;93(4):508-511. doi:10.1111/cen.14276
292. Panepinto JA, Brandow A, Mucalo L, et al. Coronavirus Disease among Persons with Sickle Cell Disease, United States, March 20-May 21, 2020. *Emerg Infect Dis*. 2020;26(10):2473-2476. doi:10.3201/eid2610.202792
293. Parrotta E, Kister I, Charvet L, et al. COVID-19 outcomes in MS: Observational study of early experience from NYU Multiple Sclerosis Comprehensive Care Center. *Neurol Neuroimmunol neuroinflammation*. 2020;7(5):e835. doi:10.1212/NXI.0000000000000835
294. Patel A, Charani E, Ariyanayagam D, et al. New-onset anosmia and ageusia in adult patients diagnosed with SARS-CoV-2 infection. *Clin Microbiol Infect*. 2020;26(9):1236-1241. doi:10.1016/j.cmi.2020.05.026
295. Patell R, Bogue T, Bindal P, et al. Incidence of thrombosis and hemorrhage in hospitalized cancer patients with COVID-19. *J Thromb Haemost*. 2020;18(9):2349-2357. doi:10.1111/jth.15018
296. Pelayo J, Lo KB, Bhargav R, et al. Clinical Characteristics and Outcomes of Community- and Hospital-Acquired Acute Kidney Injury with COVID-19 in a US Inner City Hospital System. *Cardiorenal Med*. 2020;10(4):223-231. doi:10.1159/000509182
297. Pellaud C, Grandmaison G, Pham Huu Thien HP, et al. Characteristics, comorbidities, 30-day outcome and in-hospital mortality of patients hospitalised with COVID-19 in a Swiss area - a retrospective cohort study. *Swiss Med Wkly*. 2020;150:w20314. doi:10.4414/smw.2020.20314
298. Peng J, Qi D, Yuan G, et al. Diagnostic value of peripheral hematologic markers for coronavirus disease 2019 (COVID-19): A multicenter, cross-sectional study. *J Clin Lab Anal*. 2020;34(10):e23475. doi:10.1002/jcla.23475
299. Pereira MR, Mohan S, Cohen DJ, et al. COVID-19 in solid organ transplant recipients: Initial report from the US epicenter. *Am J Transplant*. 2020;20(7):1800-1808. doi:10.1111/ajt.15941

300. Pérez-Sáez MJ, Blasco M, Redondo-Pachón D, et al. Use of tocilizumab in kidney transplant recipients with COVID-19. *Am J Transplant*. 2020;20(11):3182-3190. doi:10.1111/ajt.16192
301. Petersen A, Bressemer K, Albrecht J, et al. The role of visceral adiposity in the severity of COVID-19: Highlights from a unicenter cross-sectional pilot study in Germany. *Metabolism*. 2020;110:154317. doi:10.1016/j.metabol.2020.154317
302. Petrilli CM, Jones SA, Yang J, et al. Factors associated with hospital admission and critical illness among 5279 people with coronavirus disease 2019 in New York City: prospective cohort study. *BMJ*. 2020;369:m1966. doi:10.1136/bmj.m1966
303. Pettit NN, MacKenzie EL, Ridgway JP, et al. Obesity is Associated with Increased Risk for Mortality Among Hospitalized Patients with COVID-19. *Obesity (Silver Spring)*. 2020;28(10):1806-1810. doi:10.1002/oby.22941
304. Piano S, Dalbeni A, Vettore E, et al. Abnormal liver function tests predict transfer to intensive care unit and death in COVID-19. *Liver Int*. 2020;40(10):2394-2406. doi:10.1111/liv.14565
305. Pinto C, Berselli A, Mangone L, et al. SARS-CoV-2 Positive Hospitalized Cancer Patients during the Italian Outbreak: The Cohort Study in Reggio Emilia. *Biology (Basel)*. 2020;9(8):181. doi:10.3390/biology9080181
306. Poblador-Plou B, Carmona-Pérez J, Ioakeim-Skoufa I, et al. Baseline Chronic Comorbidity and Mortality in Laboratory-Confirmed COVID-19 Cases: Results from the PRECOVID Study in Spain. *Int J Environ Res Public Health*. 2020;17(14):5171. doi:10.3390/ijerph17145171
307. Ponziani FR, Del Zompo F, Nesci A, et al. Liver involvement is not associated with mortality: results from a large cohort of SARS-CoV-2-positive patients. *Aliment Pharmacol Ther*. 2020;52(6):1060-1068. doi:10.1111/apt.15996
308. Poyiadji N, Cormier P, Patel PY, et al. Acute Pulmonary Embolism and COVID-19. *Radiology*. 2020;297(3):E335-E338. doi:10.1148/radiol.2020201955
309. Qian J, Zhao L, Ye R-Z, Li X-J, Liu Y-L. Age-dependent Gender Differences in COVID-19 in Mainland China: Comparative Study. *Clin Infect Dis*. 2020;71(9):2488-2494. doi:10.1093/cid/ciaa683
310. Qin C, Zhou L, Hu Z, et al. Clinical Characteristics and Outcomes of COVID-19 Patients With a History of Stroke in Wuhan, China. *Stroke*. 2020;51(7):2219-2223. doi:10.1161/STROKEAHA.120.030365
311. Qin L, Li X, Shi J, et al. Gendered effects on inflammation reaction and outcome of COVID-19 patients in Wuhan. *J Med Virol*. 2020;92(11):2684-2692. doi:10.1002/jmv.26137
312. Quartuccio L, Sonaglia A, Pecori D, et al. Higher levels of IL-6 early after tocilizumab distinguish survivors from nonsurvivors in COVID-19 pneumonia: A possible indication for deeper targeting of IL-6. *J Med Virol*. 2020;92(11):2852-2856. doi:10.1002/jmv.26149

313. Ramachandran P, Onukogu I, Ghanta S, et al. Gastrointestinal Symptoms and Outcomes in Hospitalized Coronavirus Disease 2019 Patients. *Dig Dis*. 2020;38(5):373-379. doi:10.1159/000509774
314. Raoufi M, Safavi Naini SAA, Azizan Z, et al. Correlation between Chest Computed Tomography Scan Findings and Mortality of COVID-19 Cases; a Cross sectional Study. *Arch Acad Emerg Med*. 2020;8(1):e57. <http://www.ncbi.nlm.nih.gov/pubmed/32613199>.
315. Rastad H, Karim H, Ejtahed H-S, et al. Risk and predictors of in-hospital mortality from COVID-19 in patients with diabetes and cardiovascular disease. *Diabetol Metab Syndr*. 2020;12:57. doi:10.1186/s13098-020-00565-9
316. Rath D, Petersen-Uribe Á, Avdiu A, et al. Impaired cardiac function is associated with mortality in patients with acute COVID-19 infection. *Clin Res Cardiol*. 2020;109(12):1491-1499. doi:10.1007/s00392-020-01683-0
317. Redd WD, Zhou JC, Hathorn KE, et al. Prevalence and Characteristics of Gastrointestinal Symptoms in Patients With Severe Acute Respiratory Syndrome Coronavirus 2 Infection in the United States: A Multicenter Cohort Study. *Gastroenterology*. 2020;159(2):765-767. doi:10.1053/j.gastro.2020.04.045
318. Ren B, Yan F, Deng Z, et al. Extremely High Incidence of Lower Extremity Deep Venous Thrombosis in 48 Patients With Severe COVID-19 in Wuhan. *Circulation*. 2020;142(2):181-183. doi:10.1161/CIRCULATIONAHA.120.047407
319. Richardson S, Hirsch JS, Narasimhan M, et al. Presenting Characteristics, Comorbidities, and Outcomes Among 5700 Patients Hospitalized With COVID-19 in the New York City Area. *JAMA*. 2020;323(20):2052-2059. doi:10.1001/jama.2020.6775
320. Rivera-Izquierdo M, Valero-Ubierna MDC, Martínez-Diz S, et al. Clinical Factors, Preventive Behaviours and Temporal Outcomes Associated with COVID-19 Infection in Health Professionals at a Spanish Hospital. *Int J Environ Res Public Health*. 2020;17(12):4305. doi:10.3390/ijerph17124305
321. Rivera-Izquierdo M, Del Carmen Valero-Ubierna M, R-delAmo JL, et al. Sociodemographic, clinical and laboratory factors on admission associated with COVID-19 mortality in hospitalized patients: A retrospective observational study. *PLoS One*. 2020;15(6):e0235107. doi:10.1371/journal.pone.0235107
322. Robilotti E V, Babady NE, Mead PA, et al. Determinants of COVID-19 disease severity in patients with cancer. *Nat Med*. 2020;26(8):1218-1223. doi:10.1038/s41591-020-0979-0
323. Rogado J, Obispo B, Pangua C, et al. Covid-19 transmission, outcome and associated risk factors in cancer patients at the first month of the pandemic in a Spanish hospital in Madrid. *Clin Transl Oncol*. 2020;22(12):2364-2368. doi:10.1007/s12094-020-02381-z
324. San Román JA, Uribarri A, Amat-Santos IJ, Aparisi Á, Catalá P, González-Juanatey JR. The presence of heart disease worsens prognosis in patients with COVID-19. *Rev Esp Cardiol (Engl Ed)*. 2020;73(9):773-775.

doi:10.1016/j.rec.2020.05.025

325. Rosenberg ES, Dufort EM, Udo T, et al. Association of Treatment With Hydroxychloroquine or Azithromycin With In-Hospital Mortality in Patients With COVID-19 in New York State. *JAMA*. 2020;323(24):2493-2502. doi:10.1001/jama.2020.8630
326. Rossi R, Coppi F, Talarico M, Boriani G. Protective role of chronic treatment with direct oral anticoagulants in elderly patients affected by interstitial pneumonia in COVID-19 era. *Eur J Intern Med*. 2020;77:158-160. doi:10.1016/j.ejim.2020.06.006
327. Rottoli M, Bernante P, Belvedere A, et al. How important is obesity as a risk factor for respiratory failure, intensive care admission and death in hospitalised COVID-19 patients? Results from a single Italian centre. *Eur J Endocrinol*. 2020;183(4):389-397. doi:10.1530/EJE-20-0541
328. Rubin S, Orioux A, Prevel R, et al. Characterization of acute kidney injury in critically ill patients with severe coronavirus disease 2019. *Clin Kidney J*. 2020;13(3):354-361. doi:10.1093/ckj/sfaa099
329. Russo V, Di Maio M, Attenu E, et al. Clinical impact of pre-admission antithrombotic therapy in hospitalized patients with COVID-19: A multicenter observational study. *Pharmacol Res*. 2020;159:104965. doi:10.1016/j.phrs.2020.104965
330. Sabri A, Davarpanah AH, Mahdavi A, et al. Novel coronavirus disease 2019: predicting prognosis with a computed tomography-based disease severity score and clinical laboratory data. *Polish Arch Intern Med*. 2020;130(7-8):629-634. doi:10.20452/pamw.15422
331. Salacup G, Lo KB, Gul F, et al. Characteristics and clinical outcomes of COVID-19 patients in an underserved-inner city population: A single tertiary center cohort. *J Med Virol*. July 2020. doi:10.1002/jmv.26252
332. Saluja M, Pillai D, Jeliya S, Baudh N, Chandel R. COVID 19- Clinical Profile, Radiological Presentation, Prognostic Predictors, Complications and Outcome: A Perspective from the Indian Subcontinent. *J Assoc Physicians India*. 2020;68(7):13-18. <http://www.ncbi.nlm.nih.gov/pubmed/32602675>.
333. Sanchez-Pina JM, Rodríguez Rodríguez M, Castro Quismondo N, et al. Clinical course and risk factors for mortality from COVID-19 in patients with haematological malignancies. *Eur J Haematol*. 2020;105(5):597-607. doi:10.1111/ejh.13493
334. Santoliquido A, Porfidia A, Nesci A, et al. Incidence of deep vein thrombosis among non-ICU patients hospitalized for COVID-19 despite pharmacological thromboprophylaxis. *J Thromb Haemost*. 2020;18(9):2358-2363. doi:10.1111/jth.14992
335. Sardu C, D'Onofrio N, Balestrieri ML, et al. Hyperglycaemia on admission to hospital and COVID-19. *Diabetologia*. 2020;63(11):2486-2487. doi:10.1007/s00125-020-05216-2
336. Sardu C, Maggi P, Messina V, et al. Could Anti-Hypertensive Drug Therapy

- Affect the Clinical Prognosis of Hypertensive Patients With COVID-19 Infection? Data From Centers of Southern Italy. *J Am Heart Assoc.* 2020;9(17):e016948. doi:10.1161/JAHA.120.016948
337. Satici C, Demirkol MA, Sargin Altunok E, et al. Performance of pneumonia severity index and CURB-65 in predicting 30-day mortality in patients with COVID-19. *Int J Infect Dis.* 2020;98:84-89. doi:10.1016/j.ijid.2020.06.038
  338. Secco E, Pasqualetto MC, Bombardini T, Picano E, Rigo F. A possible benefit from therapeutic anticoagulation in patients with coronavirus disease 2019: the Dolo hospital experience in Veneto, Italy. *Kardiol Pol.* 2020;78(9):919-921. doi:10.33963/KP.15489
  339. Selçuk M, Çınar T, Keskin M, et al. Is the use of ACE inb/ARBs associated with higher in-hospital mortality in Covid-19 pneumonia patients? *Clin Exp Hypertens.* 2020;42(8):738-742. doi:10.1080/10641963.2020.1783549
  340. Semenova Y, Glushkova N, Pivina L, et al. Epidemiological Characteristics and Forecast of COVID-19 Outbreak in the Republic of Kazakhstan. *J Korean Med Sci.* 2020;35(24):e227. doi:10.3346/jkms.2020.35.e227
  341. Shah V, Ko Ko T, Zuckerman M, et al. Poor outcome and prolonged persistence of SARS-CoV-2 RNA in COVID-19 patients with haematological malignancies; King's College Hospital experience. *Br J Haematol.* 2020;190(5):e279-e282. doi:10.1111/bjh.16935
  342. Shah P, Owens J, Franklin J, et al. Demographics, comorbidities and outcomes in hospitalized Covid-19 patients in rural southwest Georgia. *Ann Med.* 2020;52(7):354-360. doi:10.1080/07853890.2020.1791356
  343. Shahriarirad R, Khodamoradi Z, Erfani A, et al. Epidemiological and clinical features of 2019 novel coronavirus diseases (COVID-19) in the South of Iran. *BMC Infect Dis.* 2020;20(1):427. doi:10.1186/s12879-020-05128-x
  344. Shang J, Wang Q, Zhang H, et al. The Relationship Between Diabetes Mellitus and COVID-19 Prognosis: A Retrospective Cohort Study in Wuhan, China. *Am J Med.* 2021;134(1):e6-e14. doi:10.1016/j.amjmed.2020.05.033
  345. Shekhar R, Sheikh AB, Upadhyay S, Atencio J, Kapuria D. Early experience with COVID-19 patients at academic hospital in Southwestern United States. *Infect Dis (London, England).* 2020;52(8):596-599. doi:10.1080/23744235.2020.1774645
  346. Shen L, Li S, Zhu Y, et al. Clinical and laboratory-derived parameters of 119 hospitalized patients with coronavirus disease 2019 in Xiangyang, Hubei Province, China. *J Infect.* 2020;81(1):147-178. doi:10.1016/j.jinf.2020.03.038
  347. Shi S, Qin M, Cai Y, et al. Characteristics and clinical significance of myocardial injury in patients with severe coronavirus disease 2019. *Eur Heart J.* 2020;41(22):2070-2079. doi:10.1093/eurheartj/ehaa408
  348. Simonnet A, Chetboun M, Poissy J, et al. High prevalence of obesity in severe acute respiratory syndrome coronavirus-2 (SARS-CoV-2) requiring invasive mechanical ventilation. *Obesity (Silver Spring).* April 2020. doi:10.1002/oby.22831

349. Singer AJ, Morley EJ, Meyers K, et al. Cohort of Four Thousand Four Hundred Four Persons Under Investigation for COVID-19 in a New York Hospital and Predictors of ICU Care and Ventilation. *Ann Emerg Med.* 2020;76(4):394-404. doi:10.1016/j.annemergmed.2020.05.011
350. Smadja DM, Guerin CL, Chocron R, et al. Angiopoietin-2 as a marker of endothelial activation is a good predictor factor for intensive care unit admission of COVID-19 patients. *Angiogenesis.* 2020;23(4):611-620. doi:10.1007/s10456-020-09730-0
351. Smith SM, Boppana A, Traupman JA, et al. Impaired glucose metabolism in patients with diabetes, prediabetes, and obesity is associated with severe COVID-19. *J Med Virol.* June 2020. doi:10.1002/jmv.26227
352. Soares R de CM, Mattos LR, Raposo LM. Risk Factors for Hospitalization and Mortality due to COVID-19 in Espírito Santo State, Brazil. *Am J Trop Med Hyg.* 2020;103(3):1184-1190. doi:10.4269/ajtmh.20-0483
353. Asghar MS, Haider Kazmi SJ, Ahmed Khan N, et al. Clinical Profiles, Characteristics, and Outcomes of the First 100 Admitted COVID-19 Patients in Pakistan: A Single-Center Retrospective Study in a Tertiary Care Hospital of Karachi. *Cureus.* 2020;12(6):e8712. doi:10.7759/cureus.8712
354. Solaimanzadeh I. Nifedipine and Amlodipine Are Associated With Improved Mortality and Decreased Risk for Intubation and Mechanical Ventilation in Elderly Patients Hospitalized for COVID-19. *Cureus.* 2020;12(5):e8069. doi:10.7759/cureus.8069
355. Somers EC, Eschenauer GA, Troost JP, et al. Tocilizumab for treatment of mechanically ventilated patients with COVID-19. *Clin Infect Dis.* July 2020. doi:10.1093/cid/ciaa954
356. Sousa GJB, Garces TS, Cestari VRF, Florêncio RS, Moreira TMM, Pereira MLD. Mortality and survival of COVID-19. *Epidemiol Infect.* 2020;148:e123. doi:10.1017/S0950268820001405
357. Stevens RW, Jensen K, O'Horo JC, Shah A. Antimicrobial prescribing practices at a tertiary-care center in patients diagnosed with COVID-19 across the continuum of care. *Infect Control Hosp Epidemiol.* 2021;42(1):89-92. doi:10.1017/ice.2020.370
358. Stoneham SM, Milne KM, Nuttall E, et al. Thrombotic risk in COVID-19: a case series and case-control study. *Clin Med.* 2020;20(4):e76-e81. doi:10.7861/clinmed.2020-0228
359. Stroppa EM, Toscani I, Citterio C, et al. Coronavirus disease-2019 in cancer patients. A report of the first 25 cancer patients in a western country (Italy). *Future Oncol.* 2020;16(20):1425-1432. doi:10.2217/fon-2020-0369
360. Suleyman G, Fadel RA, Malette KM, et al. Clinical Characteristics and Morbidity Associated With Coronavirus Disease 2019 in a Series of Patients in Metropolitan Detroit. *JAMA Netw open.* 2020;3(6):e2012270. doi:10.1001/jamanetworkopen.2020.12270
361. Sun B, Feng Y, Mo X, et al. Kinetics of SARS-CoV-2 specific IgM and IgG

- responses in COVID-19 patients. *Emerg Microbes Infect.* 2020;9(1):940-948. doi:10.1080/22221751.2020.1762515
362. Sun H, Ning R, Tao Y, et al. Risk Factors for Mortality in 244 Older Adults With COVID-19 in Wuhan, China: A Retrospective Study. *J Am Geriatr Soc.* 2020;68(6):E19-E23. doi:10.1111/jgs.16533
363. Sun D-W, Zhang D, Tian R-H, et al. The underlying changes and predicting role of peripheral blood inflammatory cells in severe COVID-19 patients: A sentinel? *Clin Chim Acta.* 2020;508:122-129. doi:10.1016/j.cca.2020.05.027
364. Tambe MP, Parande MA, Tapare VS, et al. An epidemiological study of laboratory confirmed COVID-19 cases admitted in a tertiary care hospital of Pune, Maharashtra. *Indian J Public Health.* 2020;64(Supplement):S183-S187. doi:10.4103/ijph.IJPH\_522\_20
365. Tan N-D, Qiu Y, Xing X-B, Ghosh S, Chen M-H, Mao R. Associations Between Angiotensin-Converting Enzyme Inhibitors and Angiotensin II Receptor Blocker Use, Gastrointestinal Symptoms, and Mortality Among Patients With COVID-19. *Gastroenterology.* 2020;159(3):1170-1172. doi:10.1053/j.gastro.2020.05.034
366. Tan T, Khoo B, Mills EG, et al. Association between high serum total cortisol concentrations and mortality from COVID-19. *Lancet Diabetes Endocrinol.* 2020;8(8):659-660. doi:10.1016/S2213-8587(20)30216-3
367. Tanriverdi E, ÇÖrtük M, Yildirim BiZ, et al. The use of hydroxychloroquine plus azithromycin and early hospital admission are beneficial in Covid-19 patients: Turkey experience with real-life data. *Turkish J Med Sci.* July 2020. doi:10.3906/sag-2005-82
368. Tatum D, Taghavi S, Houghton A, Stover J, Toraih E, Duchesne J. Neutrophil-to-Lymphocyte Ratio and Outcomes in Louisiana COVID-19 Patients. *Shock.* 2020;54(5):652-658. doi:10.1097/SHK.0000000000001585
369. Tenforde MW, Billig Rose E, Lindsell CJ, et al. Characteristics of Adult Outpatients and Inpatients with COVID-19 - 11 Academic Medical Centers, United States, March-May 2020. *MMWR Morb Mortal Wkly Rep.* 2020;69(26):841-846. doi:10.15585/mmwr.mm6926e3
370. Tharakan S, Nomoto K, Miyashita S, Ishikawa K. Body temperature correlates with mortality in COVID-19 patients. *Crit Care.* 2020;24(1):298. doi:10.1186/s13054-020-03045-8
371. Tomlins J, Hamilton F, Gunning S, Sheehy C, Moran E, MacGowan A. Clinical features of 95 sequential hospitalised patients with novel coronavirus 2019 disease (COVID-19), the first UK cohort. *J Infect.* 2020;81(2):e59-e61. doi:10.1016/j.jinf.2020.04.020
372. Toussie D, Voutsinas N, Finkelstein M, et al. Clinical and Chest Radiography Features Determine Patient Outcomes in Young and Middle-aged Adults with COVID-19. *Radiology.* 2020;297(1):E197-E206. doi:10.1148/radiol.2020201754
373. Trimaille A, Curtiaud A, Marchandot B, et al. Venous thromboembolism in

- non-critically ill patients with COVID-19 infection. *Thromb Res.* 2020;193:166-169. doi:10.1016/j.thromres.2020.07.033
374. Trujillo H, Caravaca-Fontán F, Sevillano Á, et al. SARS-CoV-2 Infection in Hospitalized Patients With Kidney Disease. *Kidney Int reports.* 2020;5(6):905-909. doi:10.1016/j.ekir.2020.04.024
375. Urra JM, Cabrera CM, Porras L, Ródenas I. Selective CD8 cell reduction by SARS-CoV-2 is associated with a worse prognosis and systemic inflammation in COVID-19 patients. *Clin Immunol.* 2020;217:108486. doi:10.1016/j.clim.2020.108486
376. Valeri AM, Robbins-Juarez SY, Stevens JS, et al. Presentation and Outcomes of Patients with ESKD and COVID-19. *J Am Soc Nephrol.* 2020;31(7):1409-1415. doi:10.1681/ASN.2020040470
377. van Gerwen M, Alsen M, Little C, et al. Risk factors and outcomes of COVID-19 in New York City; a retrospective cohort study. *J Med Virol.* 2021;93(2):907-915. doi:10.1002/jmv.26337
378. Villard O, Morquin D, Molinari N, et al. The Plasmatic Aldosterone and C-Reactive Protein Levels, and the Severity of Covid-19: The Dyhor-19 Study. *J Clin Med.* 2020;9(7):2315. doi:10.3390/jcm9072315
379. Vivanti AJ, Mattern J, Vauloup-Fellous C, et al. Retrospective Description of Pregnant Women Infected with Severe Acute Respiratory Syndrome Coronavirus 2, France. *Emerg Infect Dis.* 2020;26(9):2069-2076. doi:10.3201/eid2609.202144
380. Wan Y, Wu J, Ni L, et al. Prognosis analysis of patients with mental disorders with COVID-19: a single-center retrospective study. *Aging (Albany NY).* 2020;12(12):11238-11244. doi:10.18632/aging.103371
381. Wang D, Hu B, Hu C, et al. Clinical Characteristics of 138 Hospitalized Patients With 2019 Novel Coronavirus-Infected Pneumonia in Wuhan, China. *JAMA.* 2020;323(11):1061-1069. doi:10.1001/jama.2020.1585
382. Wang Z, Yang B, Li Q, Wen L, Zhang R. Clinical Features of 69 Cases With Coronavirus Disease 2019 in Wuhan, China. *Clin Infect Dis.* 2020;71(15):769-777. doi:10.1093/cid/ciaa272
383. Wang L, He W, Yu X, et al. Coronavirus disease 2019 in elderly patients: Characteristics and prognostic factors based on 4-week follow-up. *J Infect.* 2020;80(6):639-645. doi:10.1016/j.jinf.2020.03.019
384. Wang Y, Lu X, Li Y, et al. Clinical Course and Outcomes of 344 Intensive Care Patients with COVID-19. *Am J Respir Crit Care Med.* 2020;201(11):1430-1434. doi:10.1164/rccm.202003-0736LE
385. Wang K, Zhang Z, Yu M, Tao Y, Xie M. 15-day mortality and associated risk factors for hospitalized patients with COVID-19 in Wuhan, China: an ambispective observational cohort study. *Intensive Care Med.* 2020;46(7):1472-1474. doi:10.1007/s00134-020-06047-w
386. Wang D, Yin Y, Hu C, et al. Clinical course and outcome of 107 patients infected with the novel coronavirus, SARS-CoV-2, discharged from two

- hospitals in Wuhan, China. *Crit Care*. 2020;24(1):188. doi:10.1186/s13054-020-02895-6
387. Wang F, Yang Y, Dong K, et al. CLINICAL CHARACTERISTICS OF 28 PATIENTS WITH DIABETES AND COVID-19 IN WUHAN, CHINA. *Endocr Pract*. 2020;26(6):668-674. doi:10.4158/EP-2020-0108
388. Wang K, Zuo P, Liu Y, et al. Clinical and Laboratory Predictors of In-hospital Mortality in Patients With Coronavirus Disease-2019: A Cohort Study in Wuhan, China. *Clin Infect Dis*. 2020;71(16):2079-2088. doi:10.1093/cid/ciaa538
389. Wang S, Chen Y, Wang L, Liu H, Han P. Are COVID-19 patients with hypertension at higher risk in China? *J Hypertens*. 2020;38(7):1384-1385. doi:10.1097/HJH.0000000000002483
390. Wang B, Van Oekelen O, Mouhieddine TH, et al. A tertiary center experience of multiple myeloma patients with COVID-19: lessons learned and the path forward. *J Hematol Oncol*. 2020;13(1):94. doi:10.1186/s13045-020-00934-x
391. Whyte MB, Kelly PA, Gonzalez E, Arya R, Roberts LN. Pulmonary embolism in hospitalised patients with COVID-19. *Thromb Res*. 2020;195:95-99. doi:10.1016/j.thromres.2020.07.025
392. Wu Q, Wang S, Li L, et al. Radiomics Analysis of Computed Tomography helps predict poor prognostic outcome in COVID-19. *Theranostics*. 2020;10(16):7231-7244. doi:10.7150/thno.46428
393. Wu F, Zhou Y, Wang Z, et al. Clinical characteristics of COVID-19 infection in chronic obstructive pulmonary disease: a multicenter, retrospective, observational study. *J Thorac Dis*. 2020;12(5):1811-1823. doi:10.21037/jtd-20-1914
394. Xu B, Fan C-Y, Wang A-L, et al. Suppressed T cell-mediated immunity in patients with COVID-19: A clinical retrospective study in Wuhan, China. *J Infect*. 2020;81(1):e51-e60. doi:10.1016/j.jinf.2020.04.012
395. Xu H, Huang S, Qiu C, et al. Monitoring and Management of Home-Quarantined Patients With COVID-19 Using a WeChat-Based Telemedicine System: Retrospective Cohort Study. *J Med Internet Res*. 2020;22(7):e19514. doi:10.2196/19514
396. Xu J, Huang C, Fan G, et al. Use of angiotensin-converting enzyme inhibitors and angiotensin II receptor blockers in context of COVID-19 outbreak: a retrospective analysis. *Front Med*. 2020;14(5):601-612. doi:10.1007/s11684-020-0800-y
397. Yan CH, Faraji F, Prajapati DP, Ostrander BT, DeConde AS. Self-reported olfactory loss associates with outpatient clinical course in COVID-19. *Int Forum Allergy Rhinol*. 2020;10(7):821-831. doi:10.1002/alr.22592
398. Yan X, Li F, Wang X, et al. Neutrophil to lymphocyte ratio as prognostic and predictive factor in patients with coronavirus disease 2019: A retrospective cross-sectional study. *J Med Virol*. 2020;92(11):2573-2581. doi:10.1002/jmv.26061

399. Yang X, Yu Y, Xu J, et al. Clinical course and outcomes of critically ill patients with SARS-CoV-2 pneumonia in Wuhan, China: a single-centered, retrospective, observational study. *Lancet Respir Med.* 2020;8(5):475-481. doi:10.1016/S2213-2600(20)30079-5
400. Yang R, Gui X, Zhang Y, Xiong Y. The role of essential organ-based comorbidities in the prognosis of COVID-19 infection patients. *Expert Rev Respir Med.* 2020;14(8):835-838. doi:10.1080/17476348.2020.1761791
401. Yang L, Liu J, Zhang R, et al. Epidemiological and clinical features of 200 hospitalized patients with corona virus disease 2019 outside Wuhan, China: A descriptive study. *J Clin Virol.* 2020;129:104475. doi:10.1016/j.jcv.2020.104475
402. Yang BY, Barnard LM, Emert JM, et al. Clinical Characteristics of Patients With Coronavirus Disease 2019 (COVID-19) Receiving Emergency Medical Services in King County, Washington. *JAMA Netw open.* 2020;3(7):e2014549. doi:10.1001/jamanetworkopen.2020.14549
403. Yao Q, Wang P, Wang X, et al. A retrospective study of risk factors for severe acute respiratory syndrome coronavirus 2 infections in hospitalized adult patients. *Polish Arch Intern Med.* 2020;130(5):390-399. doi:10.20452/pamw.15312
404. Yao Y, Cao J, Wang Q, et al. D-dimer as a biomarker for disease severity and mortality in COVID-19 patients: a case control study. *J intensive care.* 2020;8:49. doi:10.1186/s40560-020-00466-z
405. Yarza R, Bover M, Paredes D, et al. SARS-CoV-2 infection in cancer patients undergoing active treatment: analysis of clinical features and predictive factors for severe respiratory failure and death. *Eur J Cancer.* 2020;135:242-250. doi:10.1016/j.ejca.2020.06.001
406. Ye C, Cai S, Shen G, et al. Clinical features of rheumatic patients infected with COVID-19 in Wuhan, China. *Ann Rheum Dis.* 2020;79(8):1007-1013. doi:10.1136/annrheumdis-2020-217627
407. Ye C, Zhang S, Zhang X, et al. Impact of comorbidities on patients with COVID-19: A large retrospective study in Zhejiang, China. *J Med Virol.* 2020;92(11):2821-2829. doi:10.1002/jmv.26183
408. Yip TC-F, Lui GC-Y, Wong VW-S, et al. Liver injury is independently associated with adverse clinical outcomes in patients with COVID-19. *Gut.* July 2020. doi:10.1136/gutjnl-2020-321726
409. Yu T, Cai S, Zheng Z, et al. Association Between Clinical Manifestations and Prognosis in Patients with COVID-19. *Clin Ther.* 2020;42(6):964-972. doi:10.1016/j.clinthera.2020.04.009
410. Yu C, Lei Q, Li W, et al. Clinical Characteristics, Associated Factors, and Predicting COVID-19 Mortality Risk: A Retrospective Study in Wuhan, China. *Am J Prev Med.* 2020;59(2):168-175. doi:10.1016/j.amepre.2020.05.002
411. Yuan M, Yin W, Tao Z, Tan W, Hu Y. Association of radiologic findings with mortality of patients infected with 2019 novel coronavirus in Wuhan, China.

- PLoS One*. 2020;15(3):e0230548. doi:10.1371/journal.pone.0230548
412. Zeng Q-L, Li G-M, Ji F, et al. Clinical course and treatment efficacy of COVID-19 near Hubei Province, China: A multicentre, retrospective study. *Transbound Emerg Dis*. 2020;67(6):2971-2982. doi:10.1111/tbed.13674
  413. Zeng Z, Ma Y, Zeng H, et al. Simple nomogram based on initial laboratory data for predicting the probability of ICU transfer of COVID-19 patients: Multicenter retrospective study. *J Med Virol*. June 2020. doi:10.1002/jmv.26244
  414. Zhang P, Zhu L, Cai J, et al. Association of Inpatient Use of Angiotensin-Converting Enzyme Inhibitors and Angiotensin II Receptor Blockers With Mortality Among Patients With Hypertension Hospitalized With COVID-19. *Circ Res*. 2020;126(12):1671-1681. doi:10.1161/CIRCRESAHA.120.317134
  415. Zhang J, Wang X, Jia X, et al. Risk factors for disease severity, unimprovement, and mortality in COVID-19 patients in Wuhan, China. *Clin Microbiol Infect*. 2020;26(6):767-772. doi:10.1016/j.cmi.2020.04.012
  416. Zhang L, Feng X, Zhang D, et al. Deep Vein Thrombosis in Hospitalized Patients With COVID-19 in Wuhan, China: Prevalence, Risk Factors, and Outcome. *Circulation*. 2020;142(2):114-128. doi:10.1161/CIRCULATIONAHA.120.046702
  417. Zhang C, Qin L, Li K, et al. A Novel Scoring System for Prediction of Disease Severity in COVID-19. *Front Cell Infect Microbiol*. 2020;10:318. doi:10.3389/fcimb.2020.00318
  418. Zhang L, Han C, Zhang S, et al. Diarrhea and altered inflammatory cytokine pattern in severe coronavirus disease 2019: Impact on disease course and in-hospital mortality. *J Gastroenterol Hepatol*. June 2020. doi:10.1111/jgh.15166
  419. Zhang J-J, Cao Y-Y, Tan G, et al. Clinical, radiological, and laboratory characteristics and risk factors for severity and mortality of 289 hospitalized COVID-19 patients. *Allergy*. 2021;76(2):533-550. doi:10.1111/all.14496
  420. Zhang S, Guo M, Duan L, et al. Development and validation of a risk factor-based system to predict short-term survival in adult hospitalized patients with COVID-19: a multicenter, retrospective, cohort study. *Crit Care*. 2020;24(1):438. doi:10.1186/s13054-020-03123-x
  421. Zhao M, Wang M, Zhang J, et al. Comparison of clinical characteristics and outcomes of patients with coronavirus disease 2019 at different ages. *Aging (Albany NY)*. 2020;12(11):10070-10086. doi:10.18632/aging.103298
  422. Zheng Y, Sun L-J, Xu M, et al. Clinical characteristics of 34 COVID-19 patients admitted to intensive care unit in Hangzhou, China. *J Zhejiang Univ Sci B*. 2020;21(5):378-387. doi:10.1631/jzus.B2000174
  423. Zheng Y, Xiao A, Yu X, et al. Development and Validation of a Prognostic Nomogram Based on Clinical and CT Features for Adverse Outcome Prediction in Patients with COVID-19. *Korean J Radiol*. 2020;21(8):1007-1017. doi:10.3348/kjr.2020.0485
  424. Zhou F, Yu T, Du R, et al. Clinical course and risk factors for mortality of adult

- inpatients with COVID-19 in Wuhan, China: a retrospective cohort study. *Lancet (London, England)*. 2020;395(10229):1054-1062. doi:10.1016/S0140-6736(20)30566-3
425. Zhou Z, Zhao N, Shu Y, Han S, Chen B, Shu X. Effect of Gastrointestinal Symptoms in Patients With COVID-19. *Gastroenterology*. 2020;158(8):2294-2297. doi:10.1053/j.gastro.2020.03.020
426. Zhou X, Zhu J, Xu T. Clinical characteristics of coronavirus disease 2019 (COVID-19) patients with hypertension on renin-angiotensin system inhibitors. *Clin Exp Hypertens*. 2020;42(7):656-660. doi:10.1080/10641963.2020.1764018
427. Zhu L, She Z-G, Cheng X, et al. Association of Blood Glucose Control and Outcomes in Patients with COVID-19 and Pre-existing Type 2 Diabetes. *Cell Metab*. 2020;31(6):1068-1077. doi:10.1016/j.cmet.2020.04.021
428. Zou X, Li S, Fang M, et al. Acute Physiology and Chronic Health Evaluation II Score as a Predictor of Hospital Mortality in Patients of Coronavirus Disease 2019. *Crit Care Med*. 2020;48(8):e657-e665. doi:10.1097/CCM.0000000000004411
